# Supplementary material for: Direct organocatalytic transfer hydrogenation and C–H oxidation: high-yielding synthesis of 3-hydroxy-3-alkyloxindoles
Source: Royal Society of Chemistry journal article supplement (doi:10.1039/d3ob01264f), 2023-01-01

## Supporting Information-II

### NMR Spectral Data

#### Direct Organocatalytic Transfer Hydrogenation and C-H Oxidation: High-Yielding Synthesis of 3-Hydroxy-3-alkyloxindoles

Pritam Roy, S. Rehana Anjum, Shyam D. Sanwal and Dhevalapally B. Ramachary\*

*Catalysis Laboratory, School of Chemistry, University of Hyderabad, Central University (P.O.),*

*Hyderabad 500 046, India*

[ramsc@uohyd.ac.in](mailto:ramsc@uohyd.ac.in) and [ramchary.db@gmail.com](mailto:ramchary.db@gmail.com)

<sup>1</sup>H NMR 500 MHz CDCl<sub>3</sub>

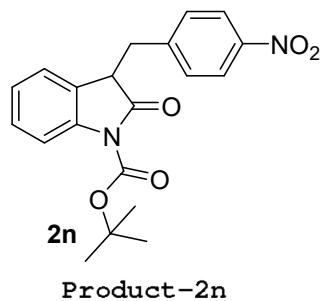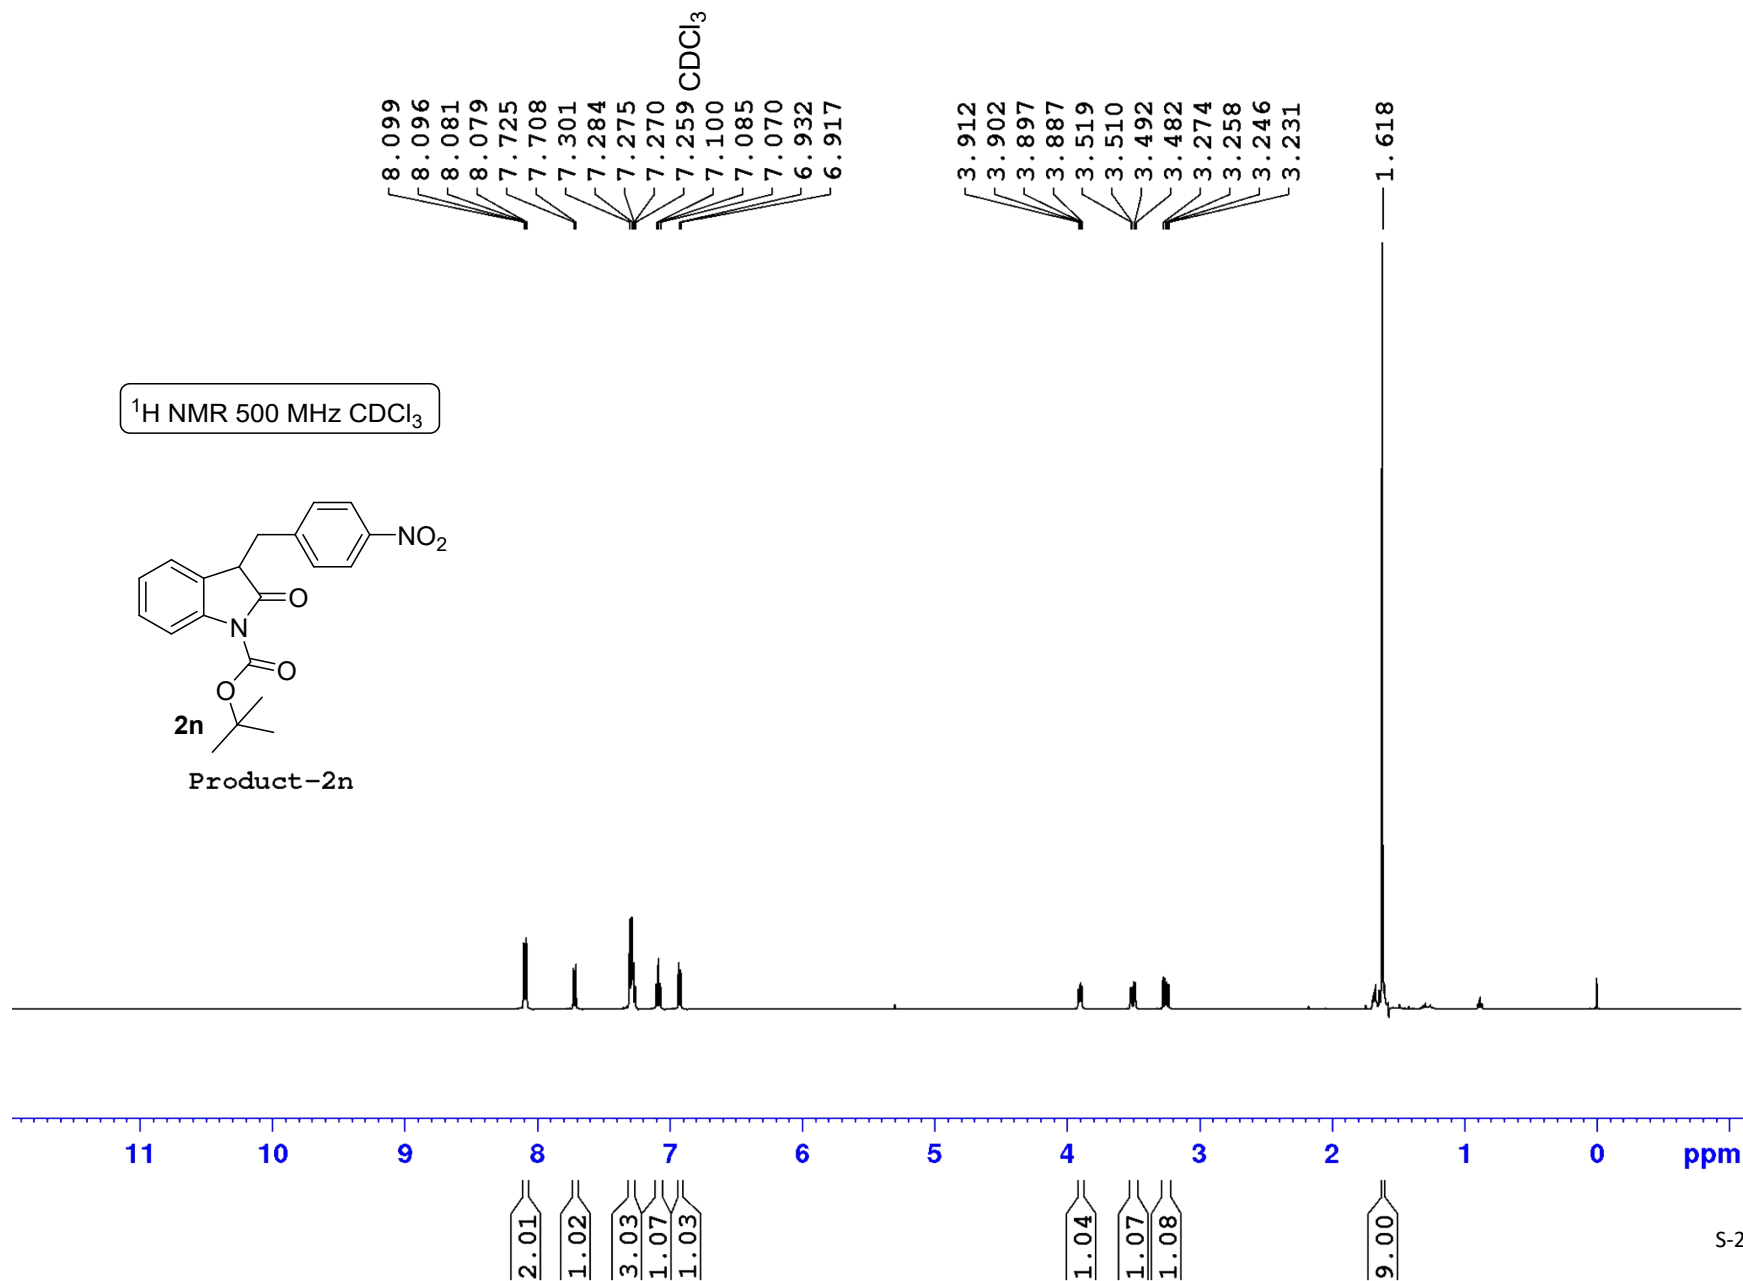

<sup>13</sup>C NMR 100 MHz CDCl<sub>3</sub>

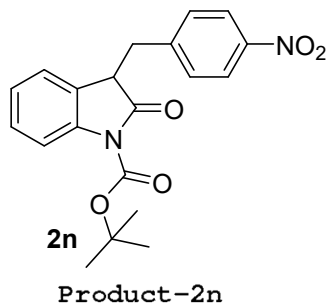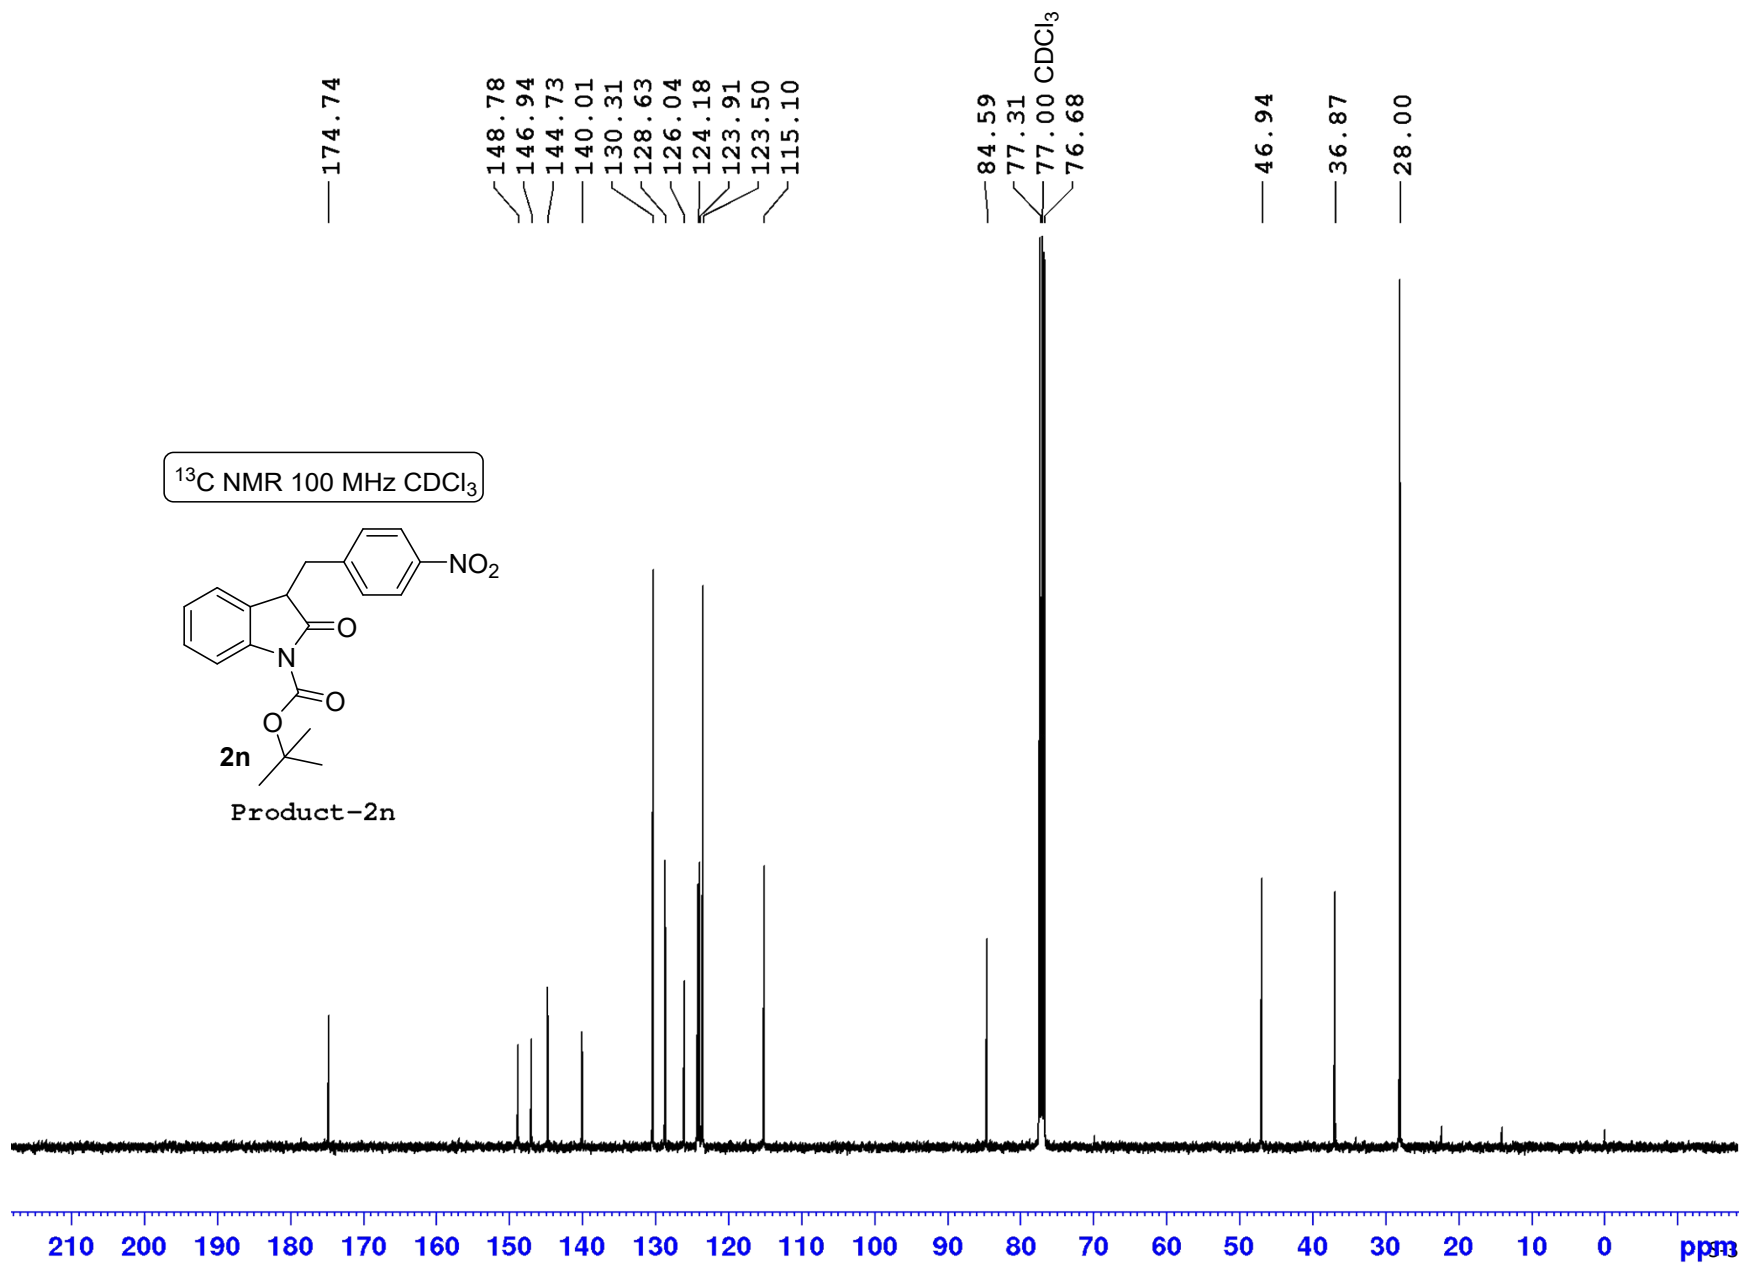

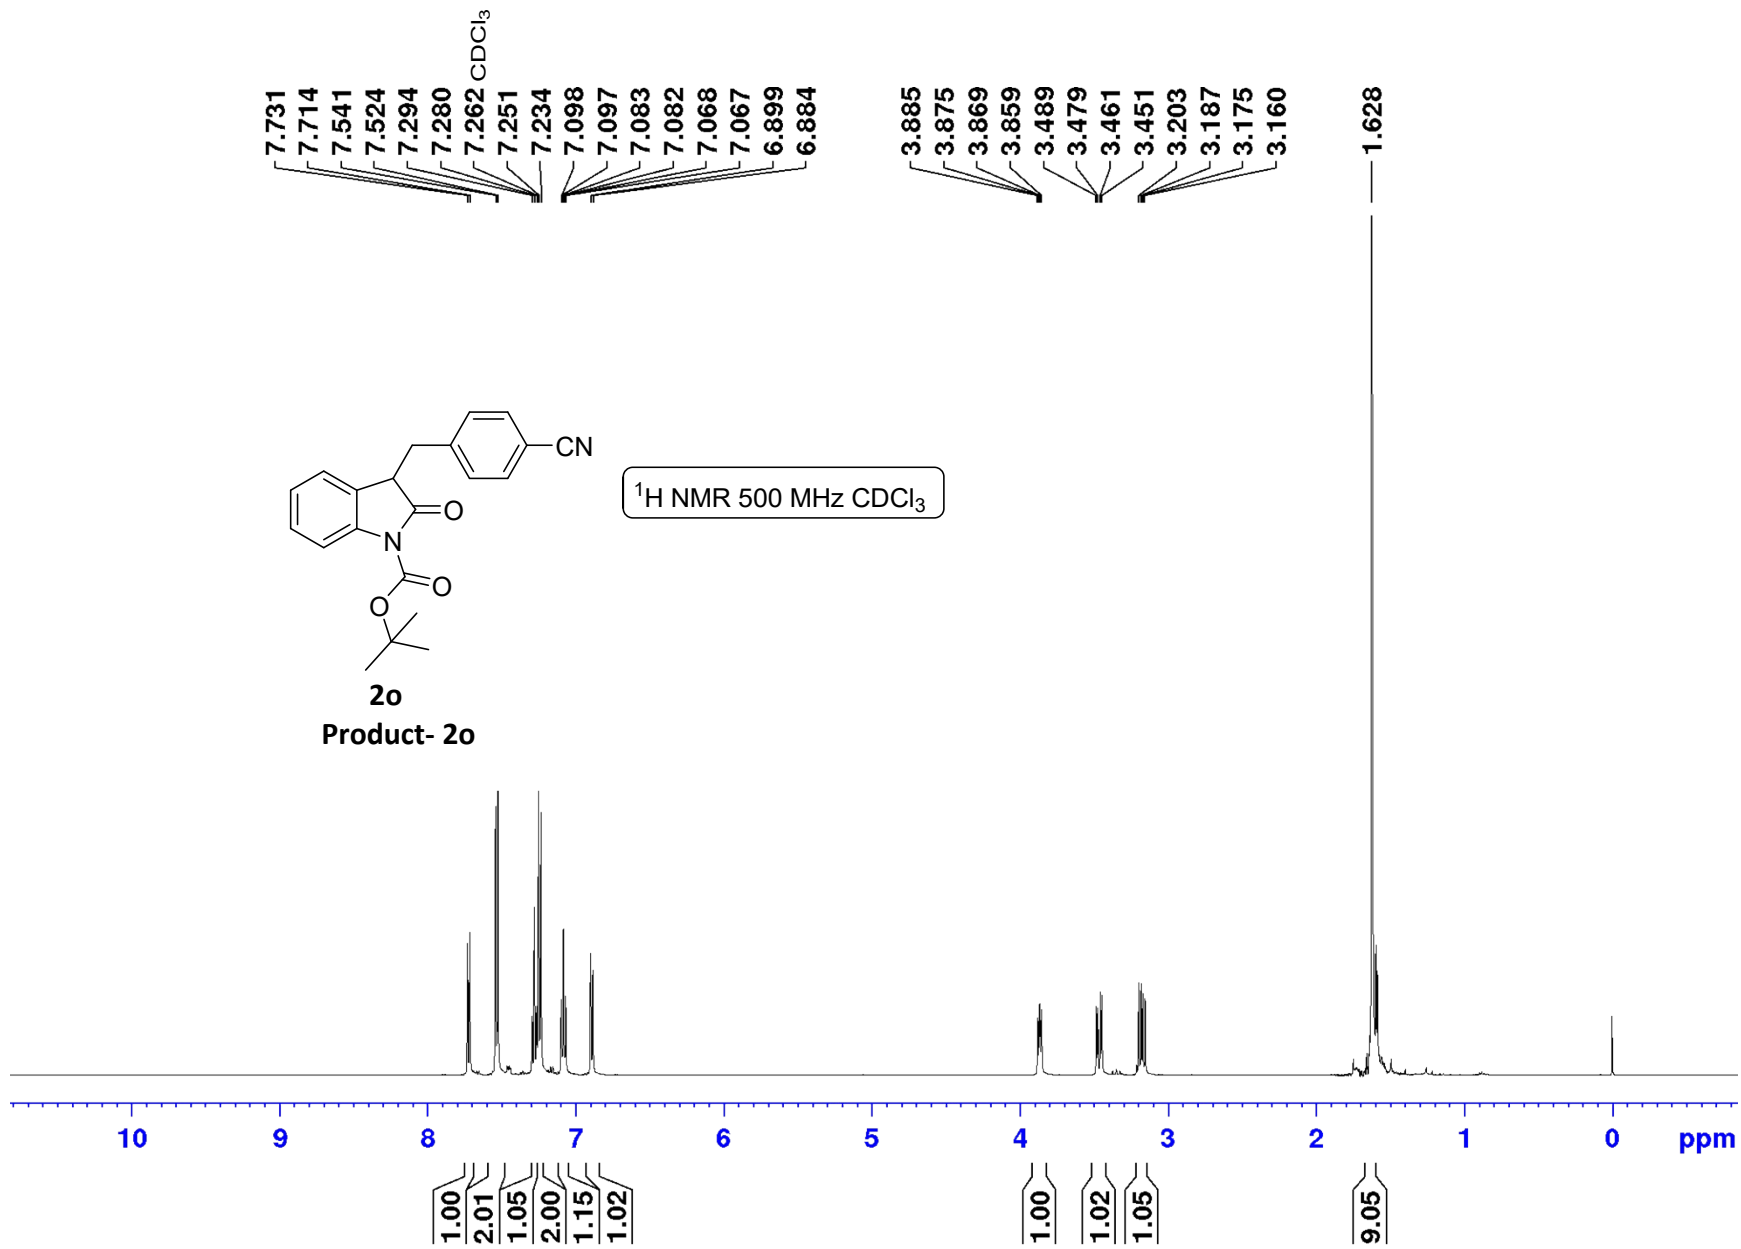

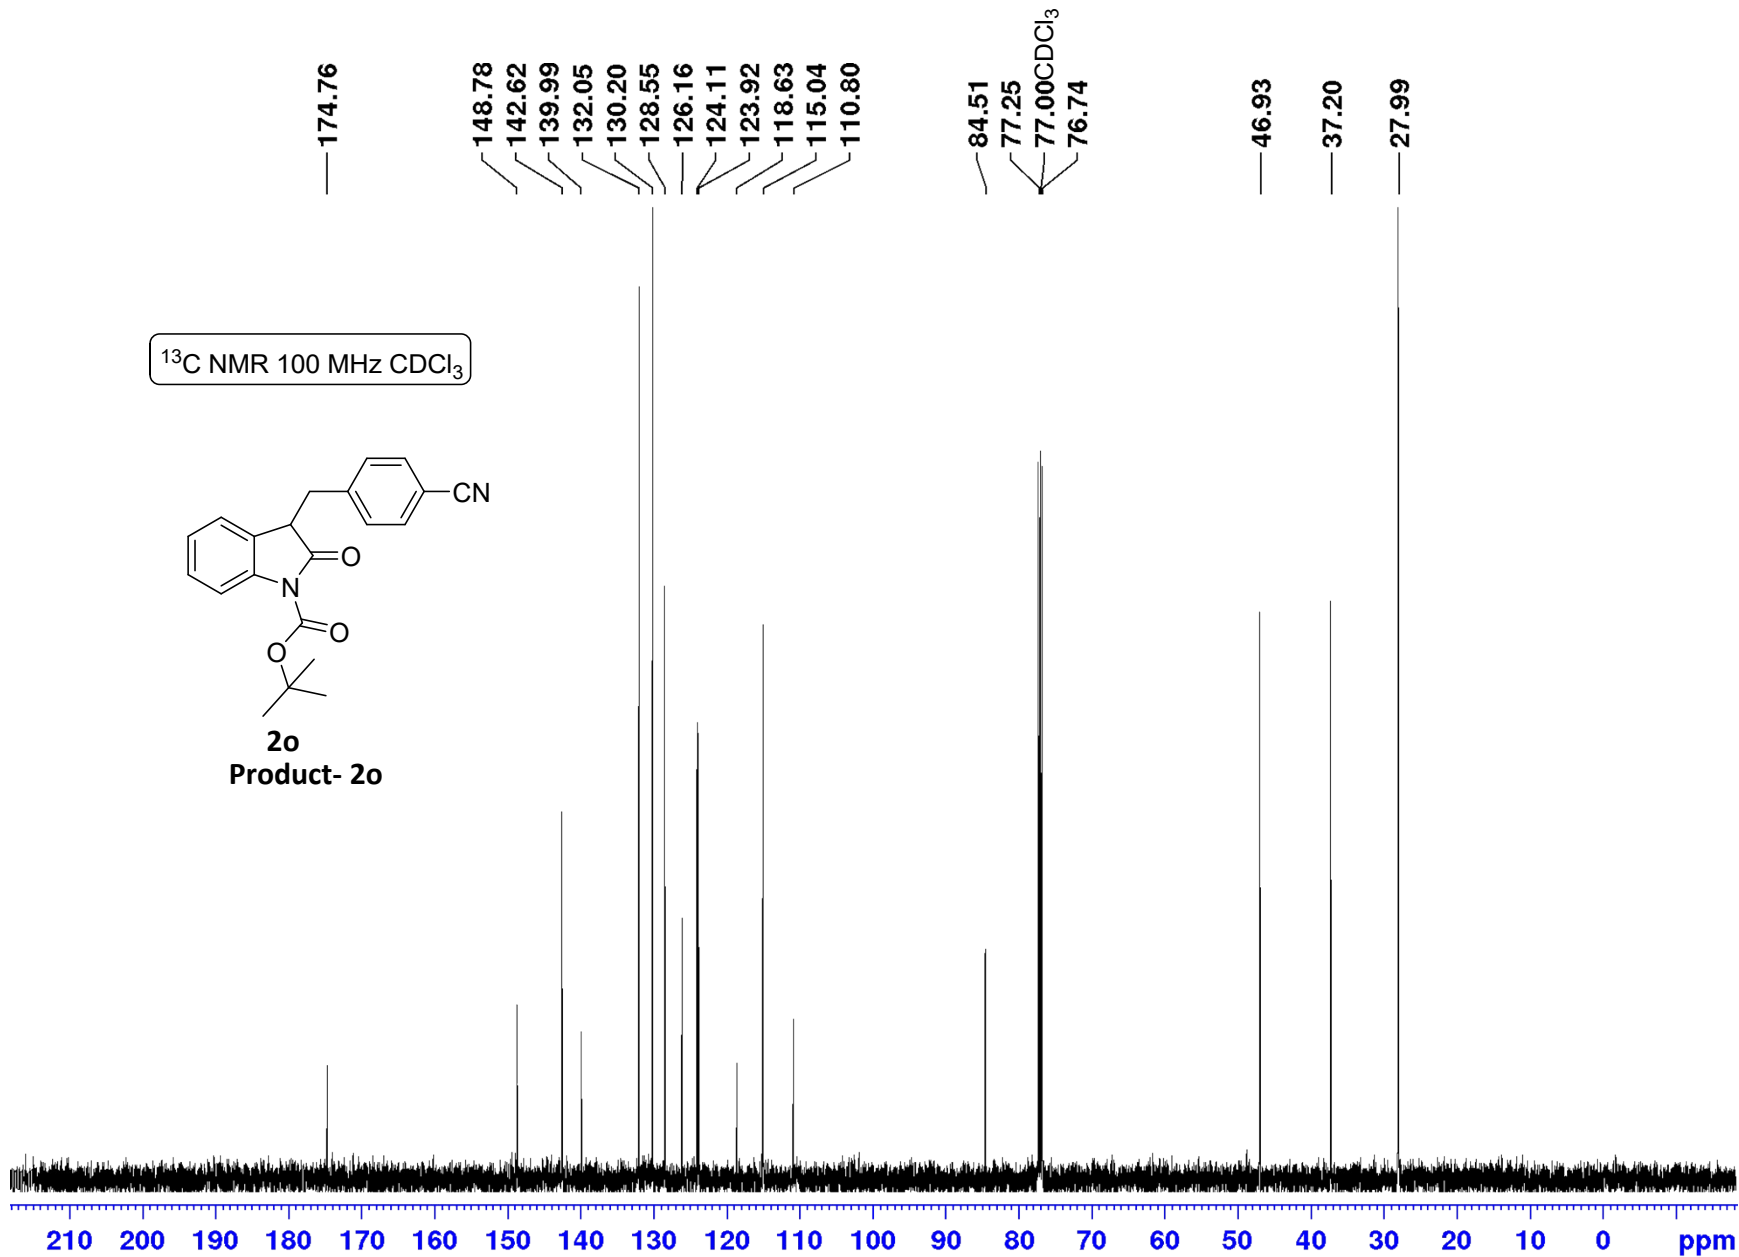

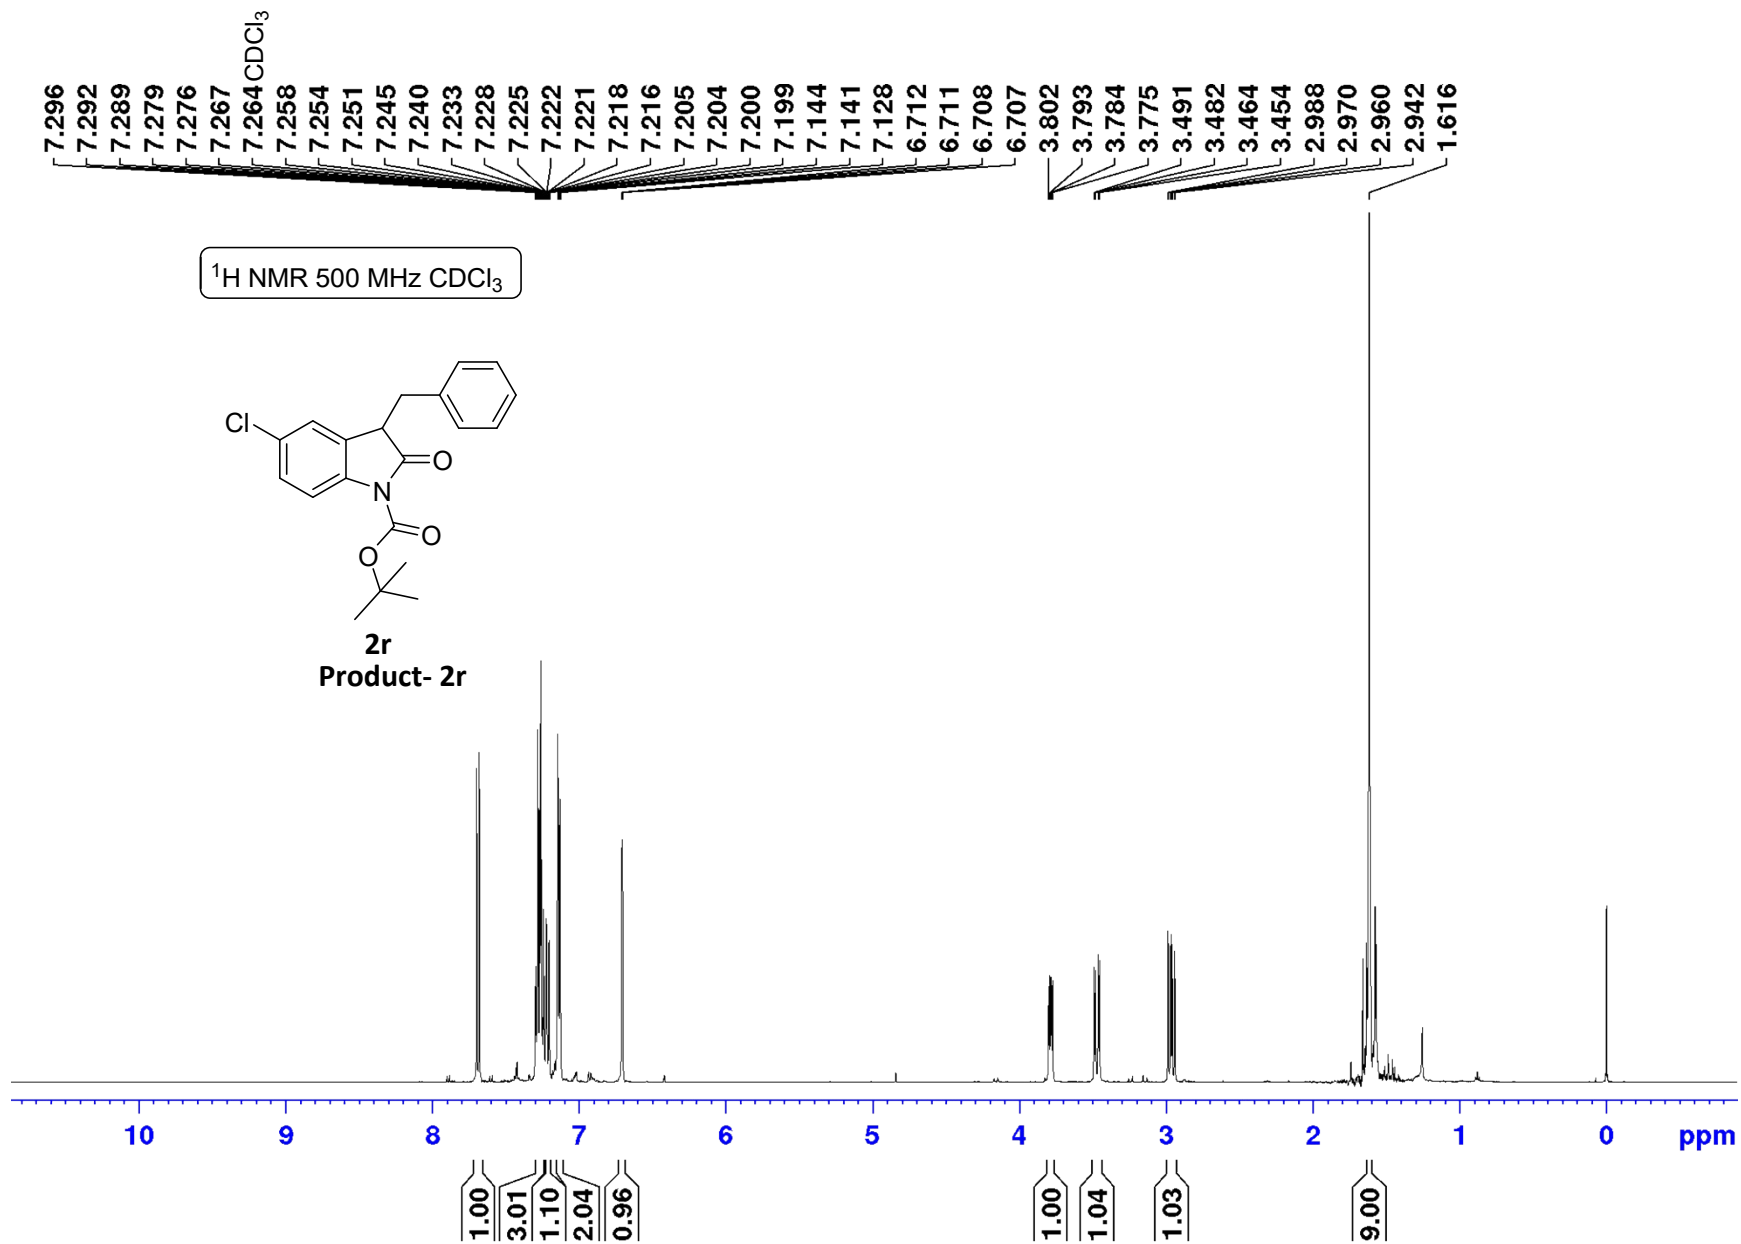

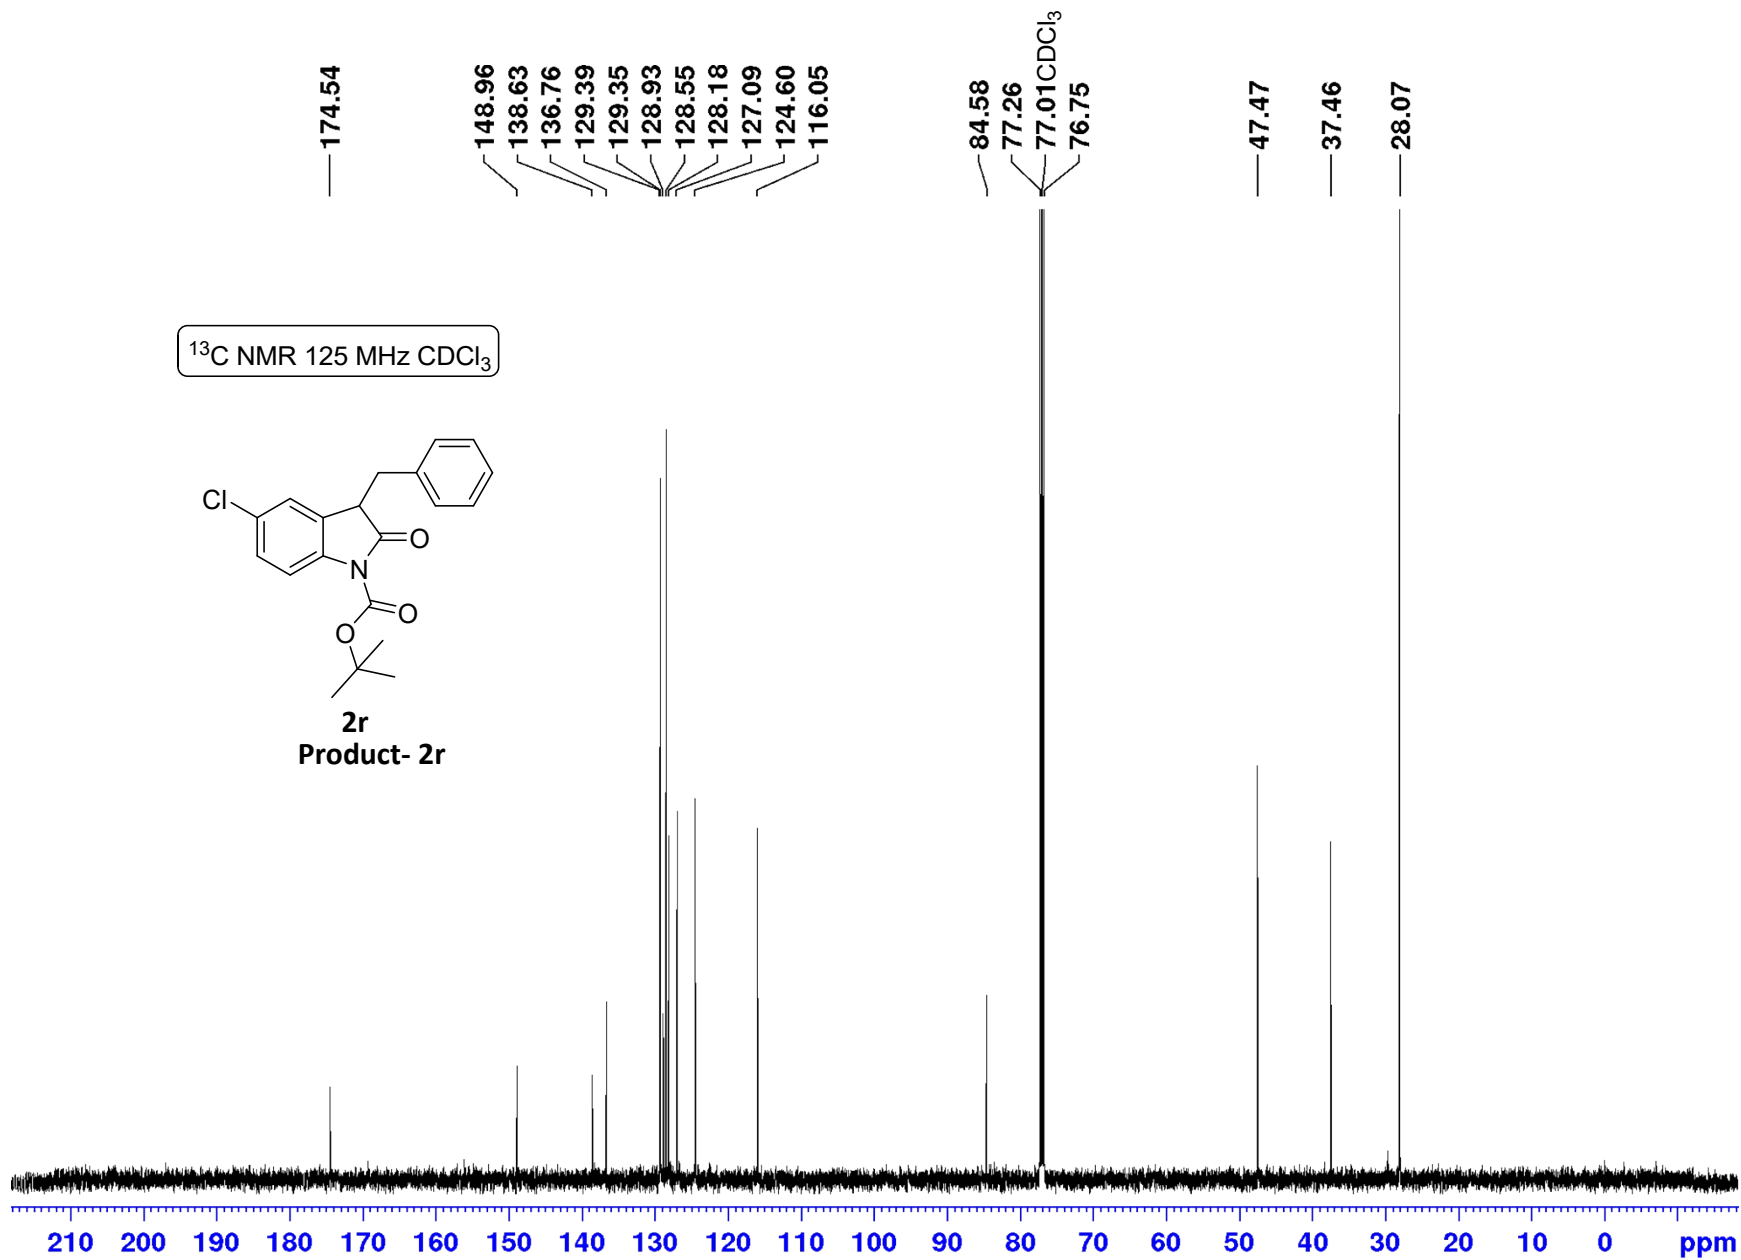

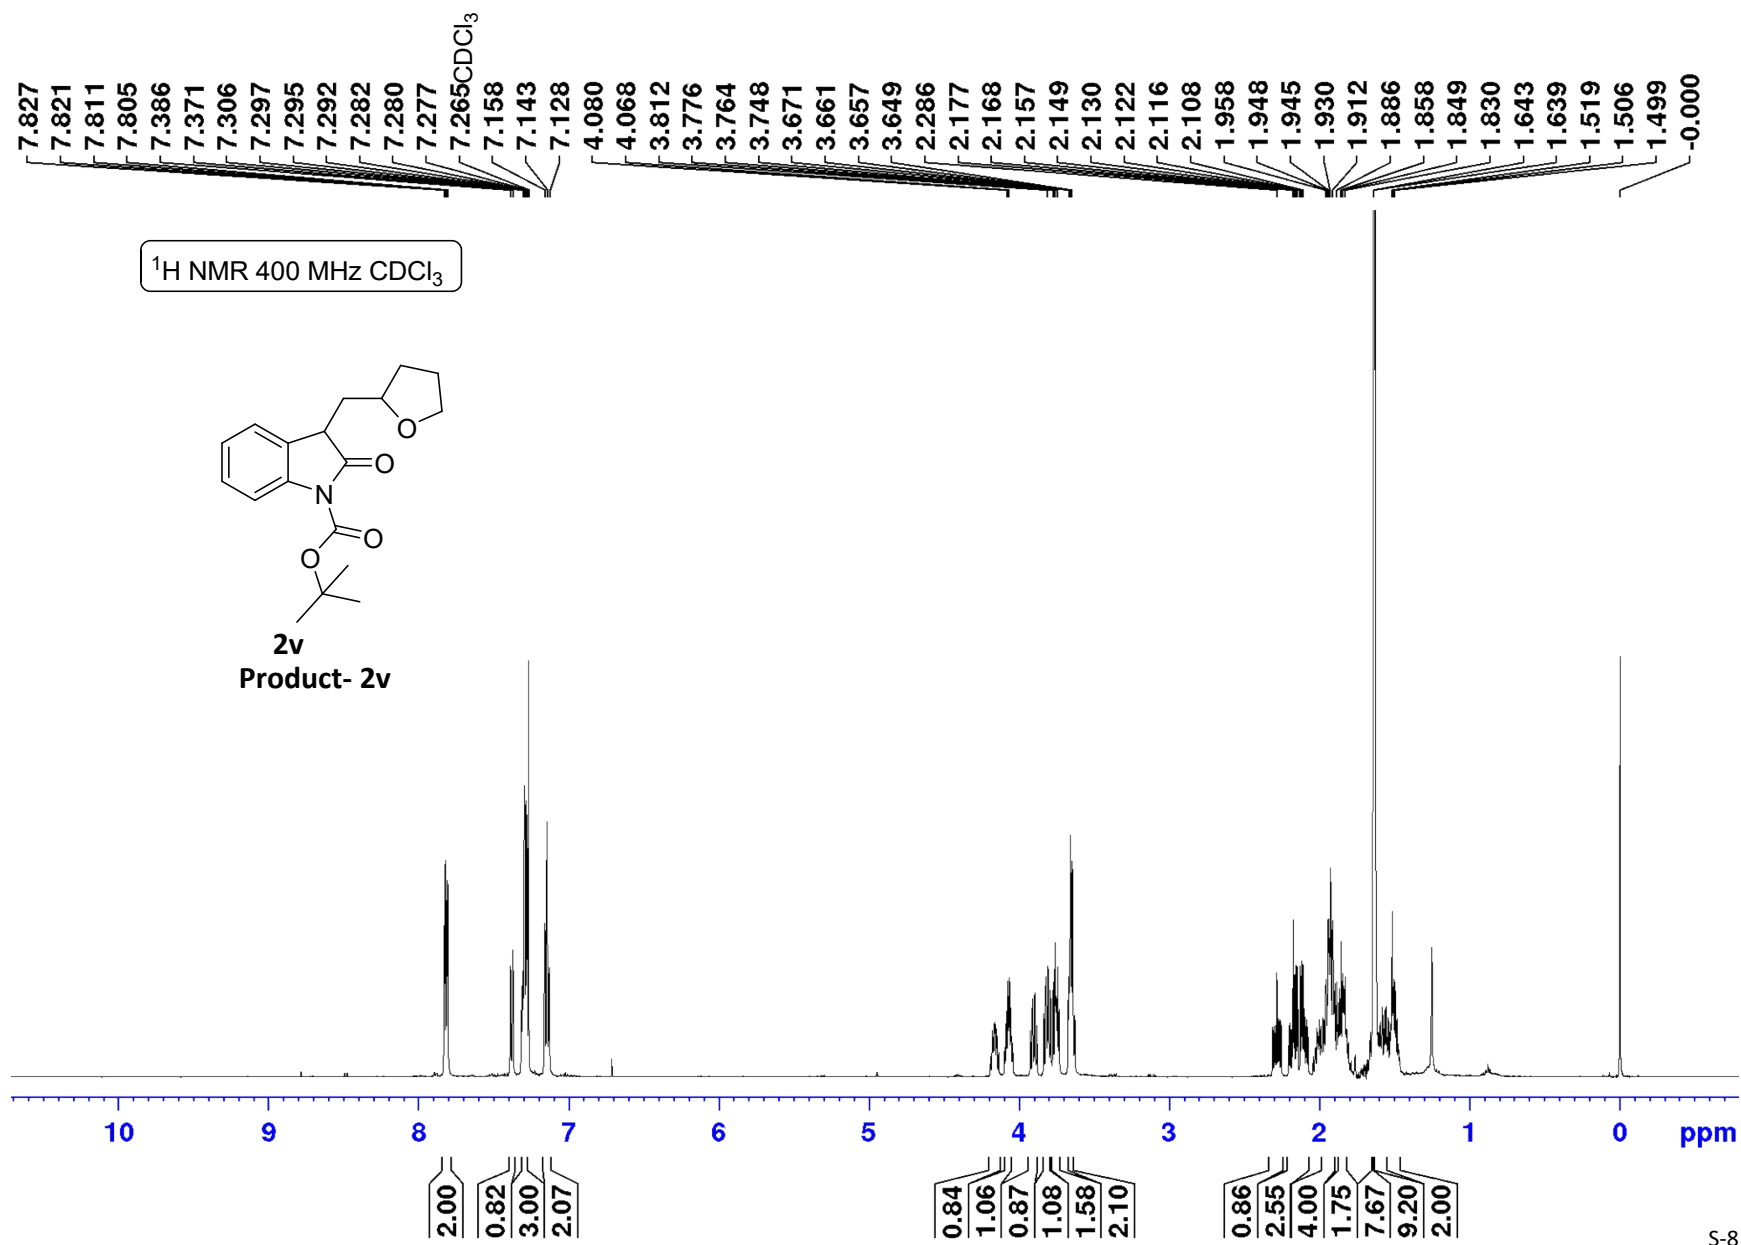



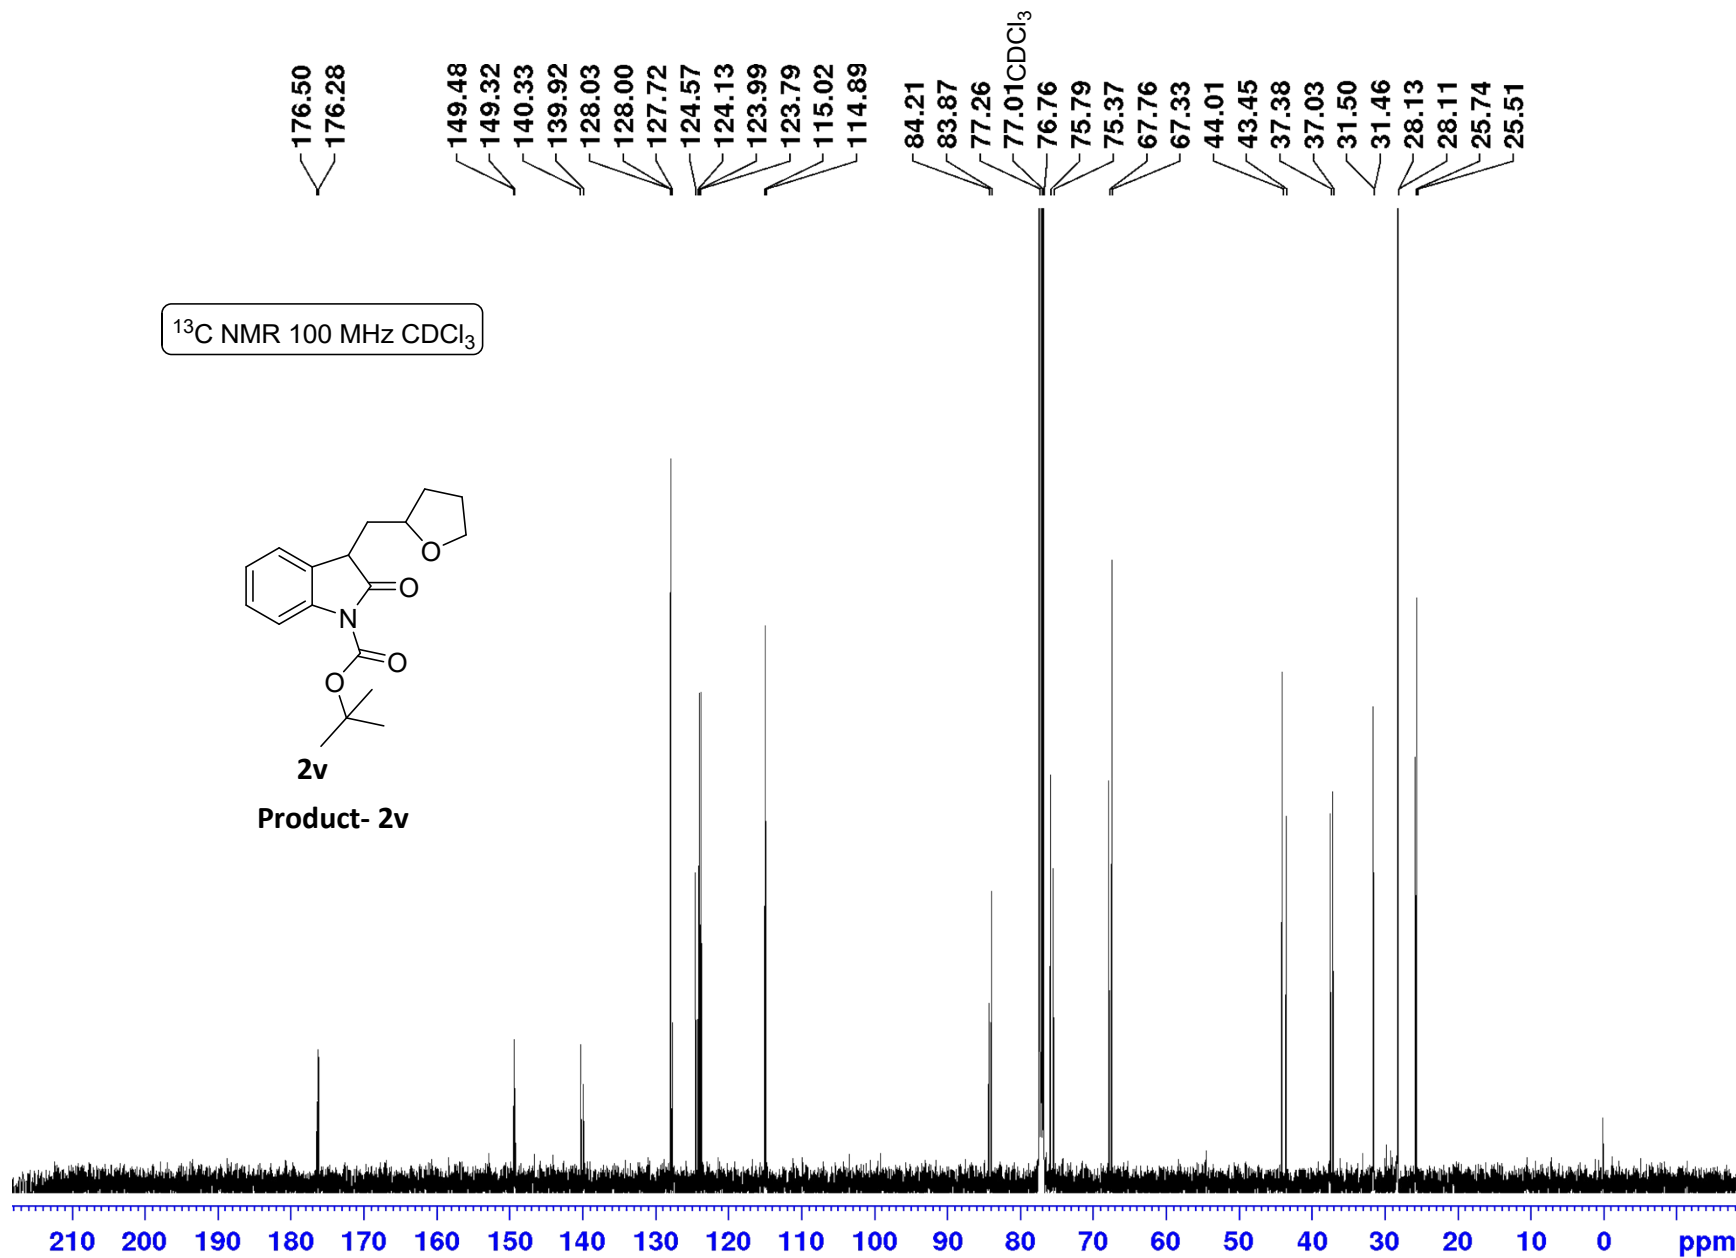

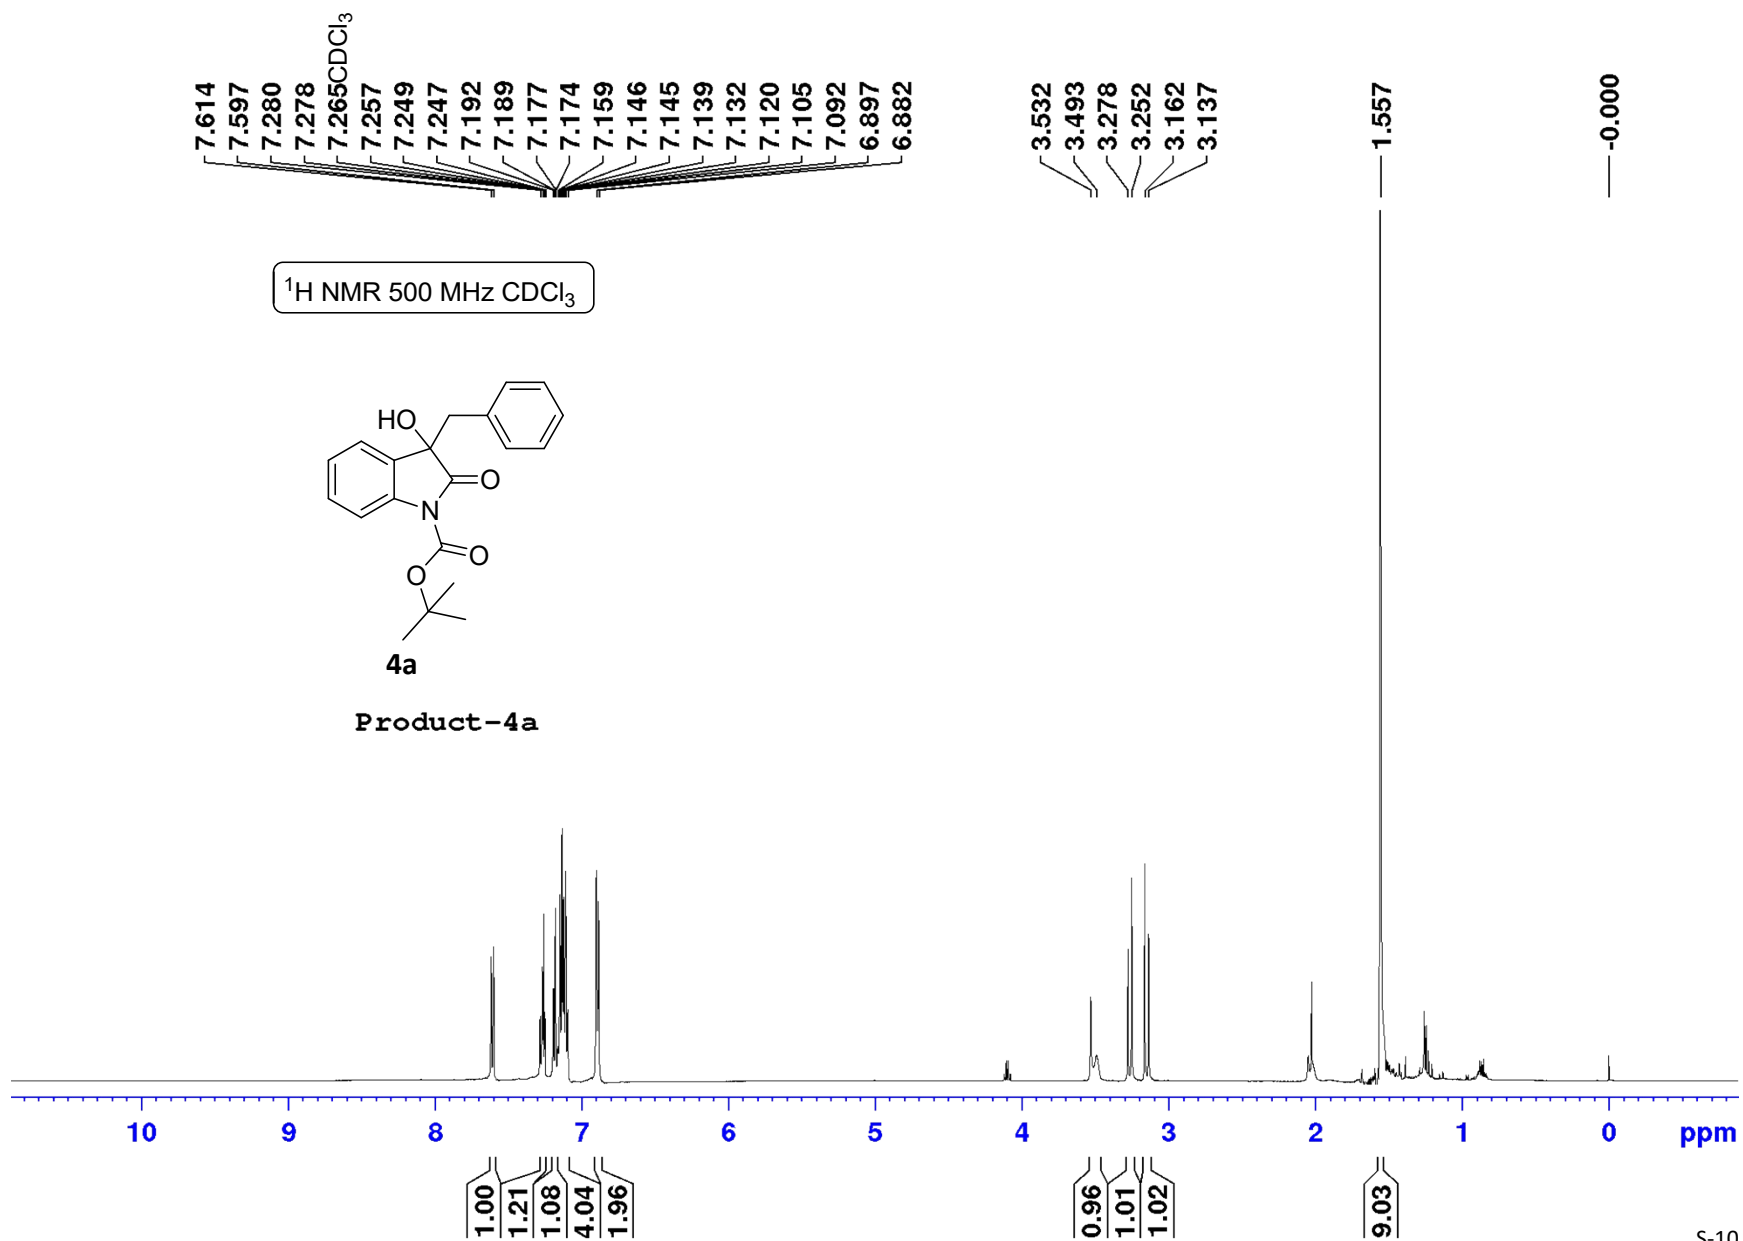

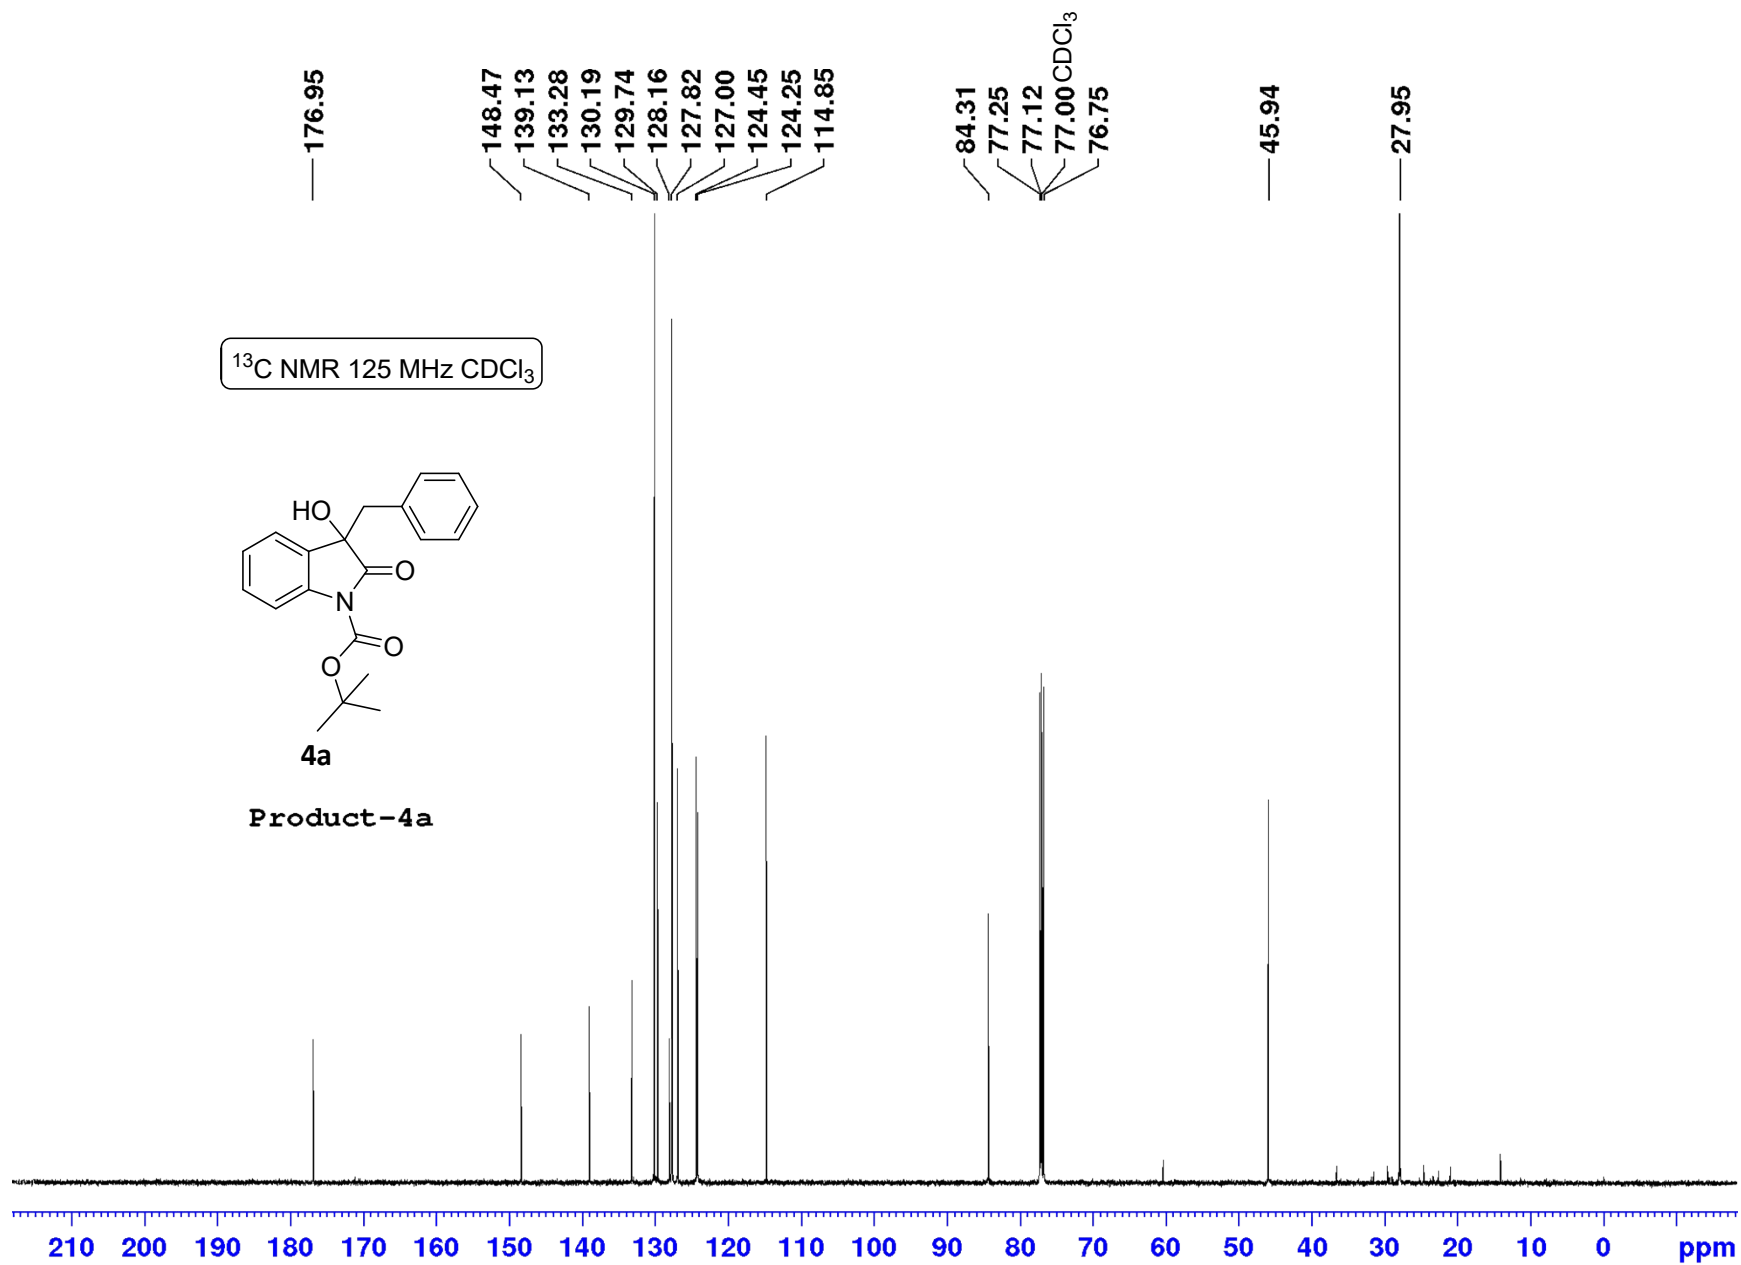

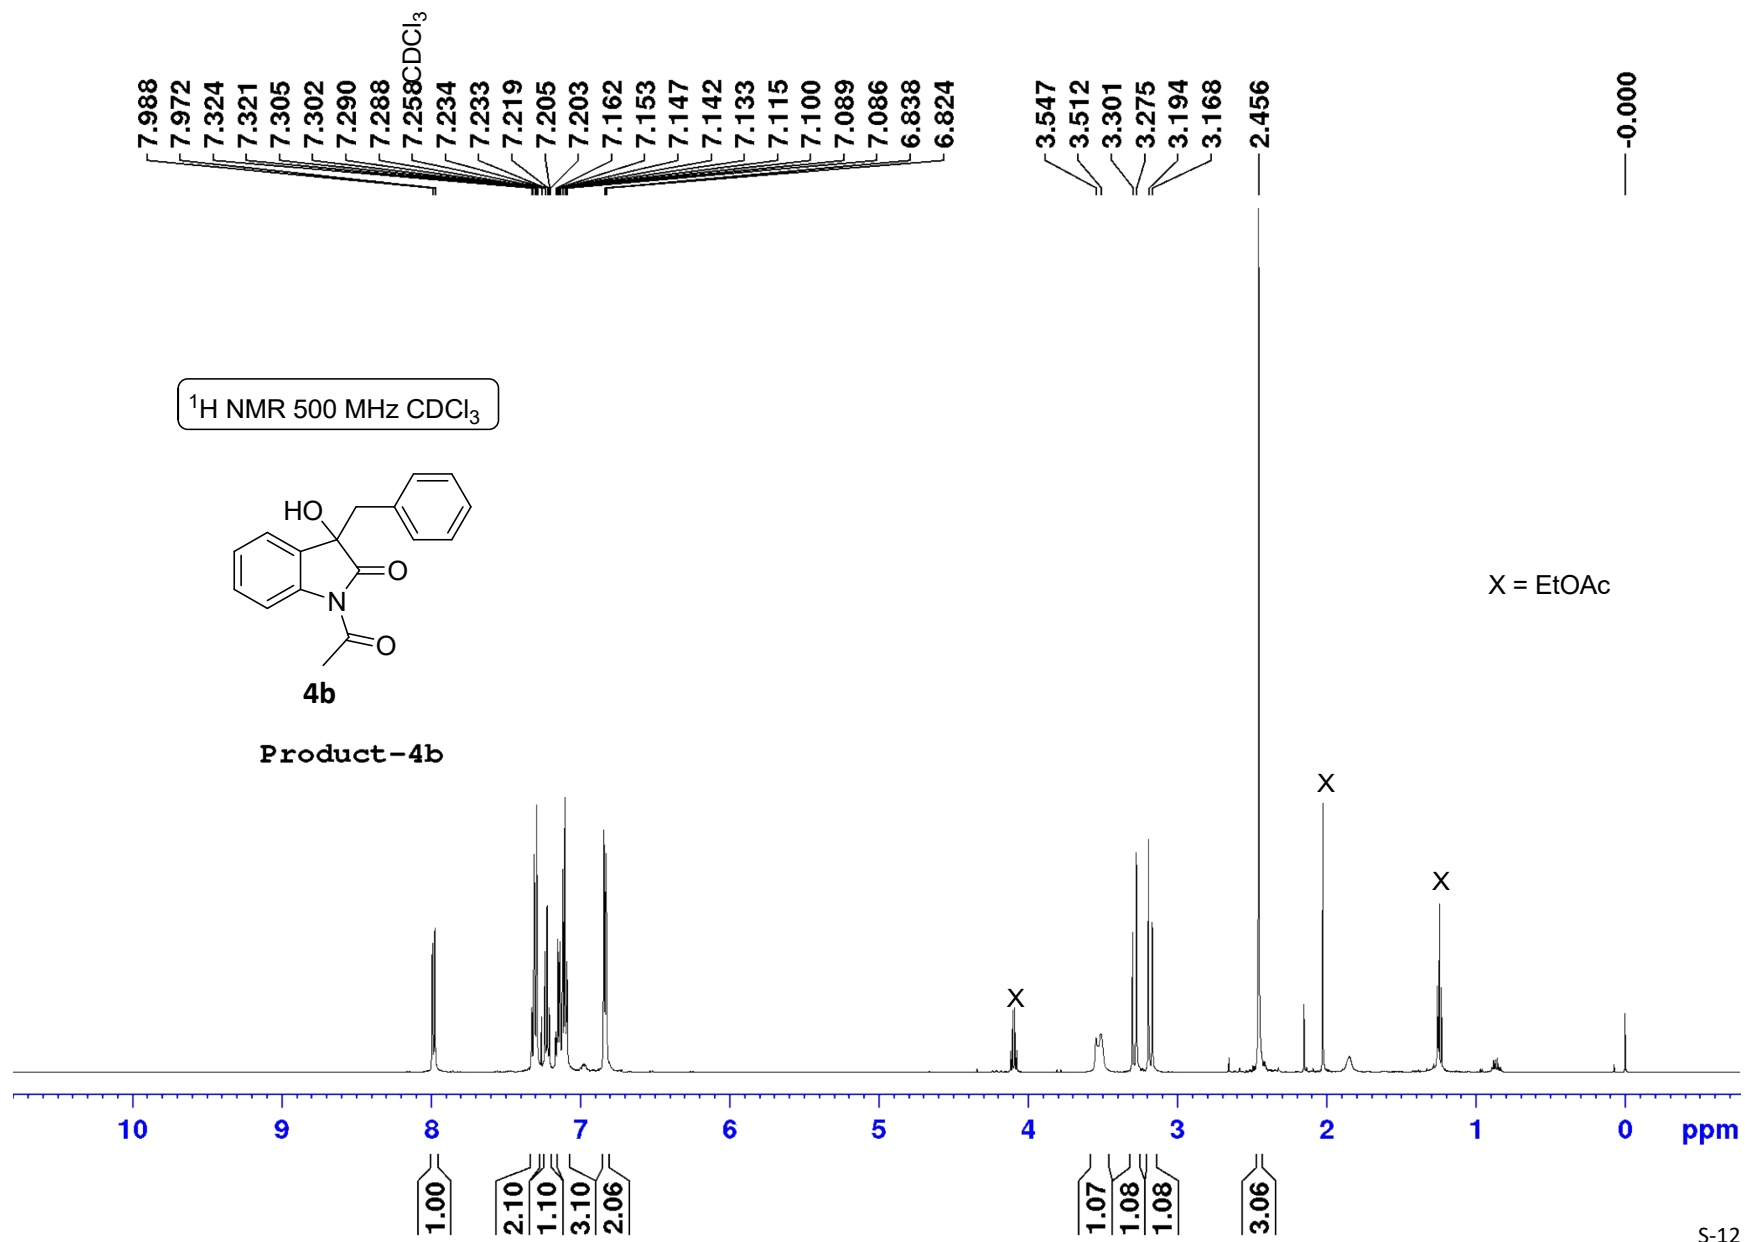

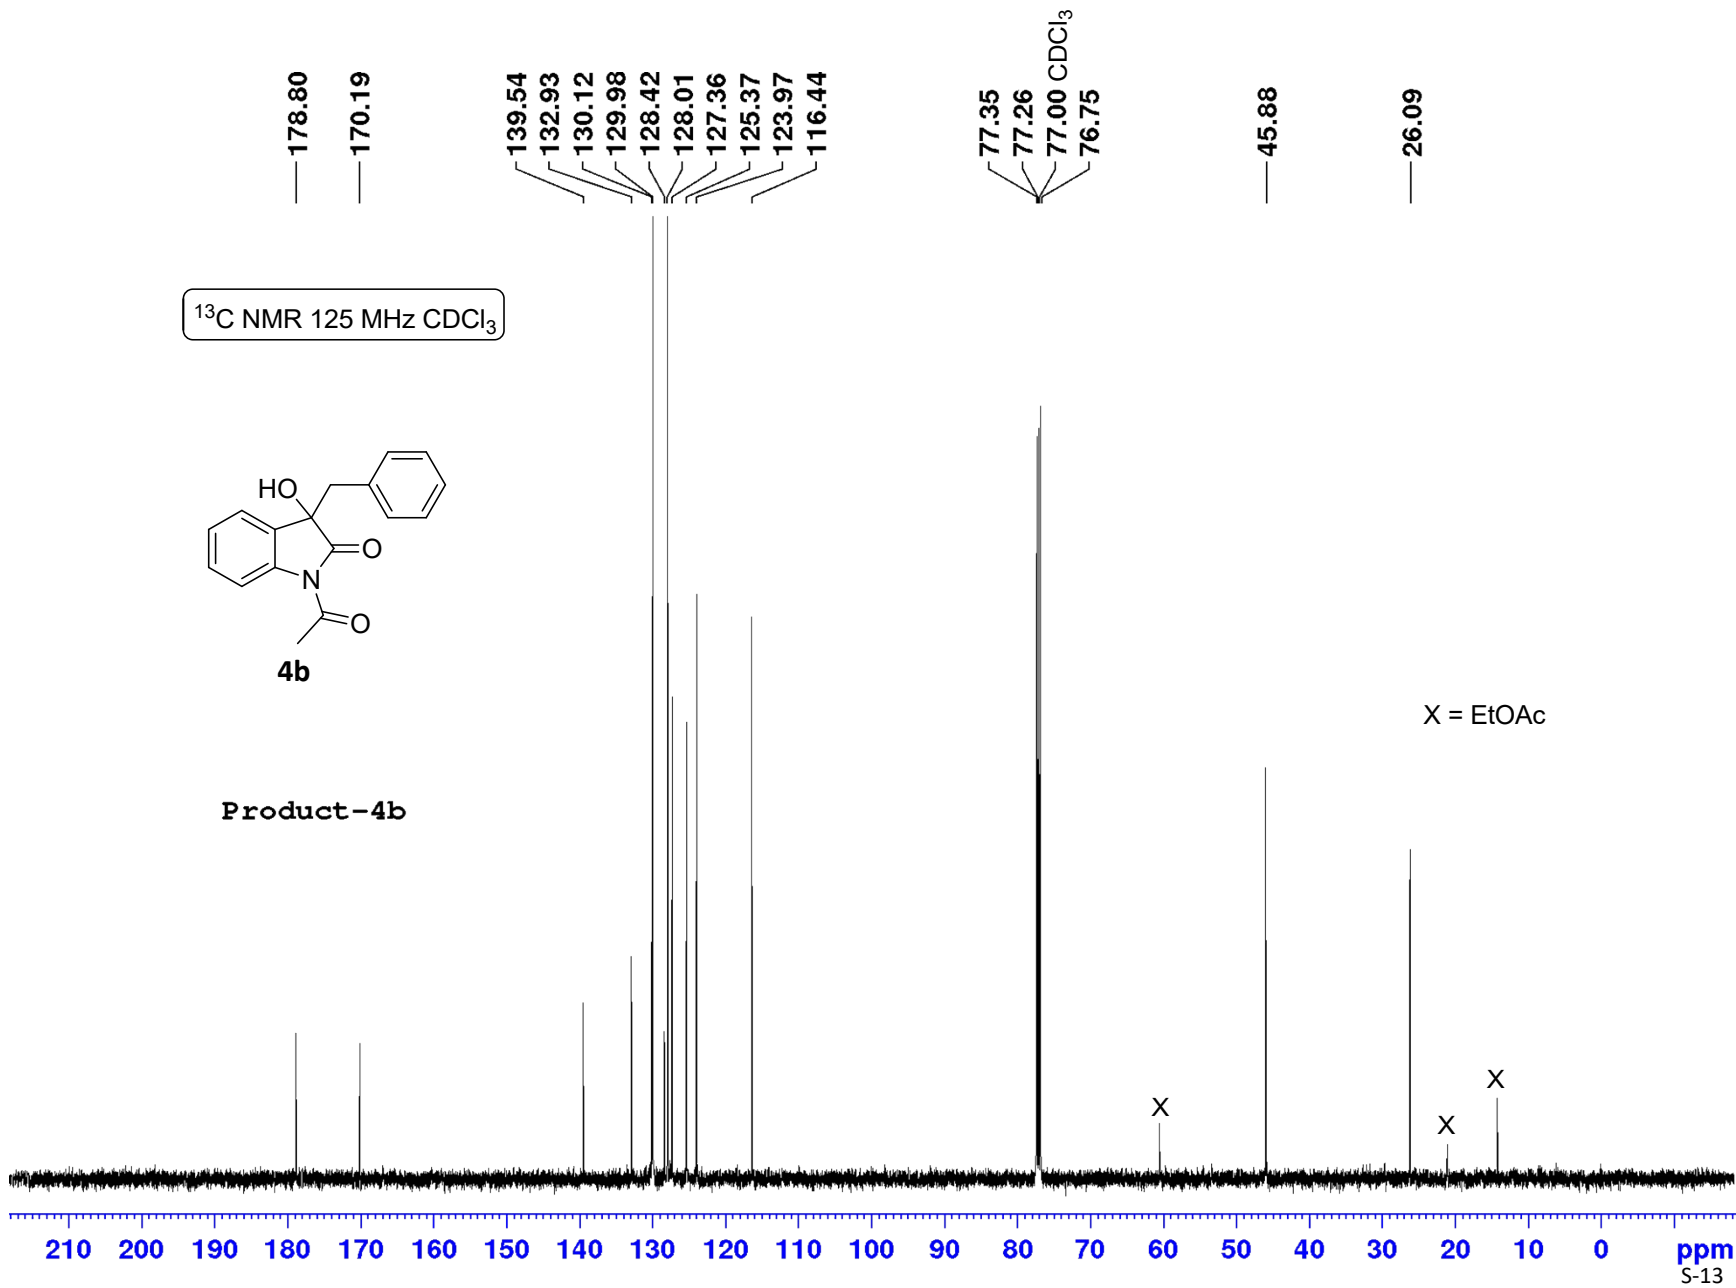

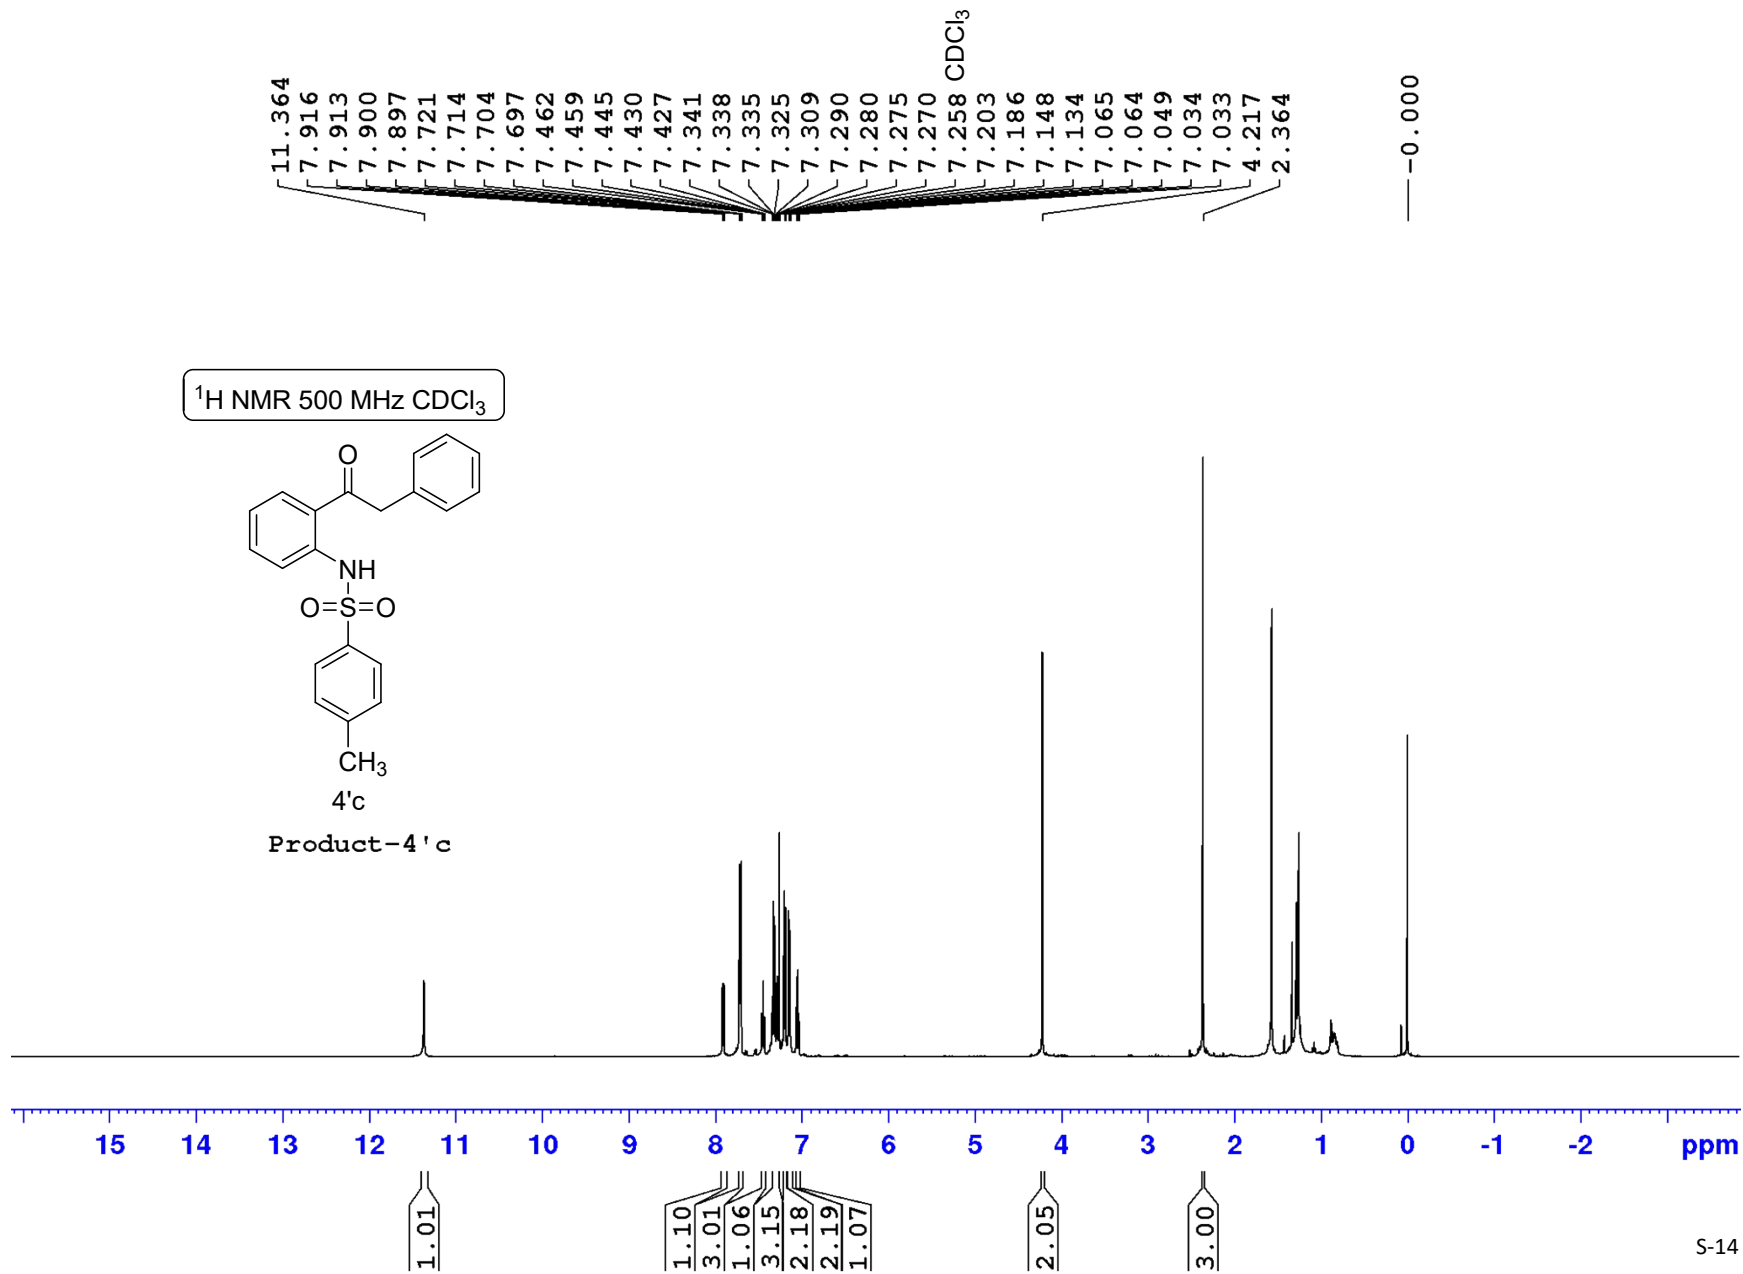

— 201.79

143.77  
140.58  
136.66  
134.92  
133.92  
131.52  
129.60  
129.30  
128.73  
127.23  
127.15  
122.57  
121.75  
119.42

77.25  
77.00 CDCl<sub>3</sub>  
76.74

— 46.41

— 21.49

<sup>13</sup>C NMR 125 MHz CDCl<sub>3</sub>

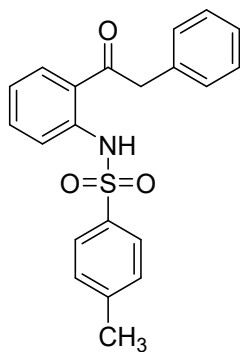

4'c  
Product-4'c

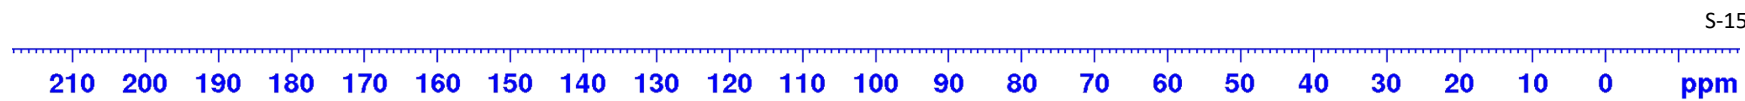

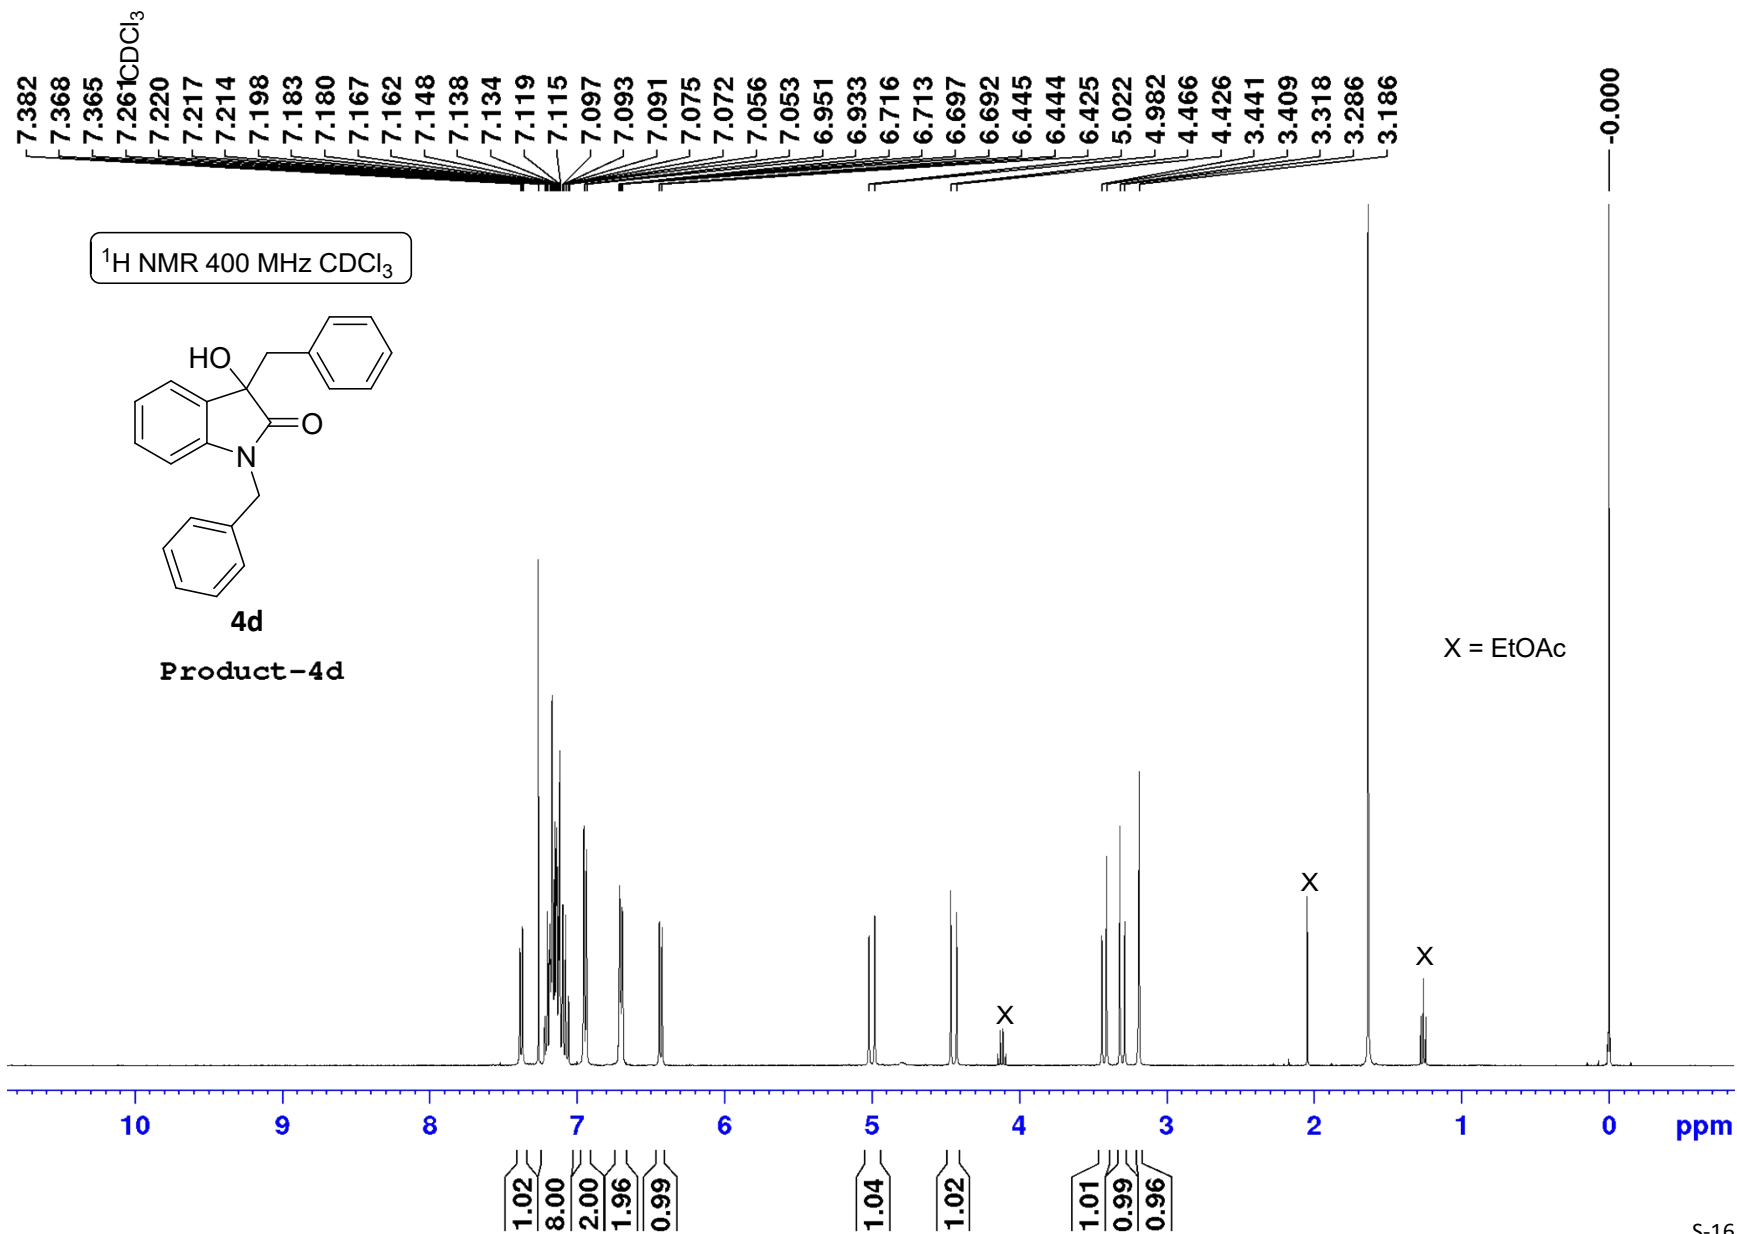



<sup>13</sup>C NMR 100 MHz CDCl<sub>3</sub>

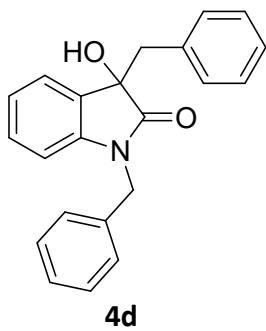

Product-4d

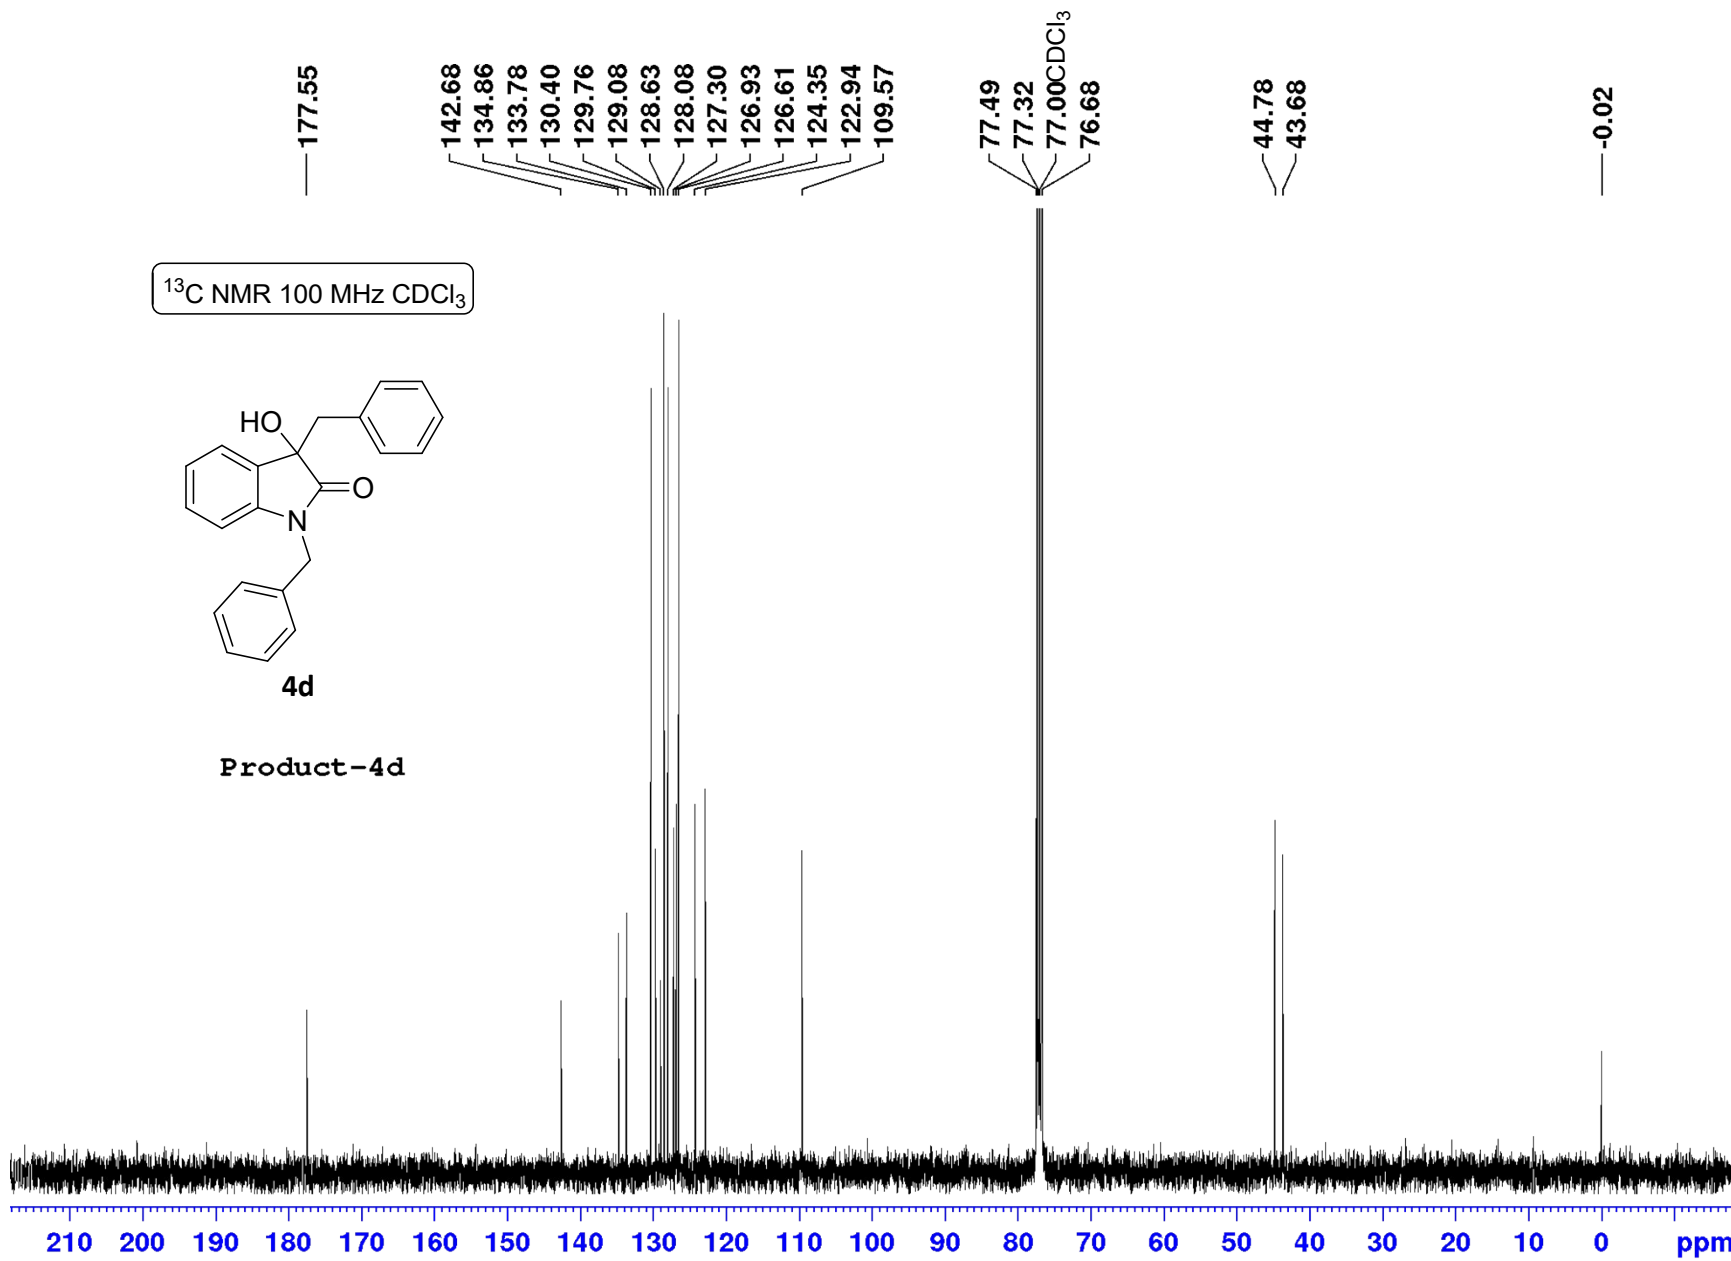

<sup>1</sup>H NMR 400 MHz CDCl<sub>3</sub>

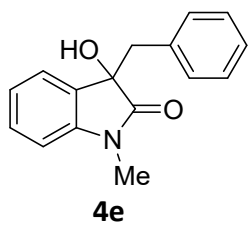

Product-4e

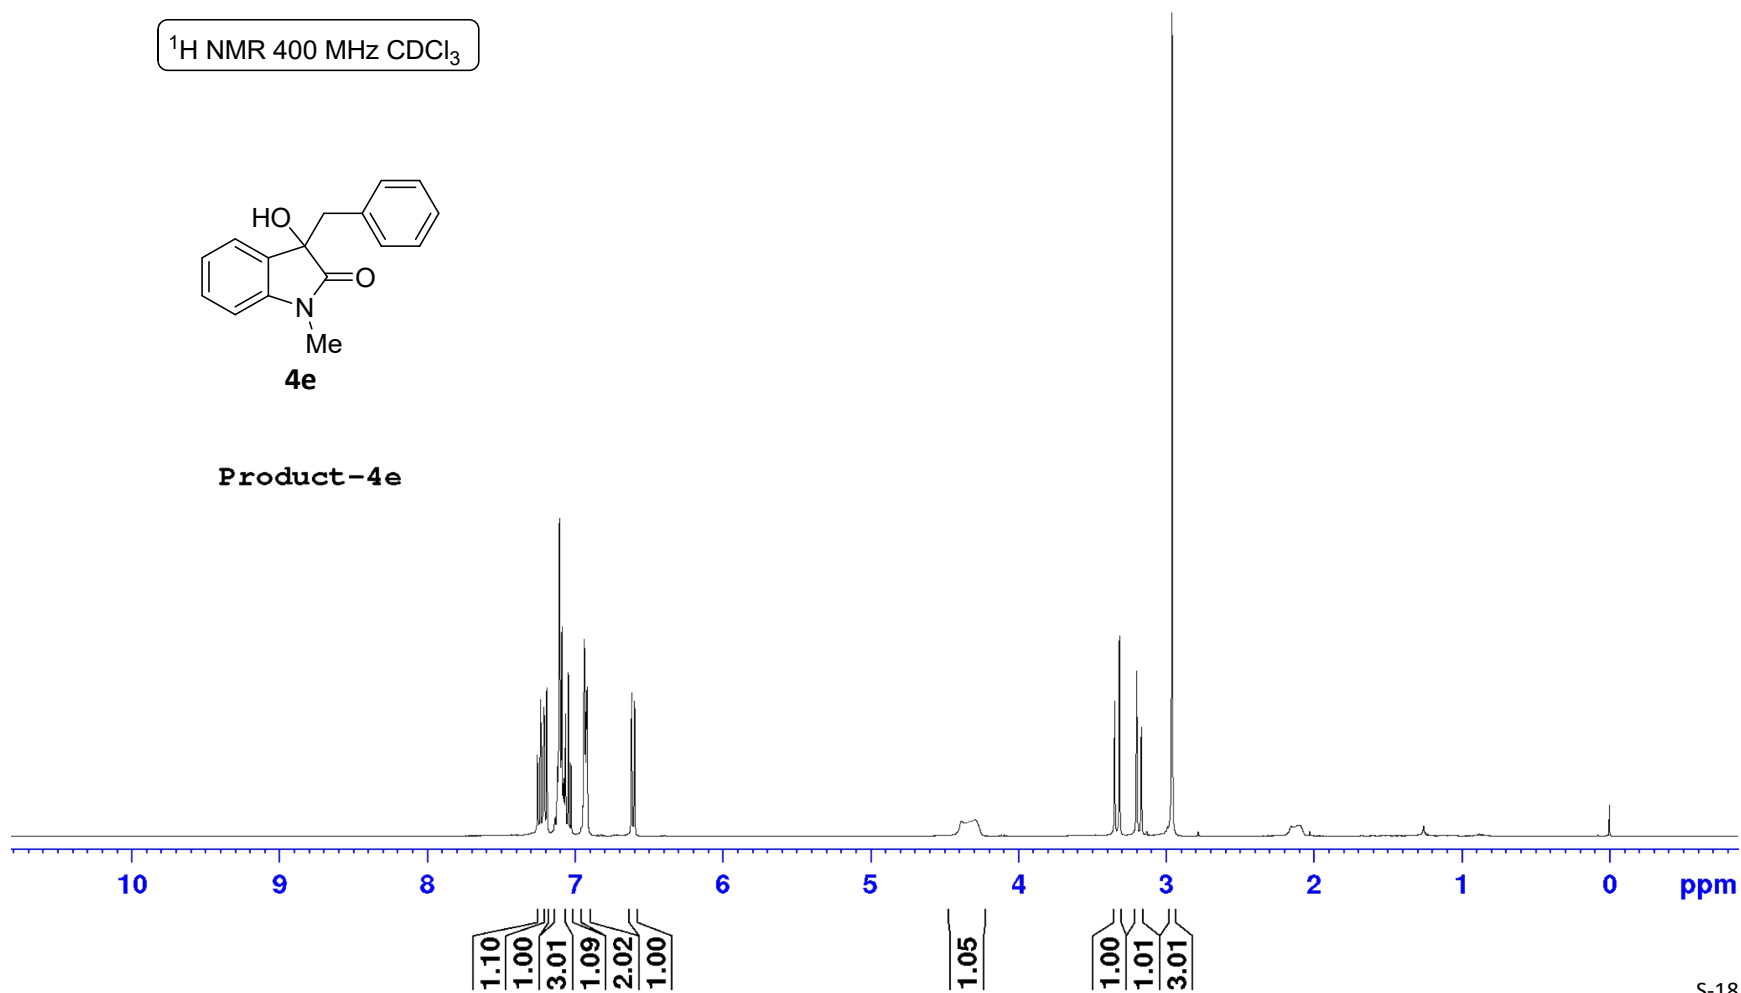

$^{13}\text{C}$  NMR 125 MHz  $\text{CDCl}_3$

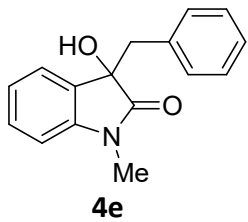

Product-4e

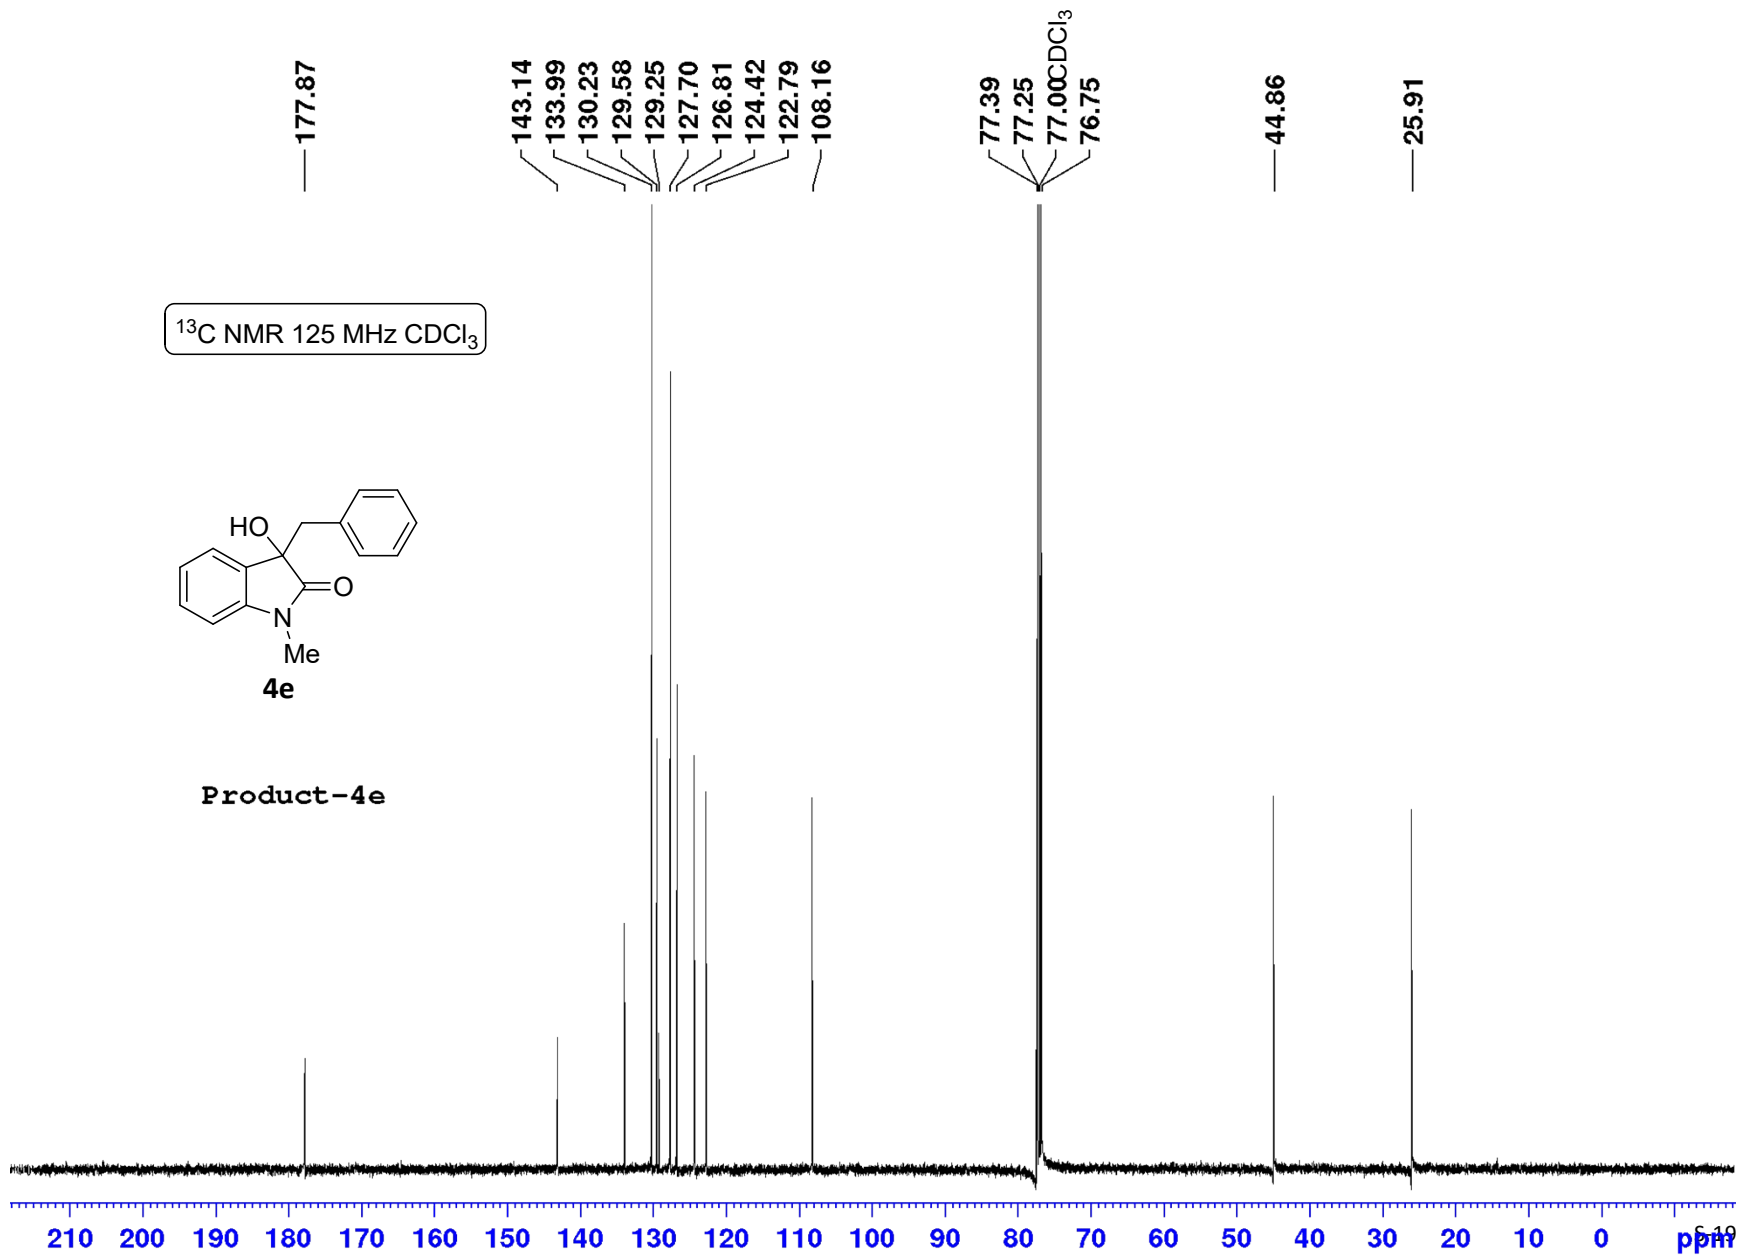

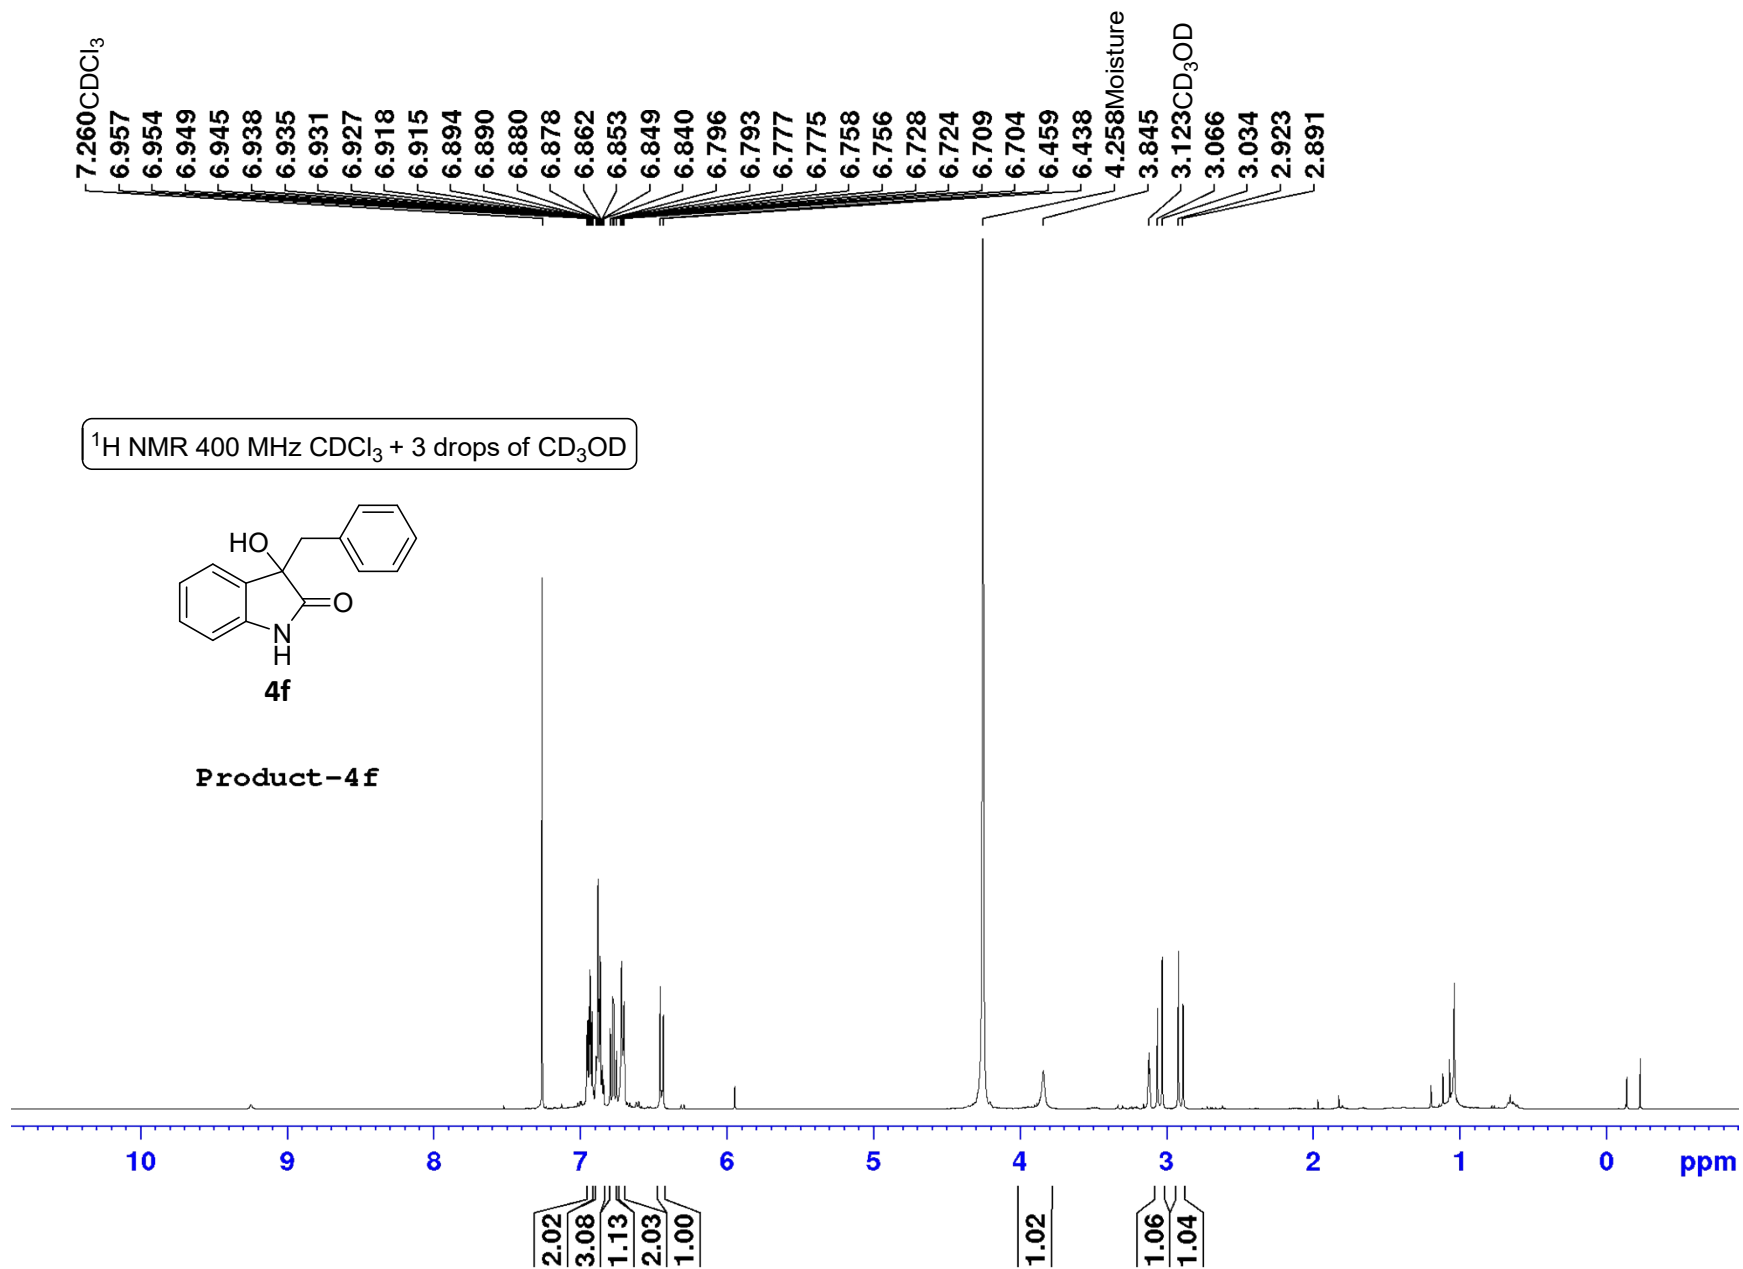

$^{13}\text{C}$  NMR 100 MHz  $\text{CDCl}_3$  + 3 drops of  $\text{CD}_3\text{OD}$

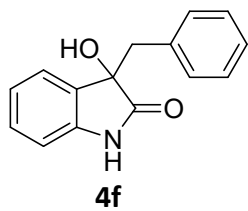

**Product-4f**

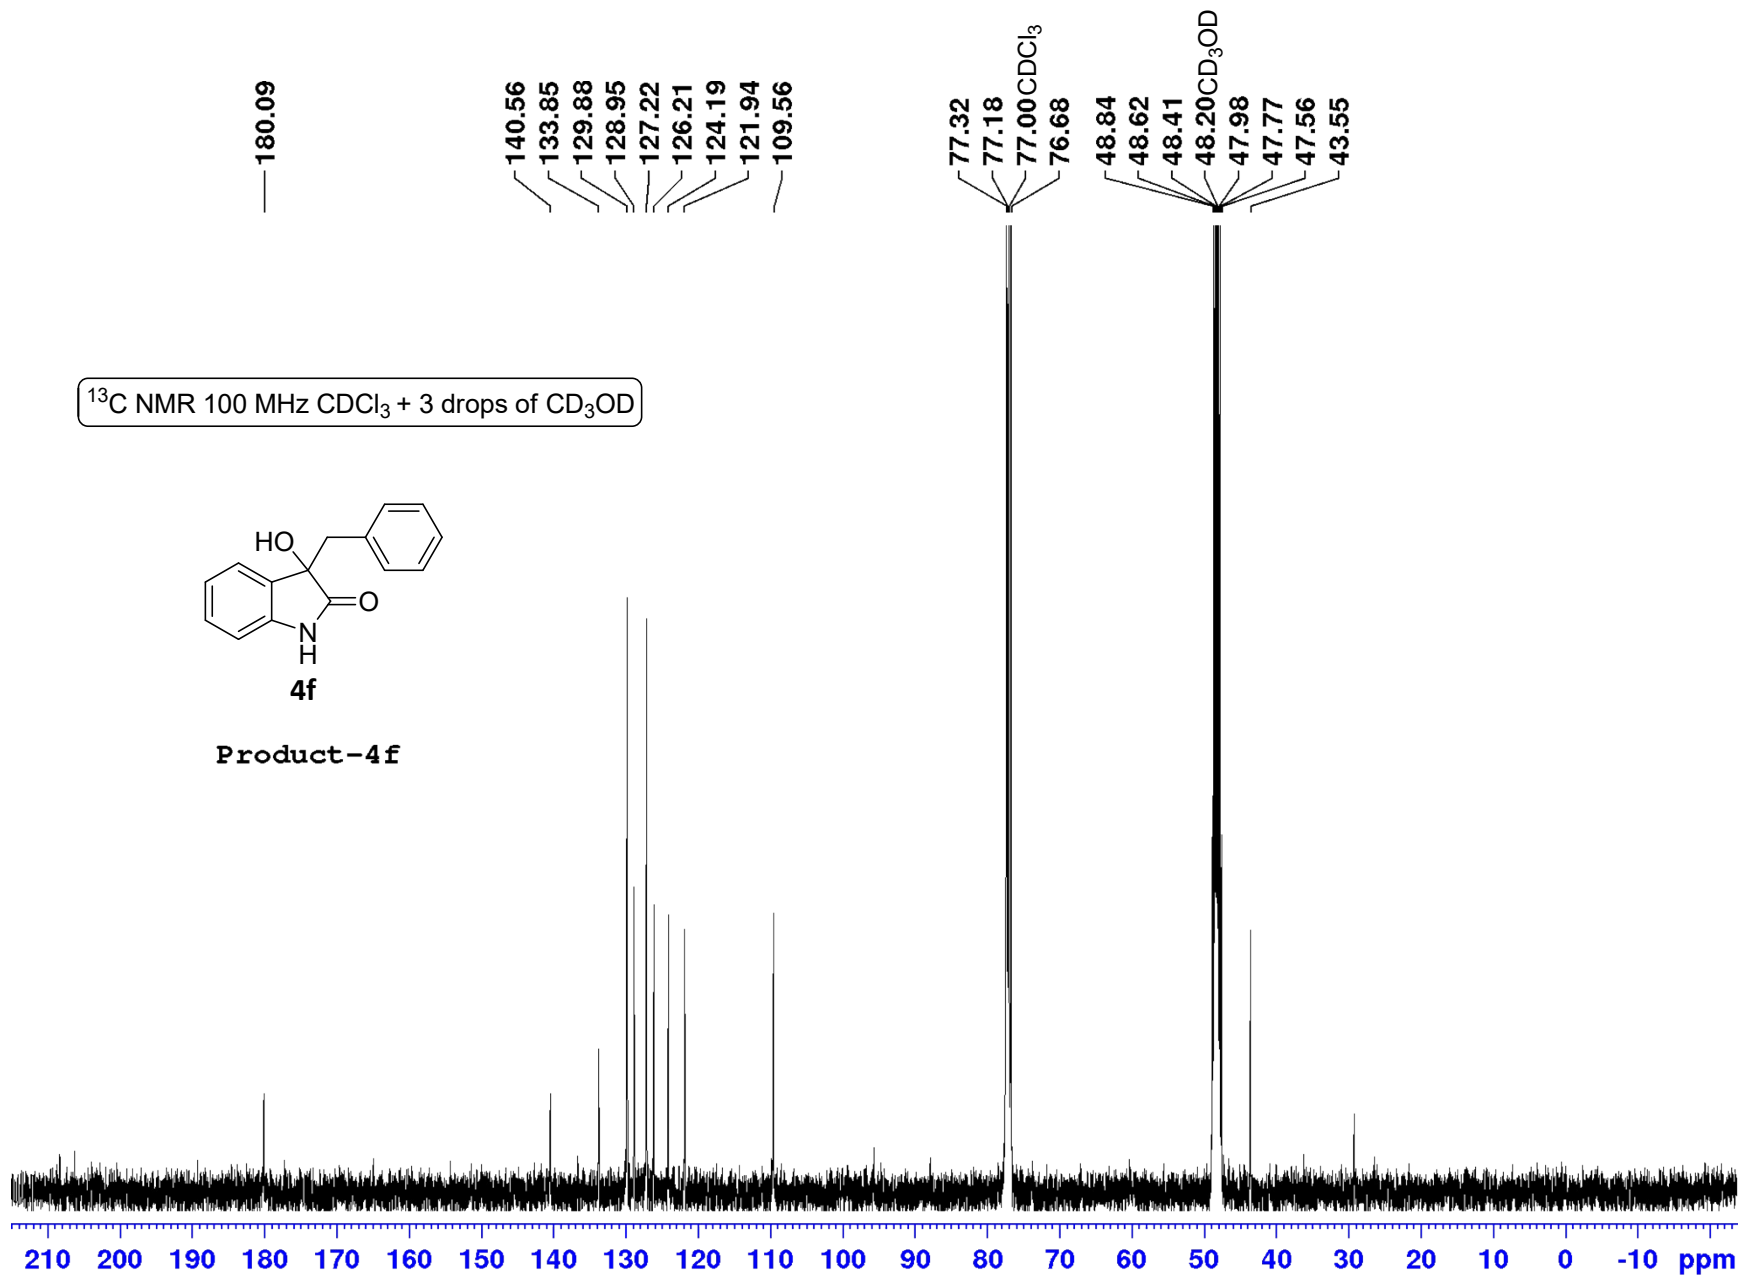

<sup>1</sup>H NMR 500 MHz CDCl<sub>3</sub>

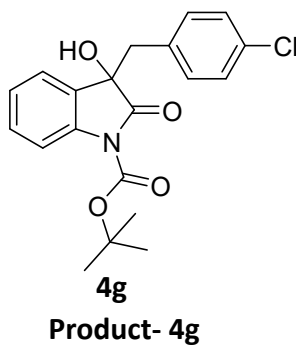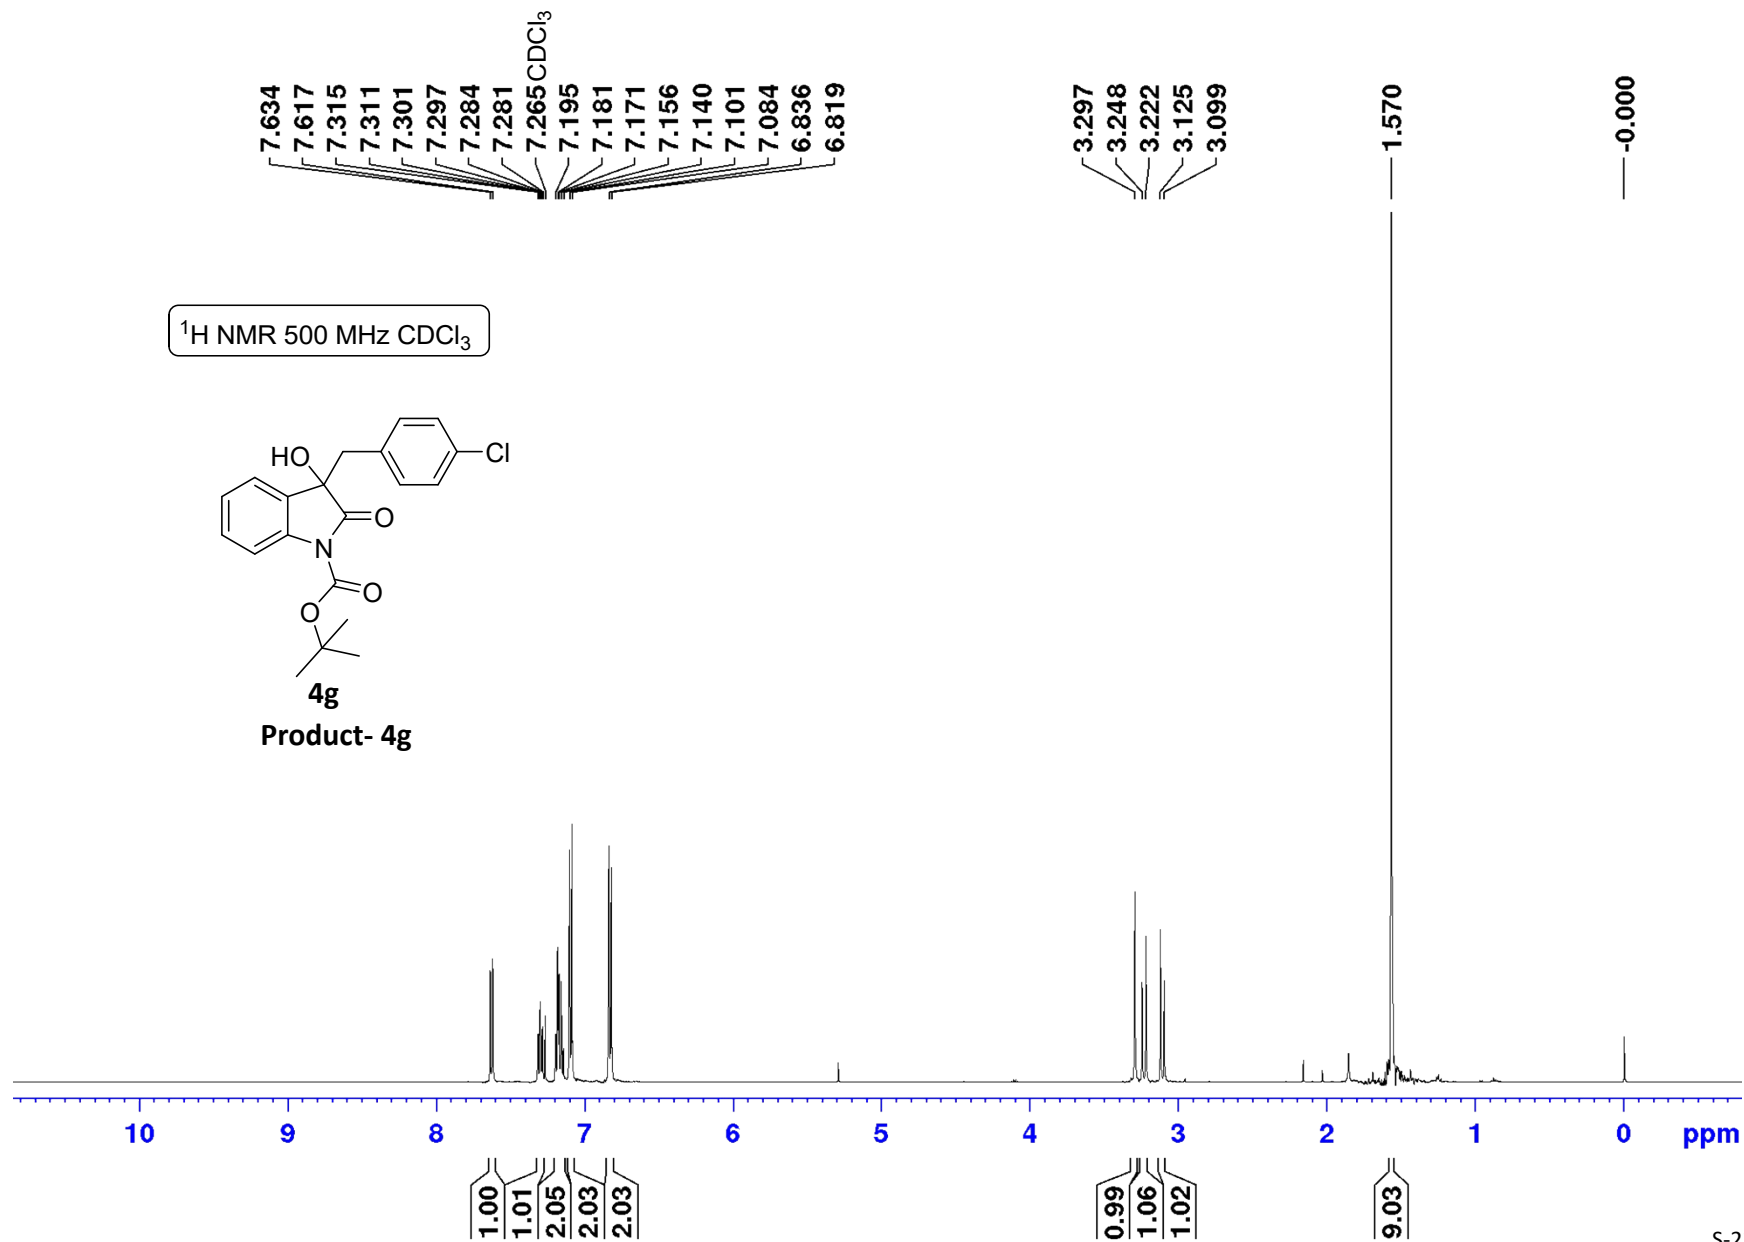

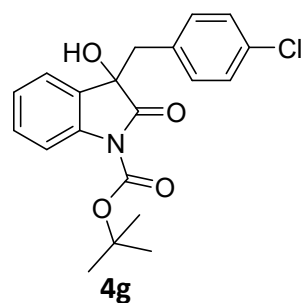

**Product- 4g**

$^{13}\text{C}$  NMR 125 MHz  $\text{CDCl}_3$

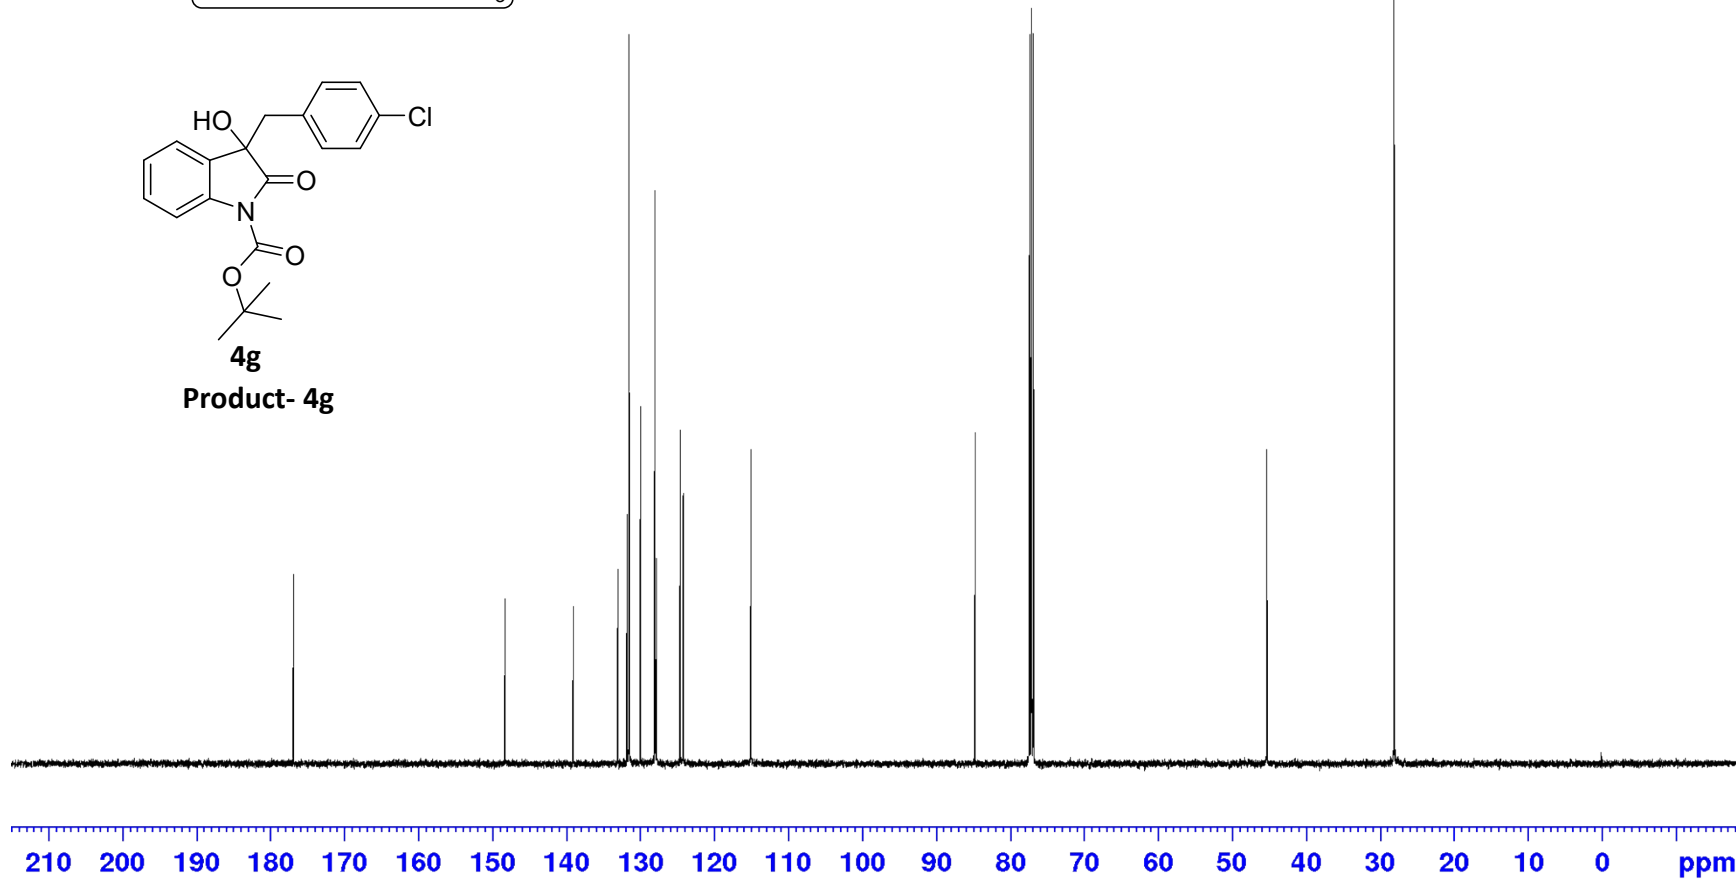

7.635  
7.619  
7.318  
7.314  
7.304  
7.301  
7.288  
7.284  
7.265 CDCl<sub>3</sub>  
7.256  
7.252  
7.242  
7.239  
7.193  
7.190  
7.179  
7.175  
7.172  
7.156  
7.141  
6.779  
6.762

3.308  
3.231  
3.205  
3.107  
3.081

1.574

-0.000

<sup>1</sup>H NMR 500 MHz CDCl<sub>3</sub>

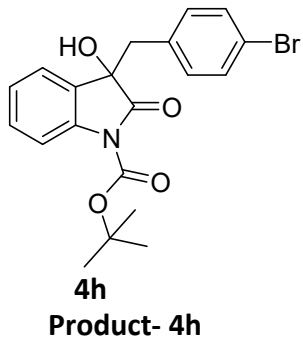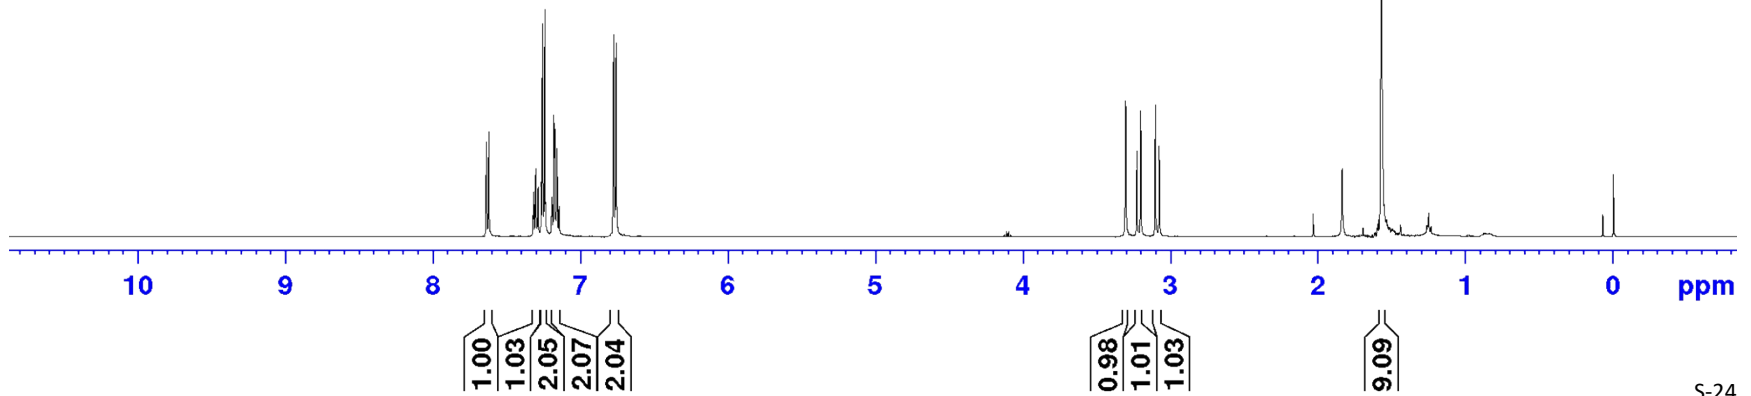



<sup>13</sup>C NMR 125 MHz CDCl<sub>3</sub>

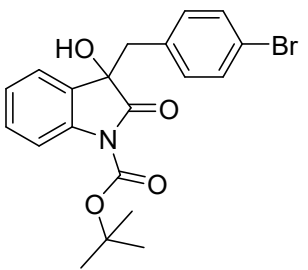

**4h**  
**Product- 4h**

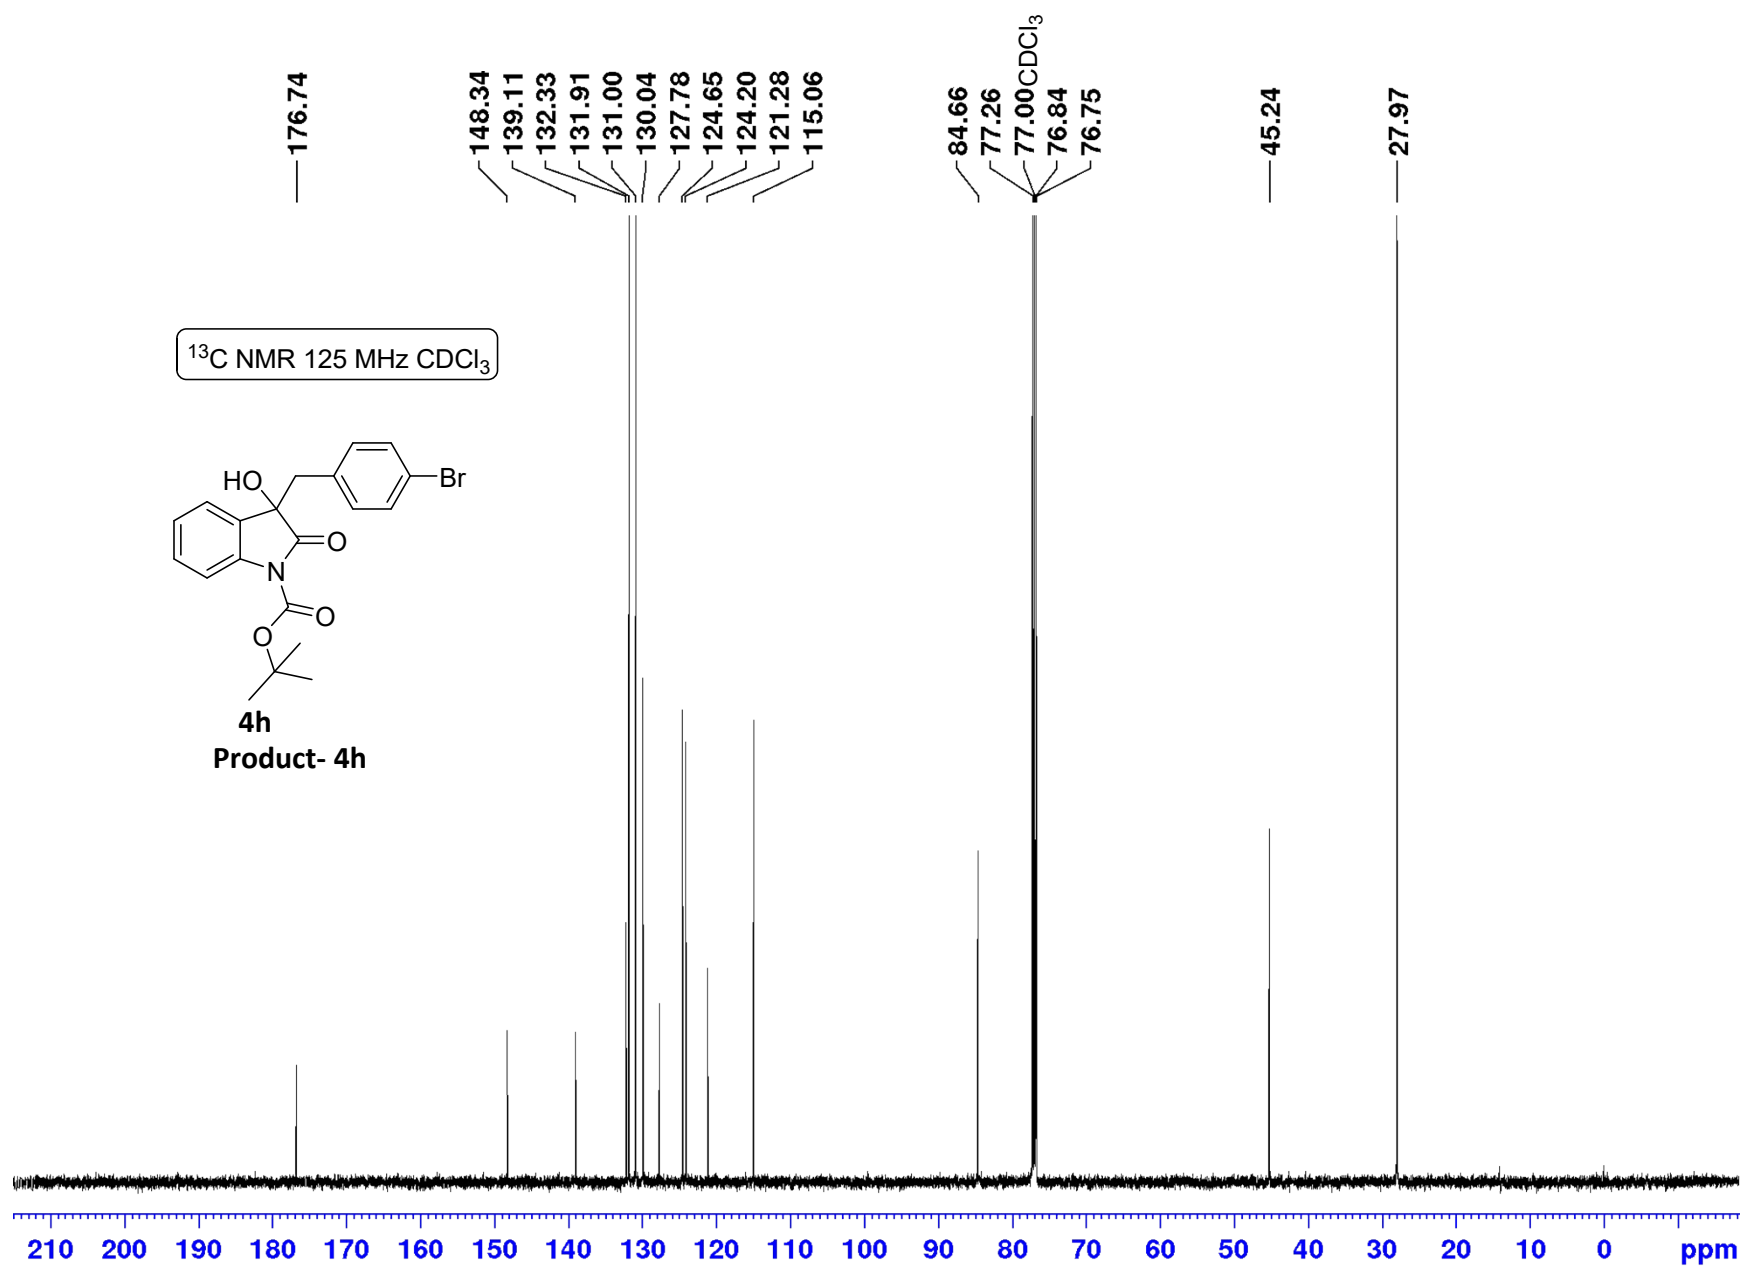

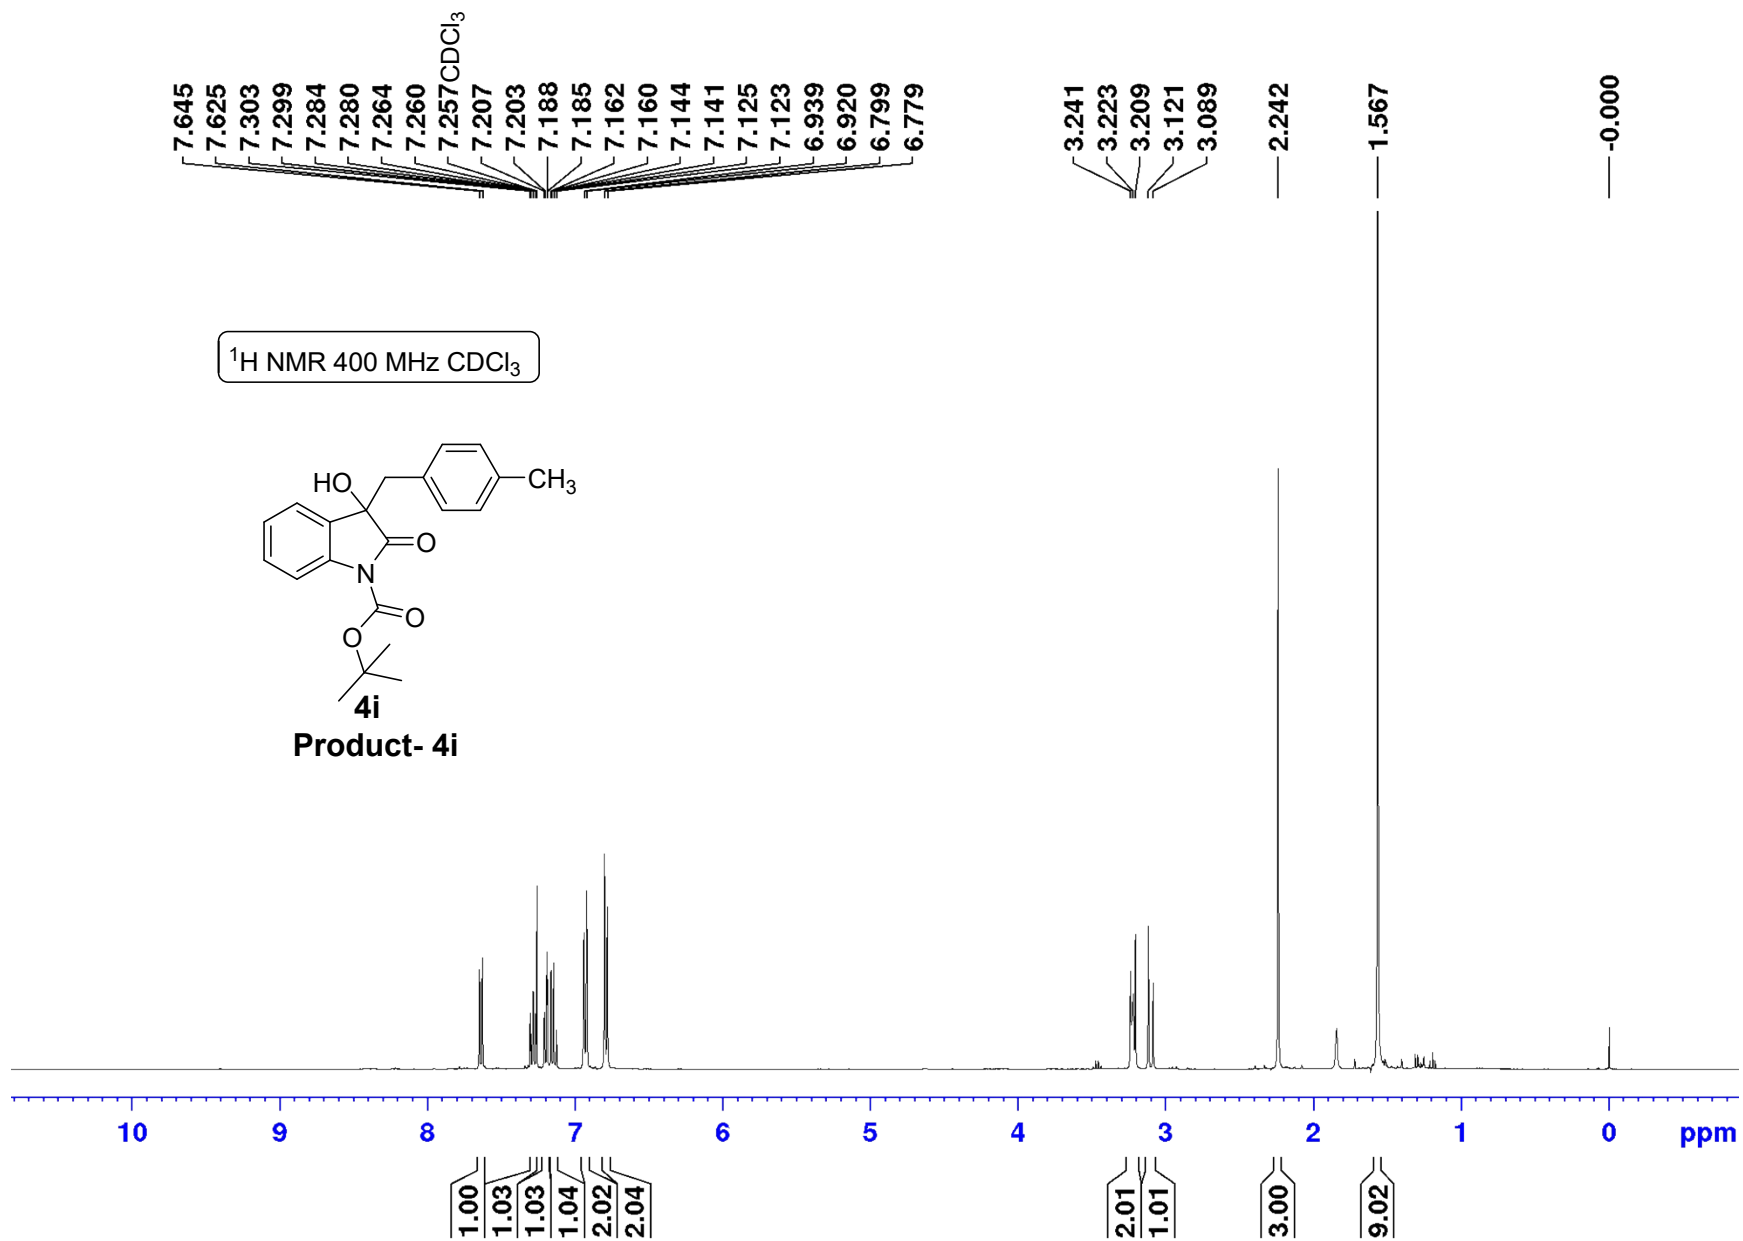

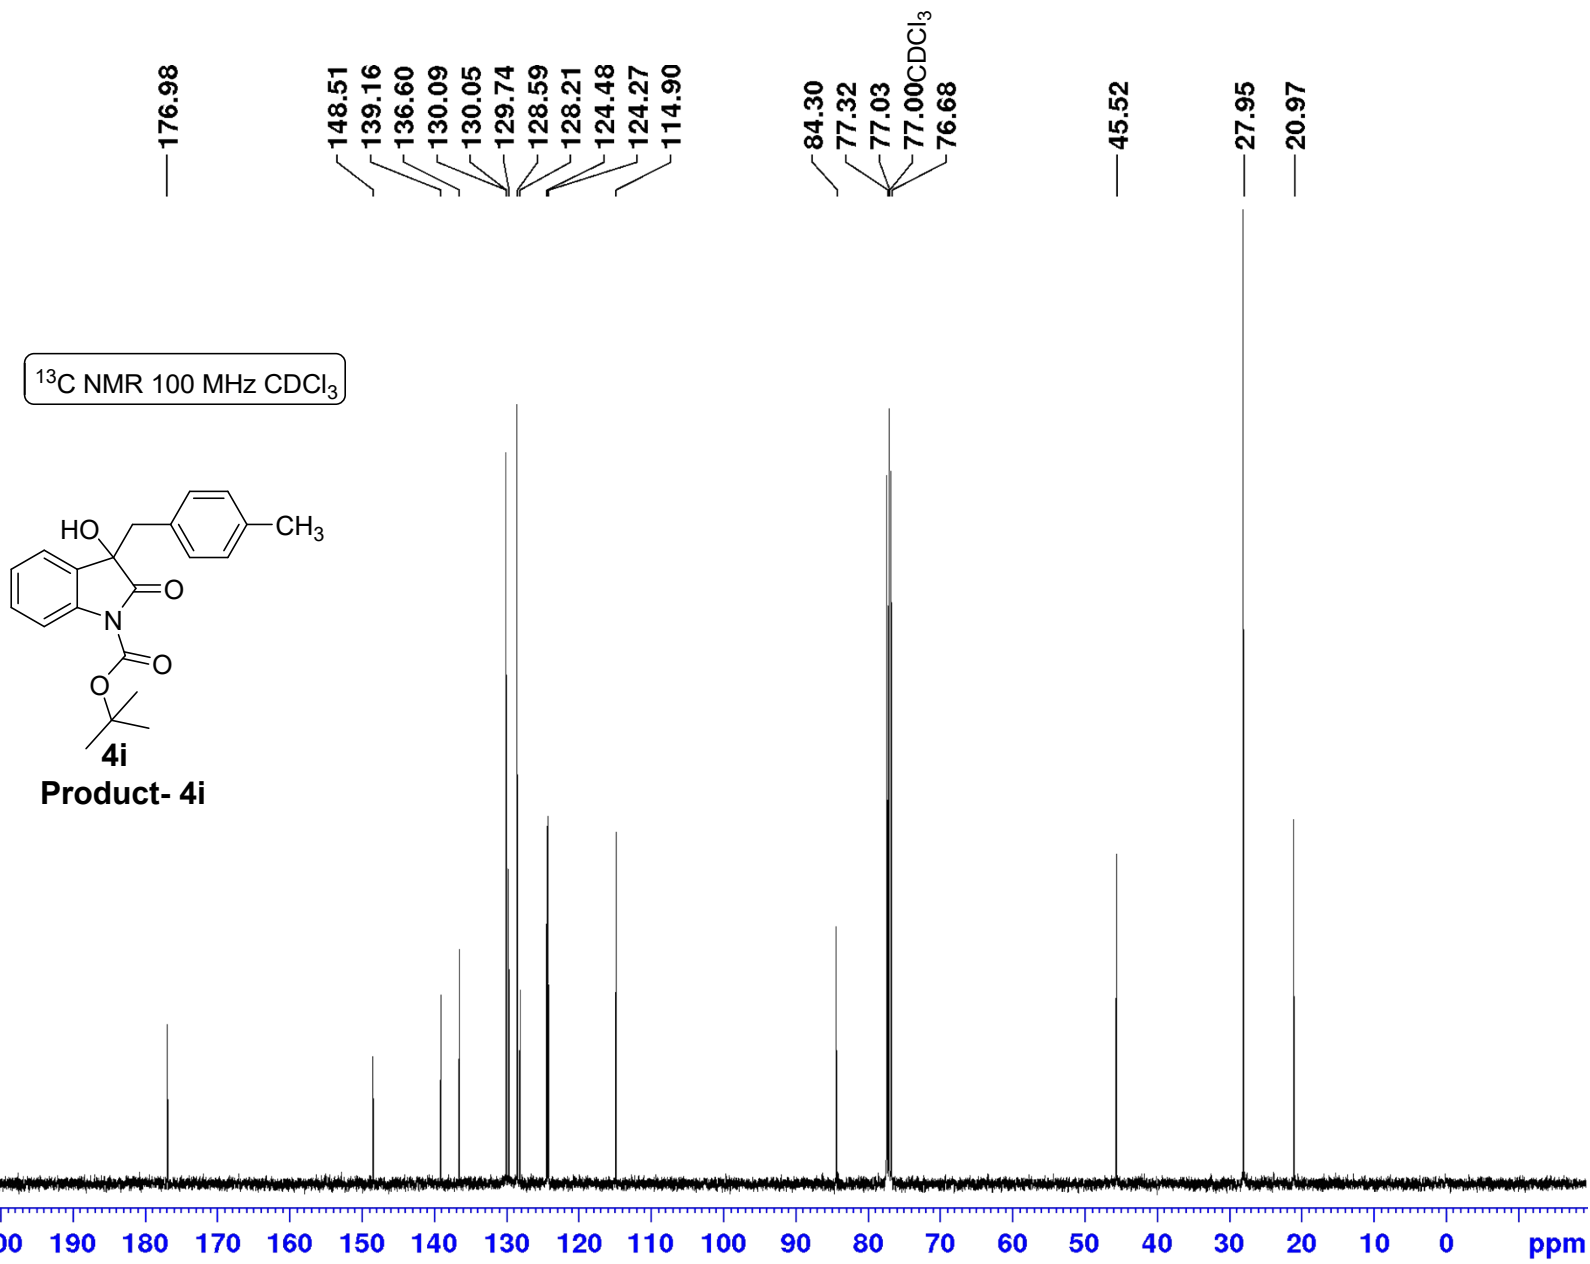

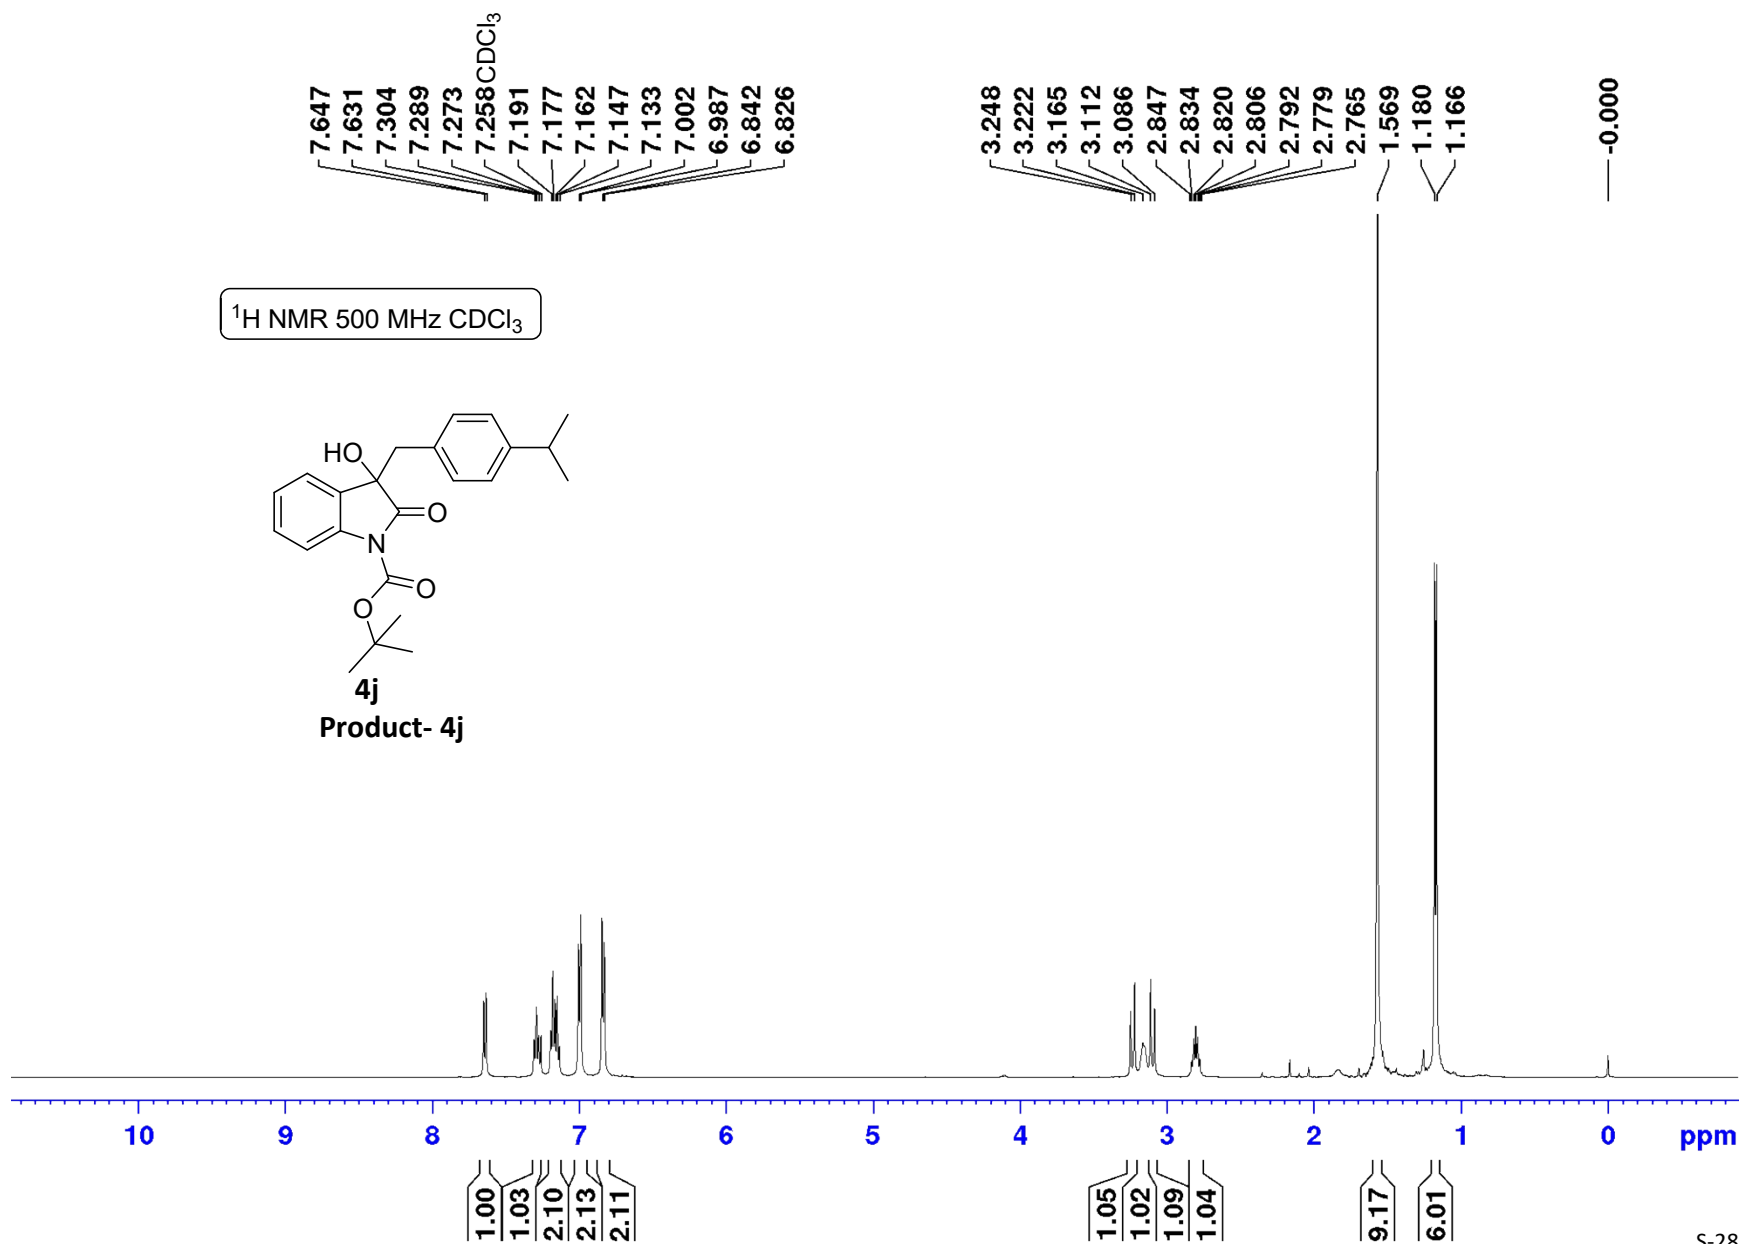

<sup>13</sup>C NMR 125 MHz CDCl<sub>3</sub>

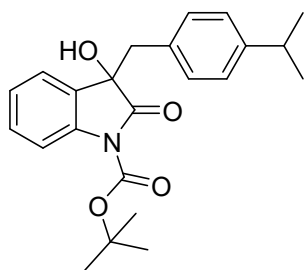

**4j**  
**Product-4j**

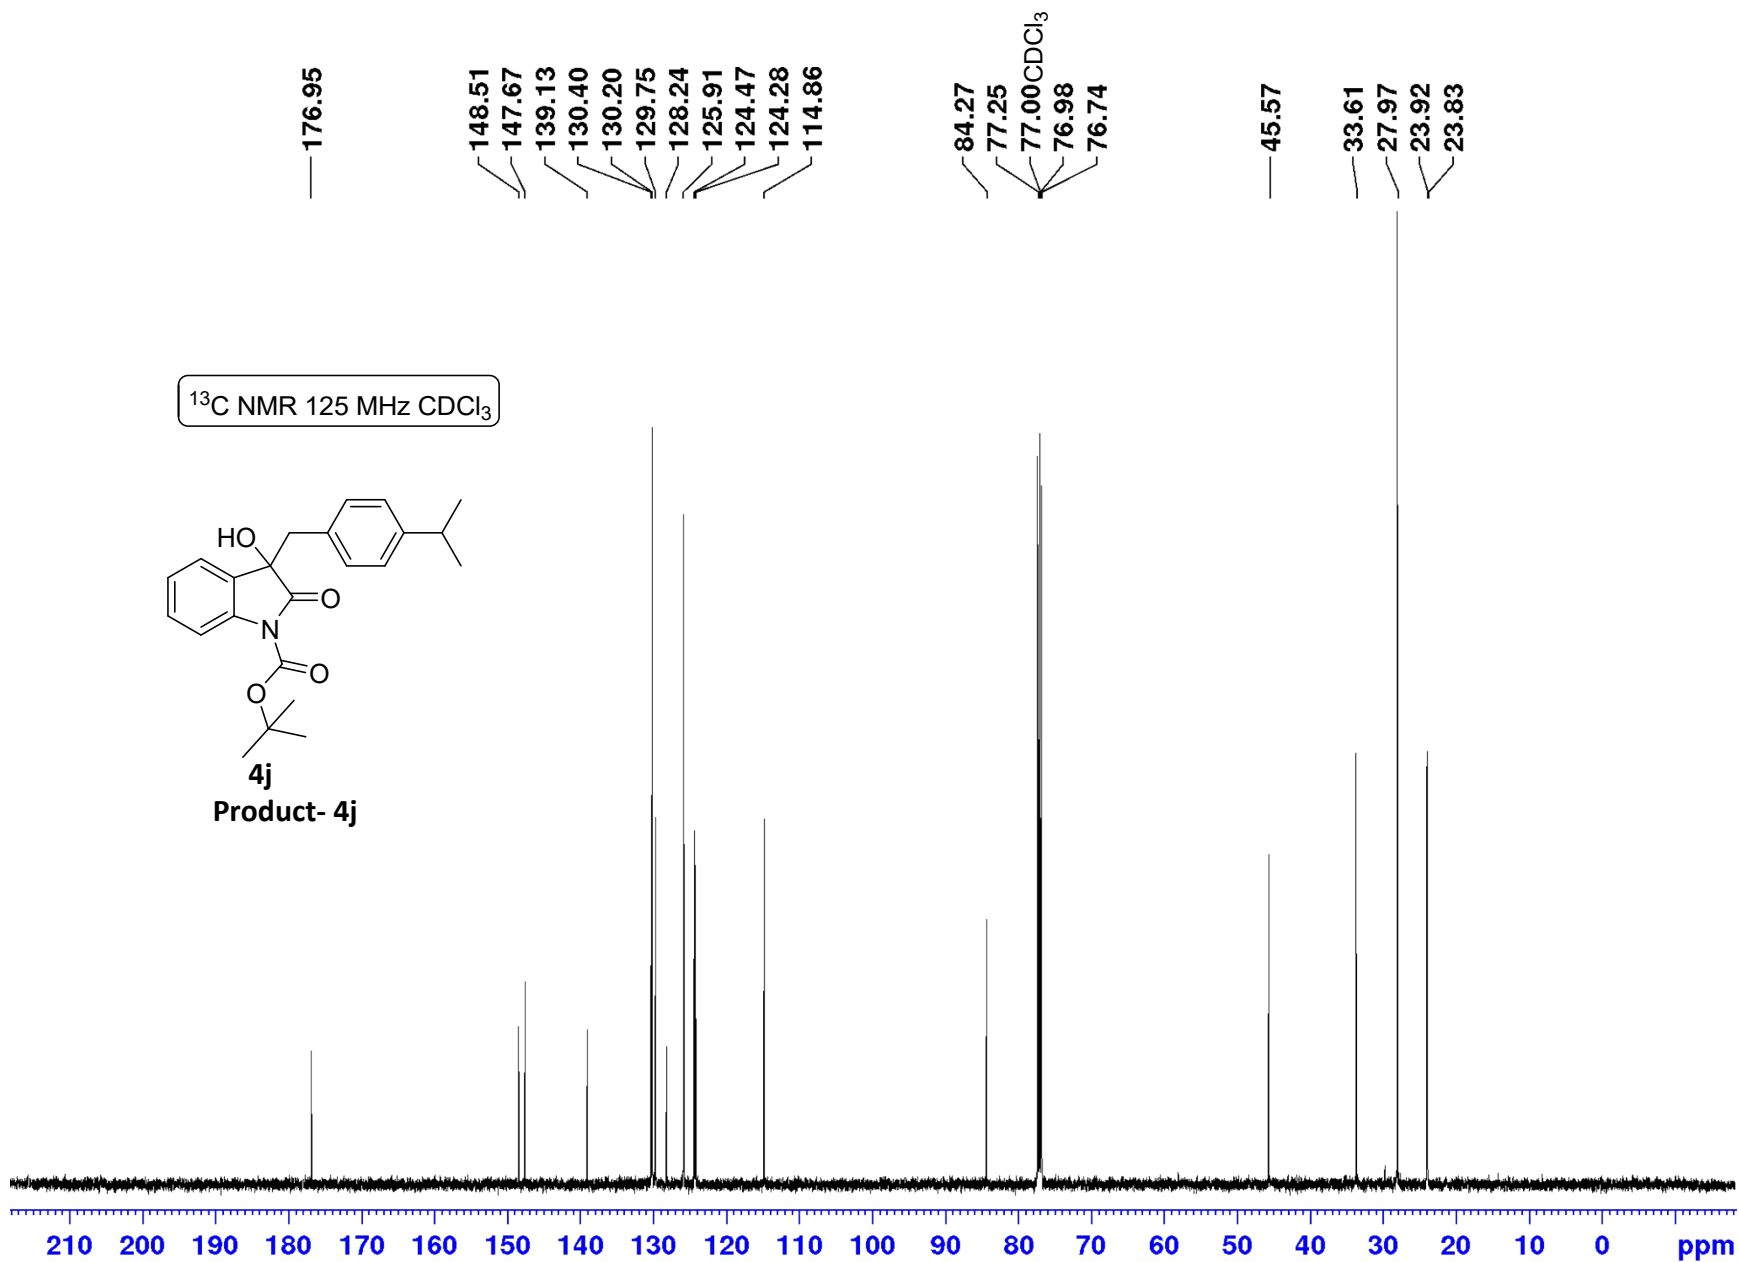

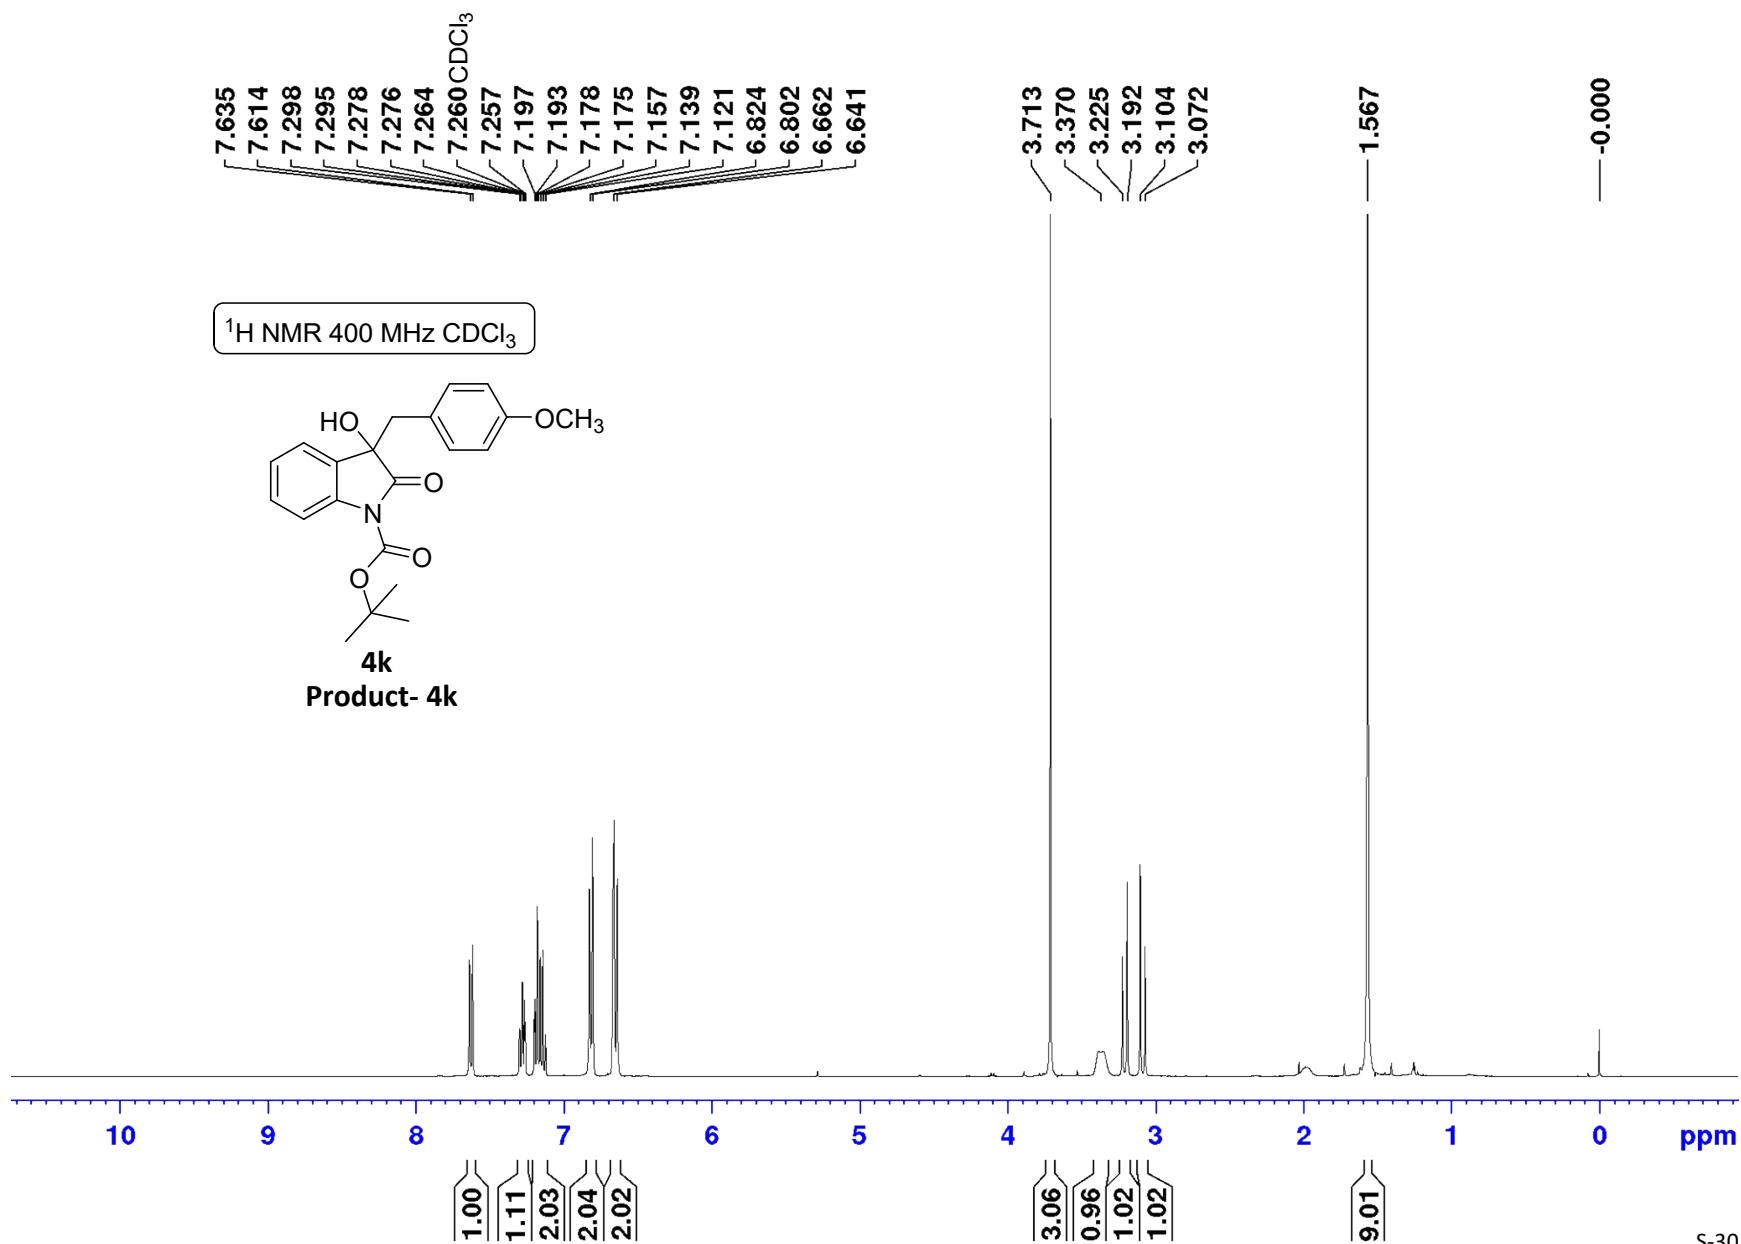

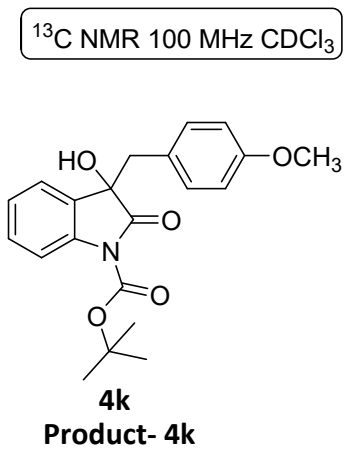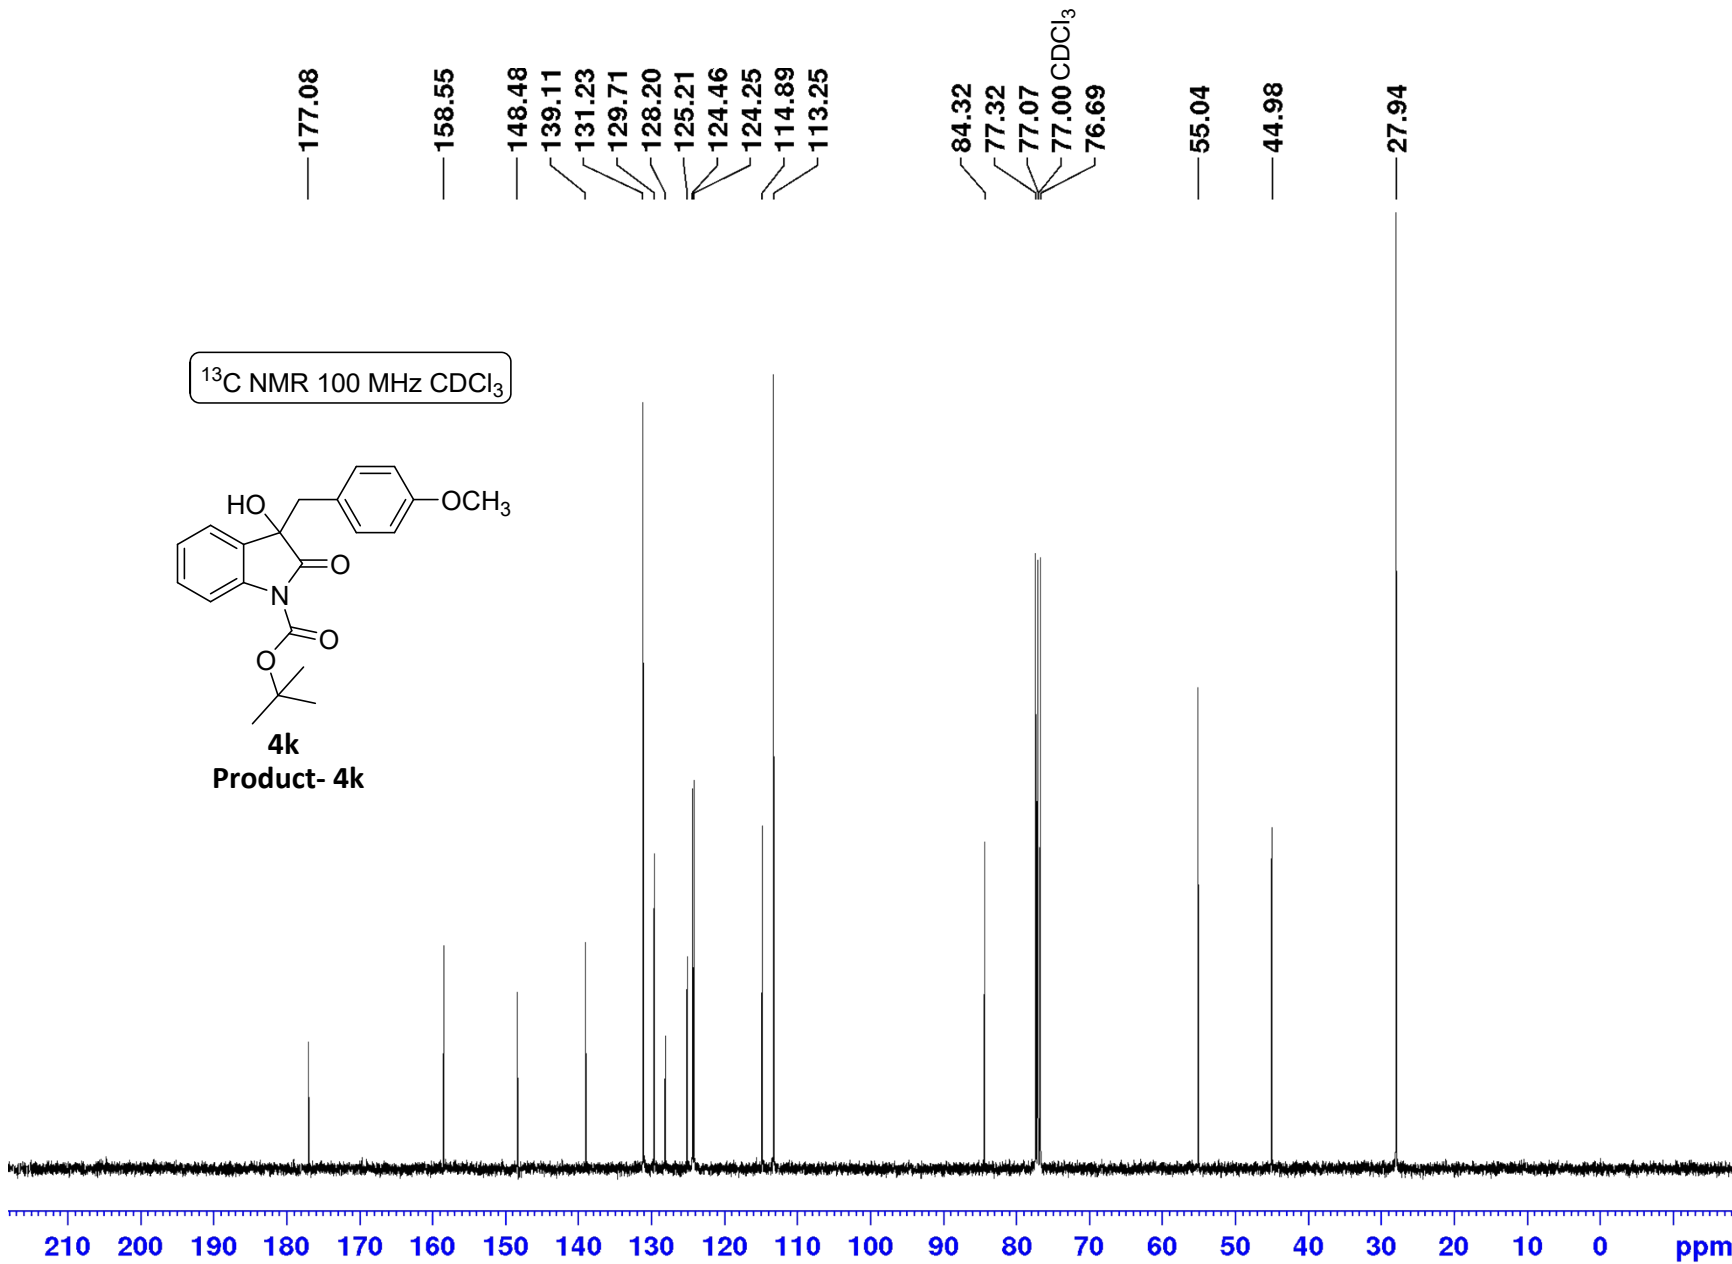

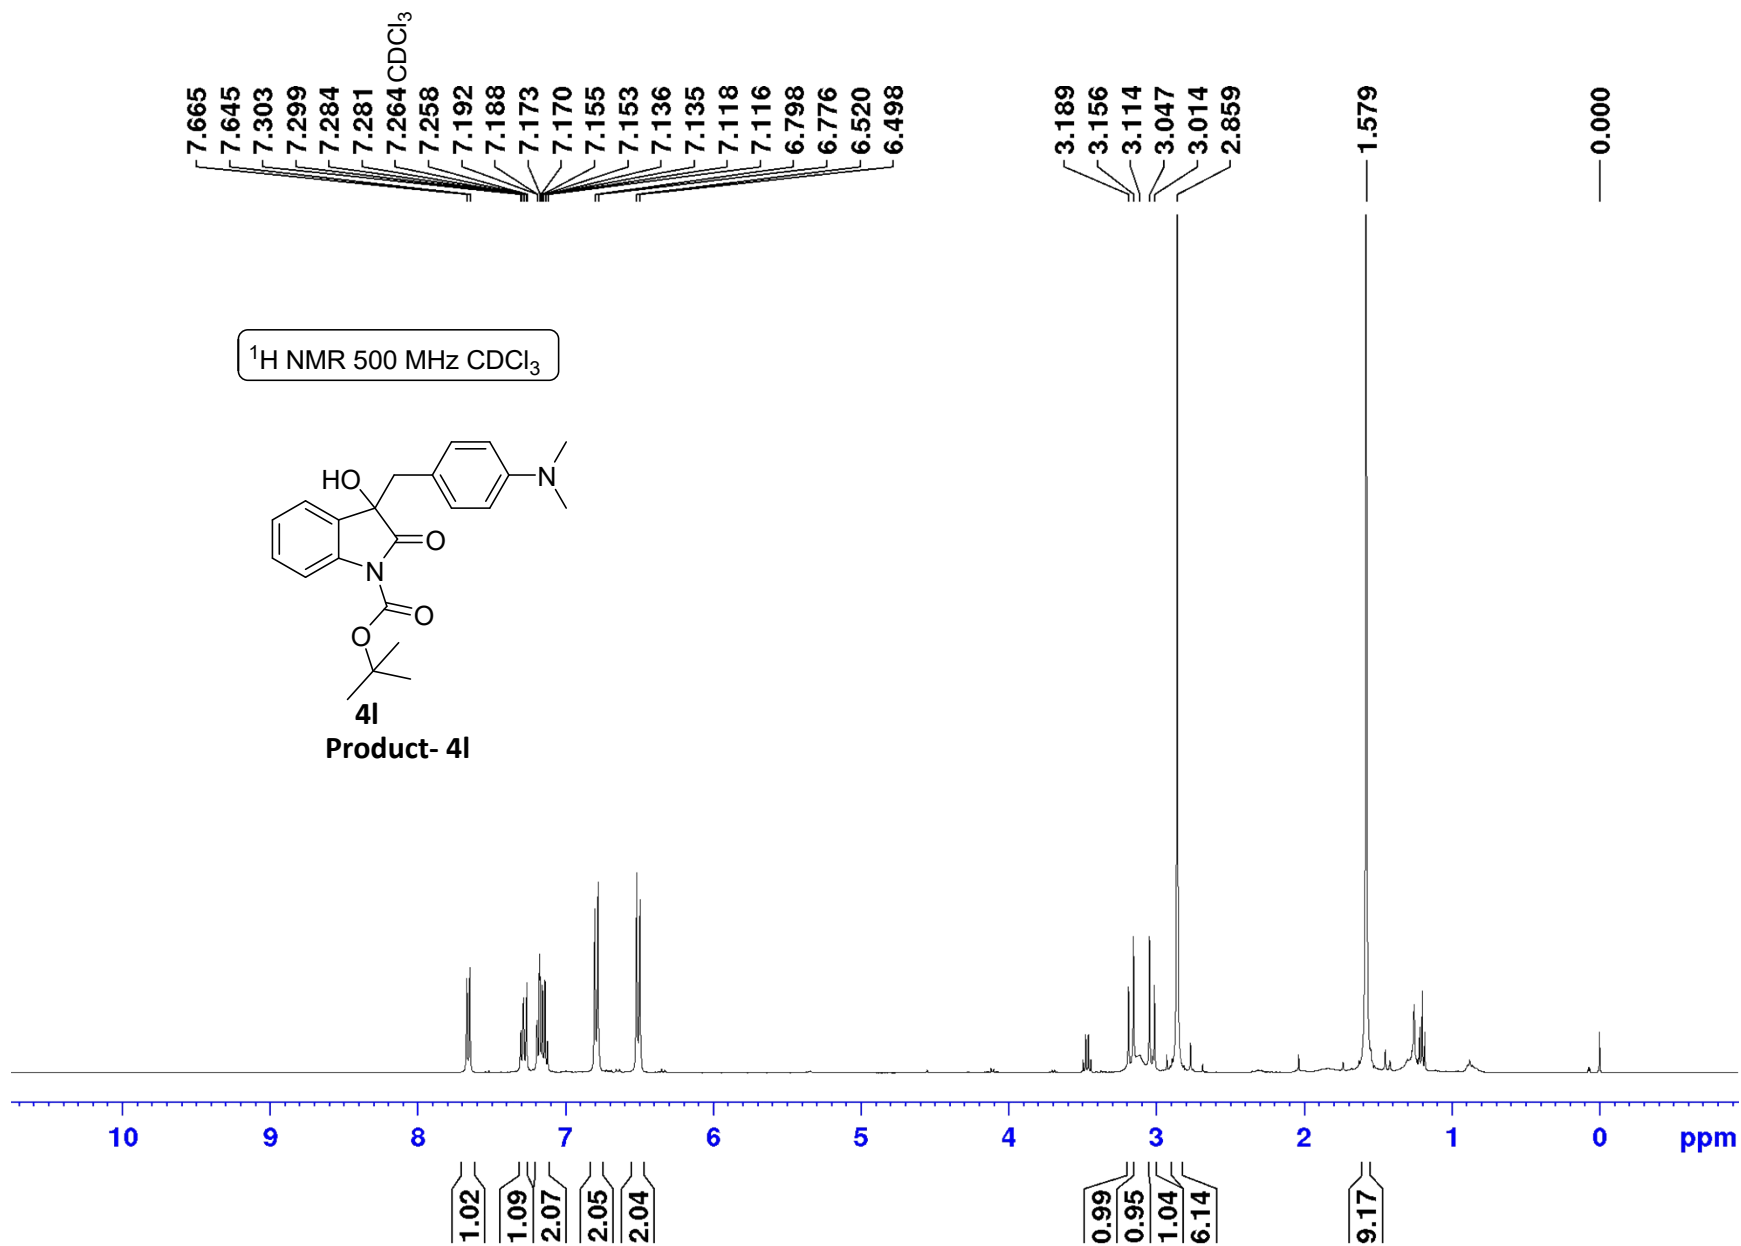



$^{13}\text{C}$  NMR 125 MHz  $\text{CDCl}_3$

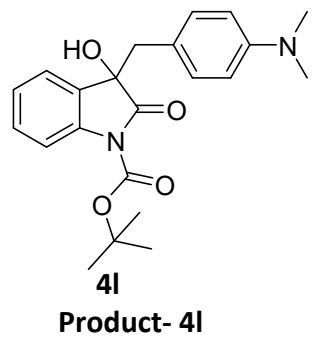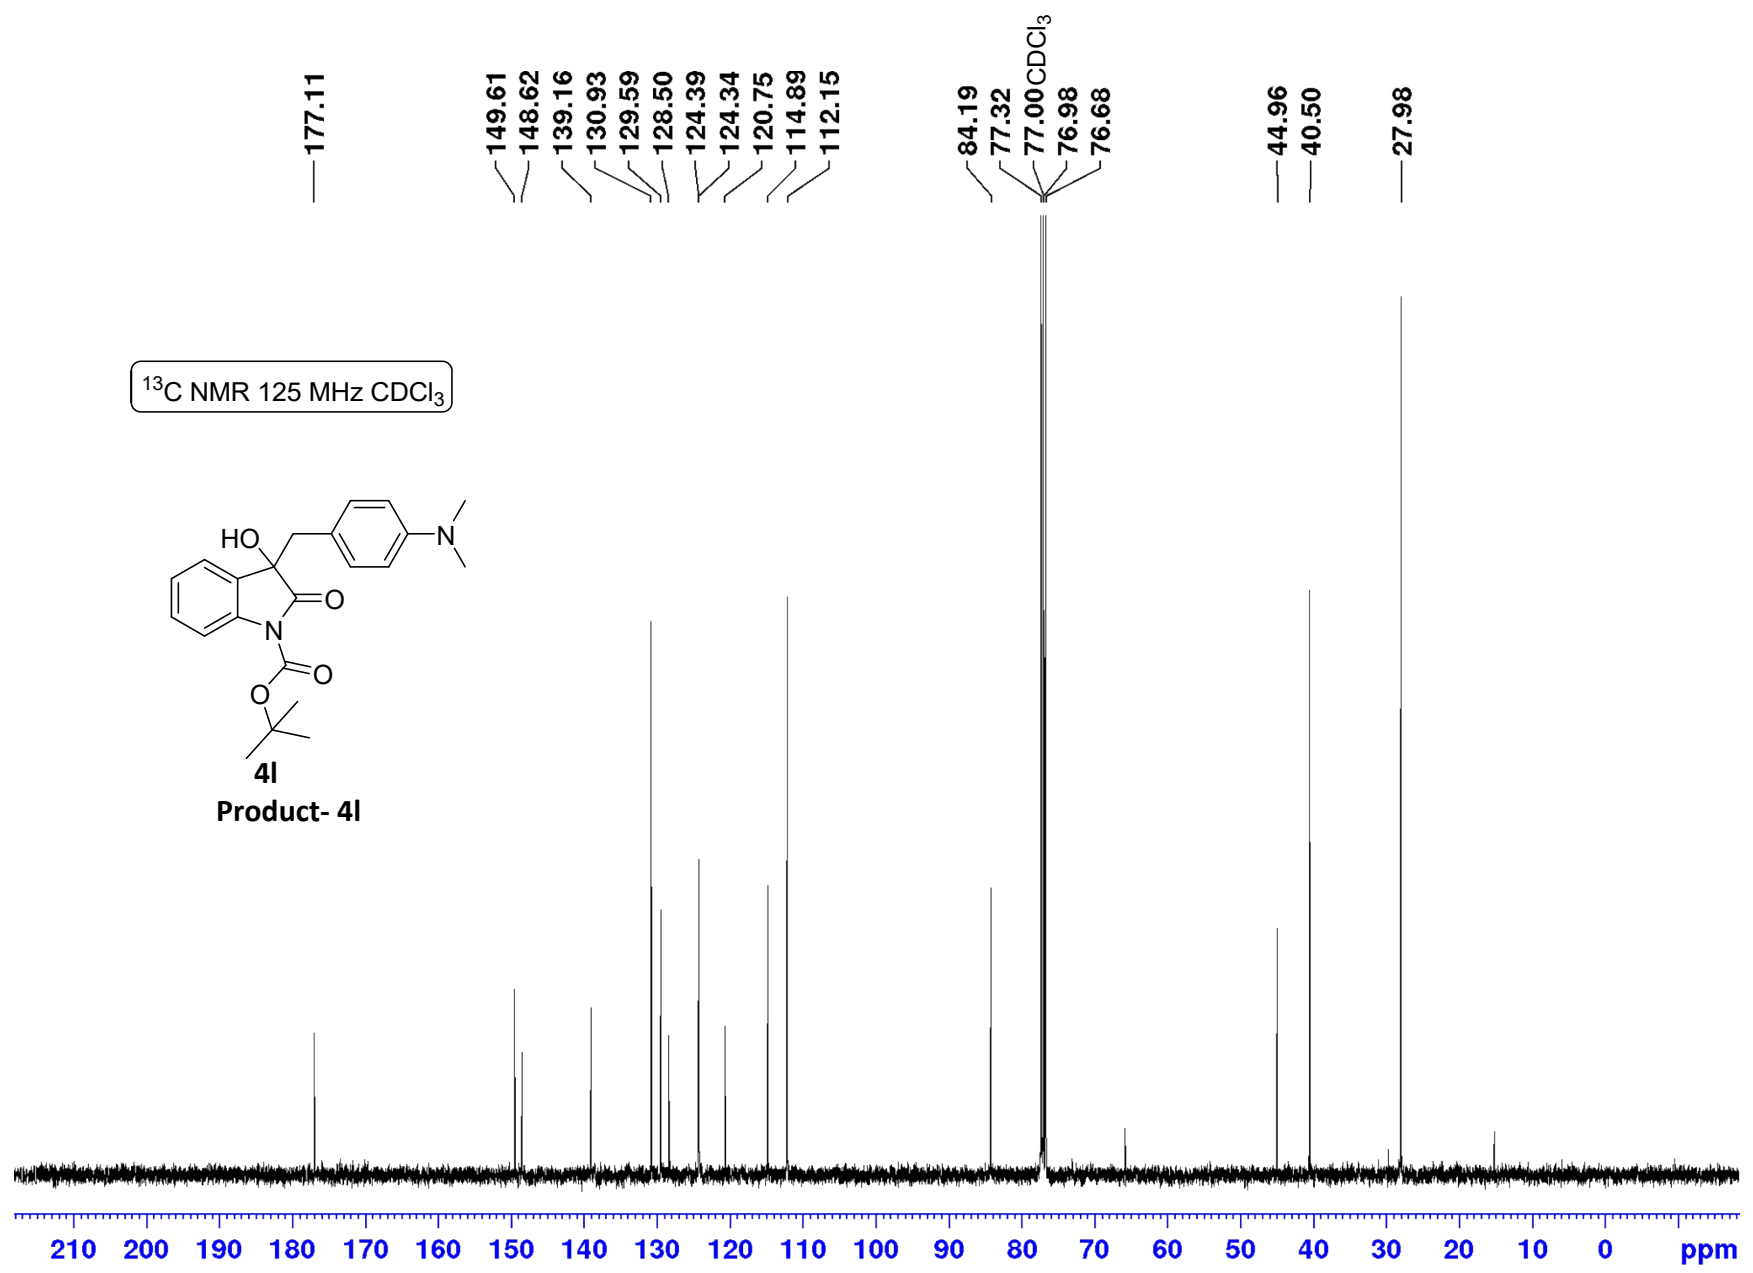

7.642  
7.622  
7.413  
7.392  
7.345  
7.339  
7.329  
7.323  
7.318  
7.308  
7.302  
7.282 CDCl<sub>3</sub>  
7.218  
7.213  
7.199  
7.196  
7.182  
7.180  
7.163  
7.161  
7.048  
7.028

3.404  
3.357  
3.325  
3.227  
3.195

<sup>1</sup>H NMR 400 MHz CDCl<sub>3</sub>

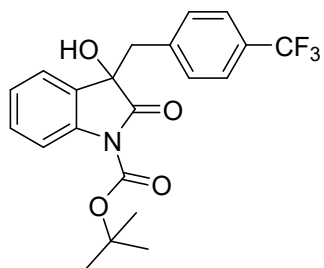

4m

Product- 4m

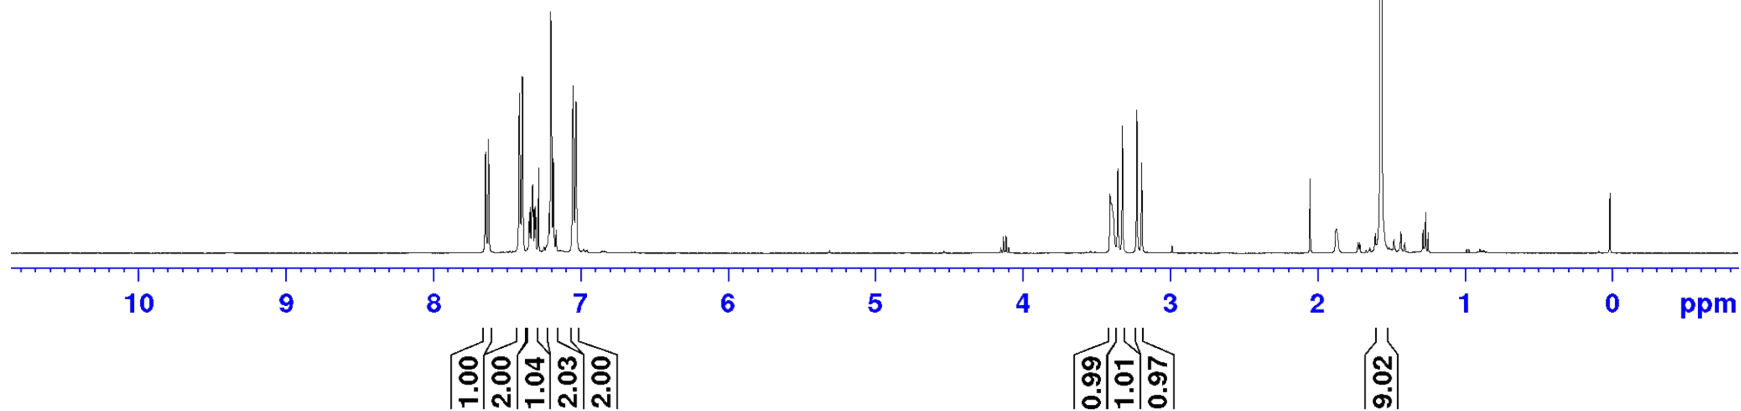

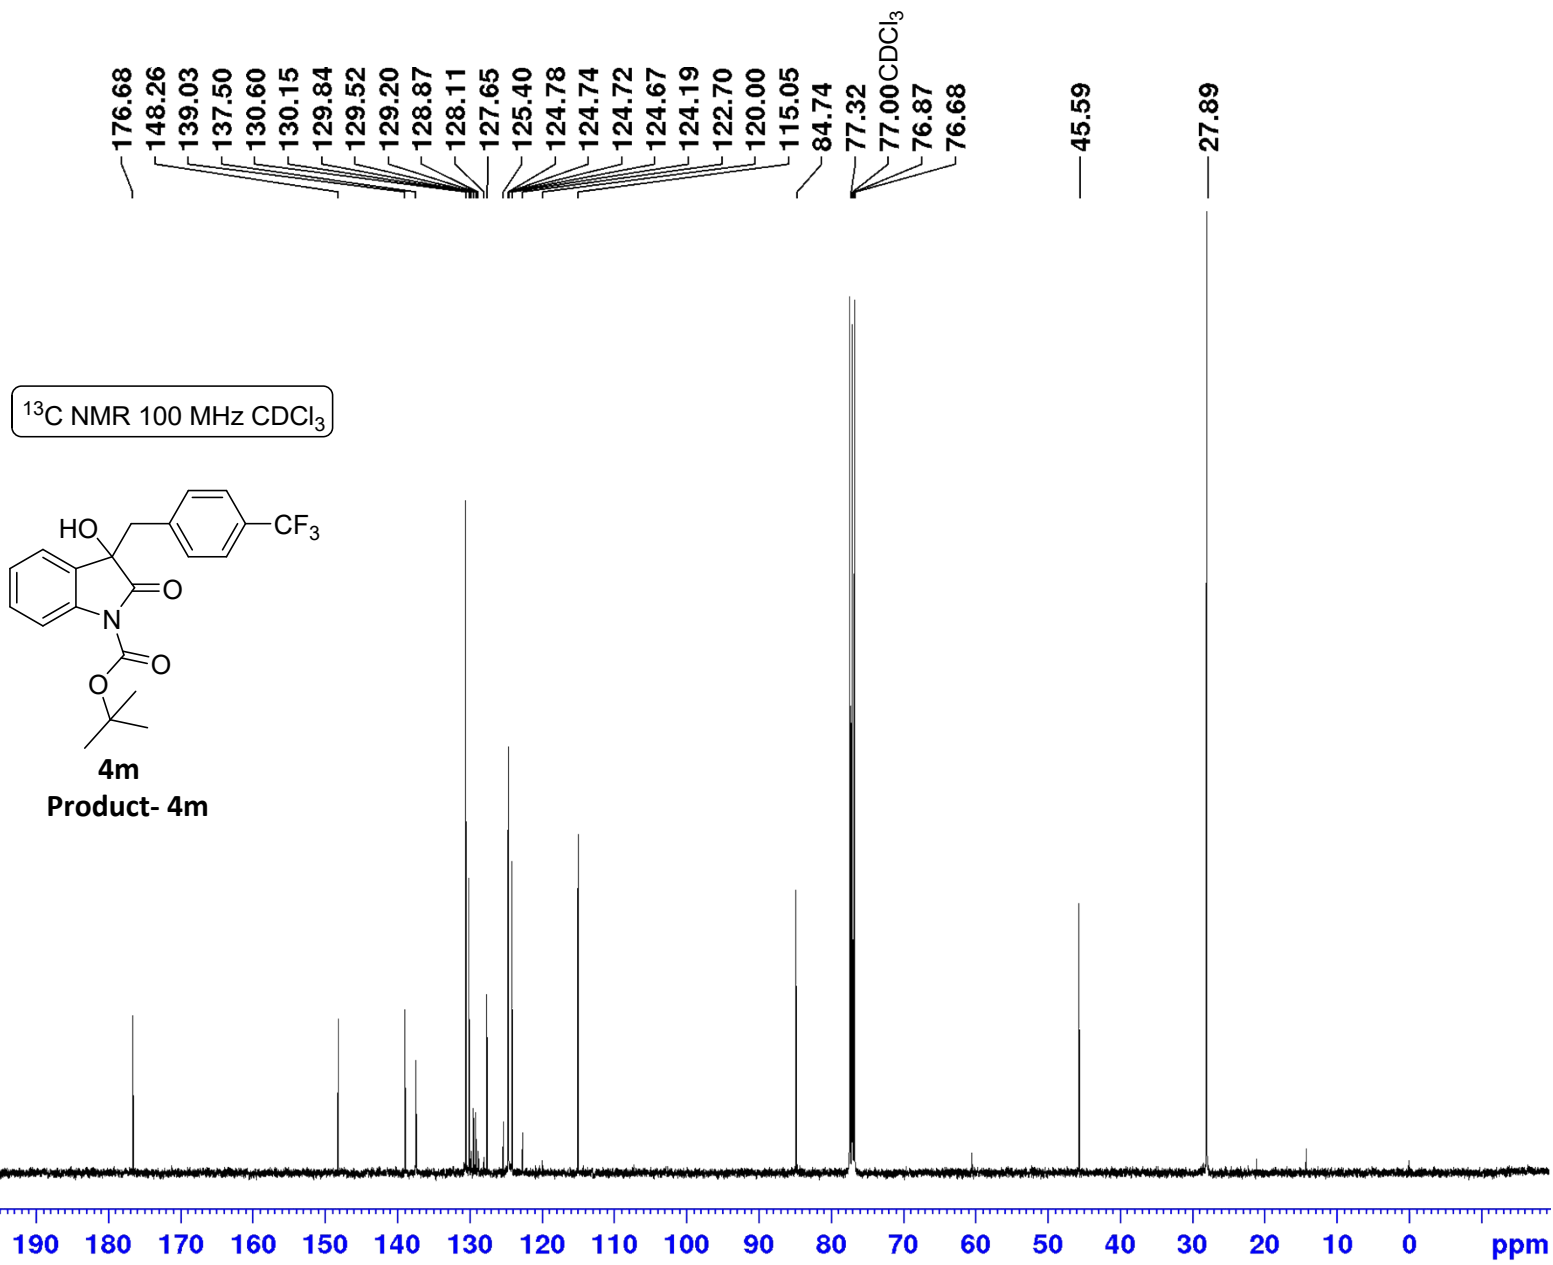

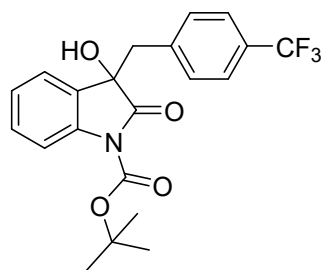

**4m**  
**Product- 4m**

—-72.25

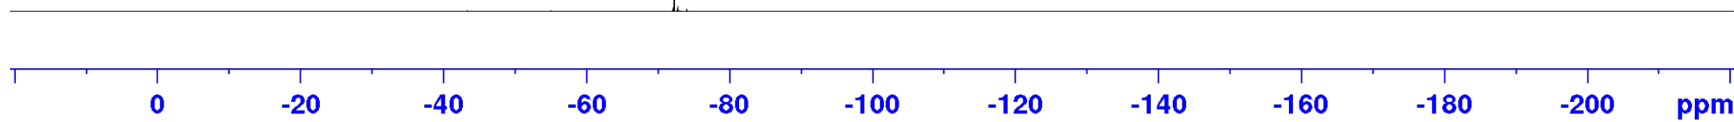

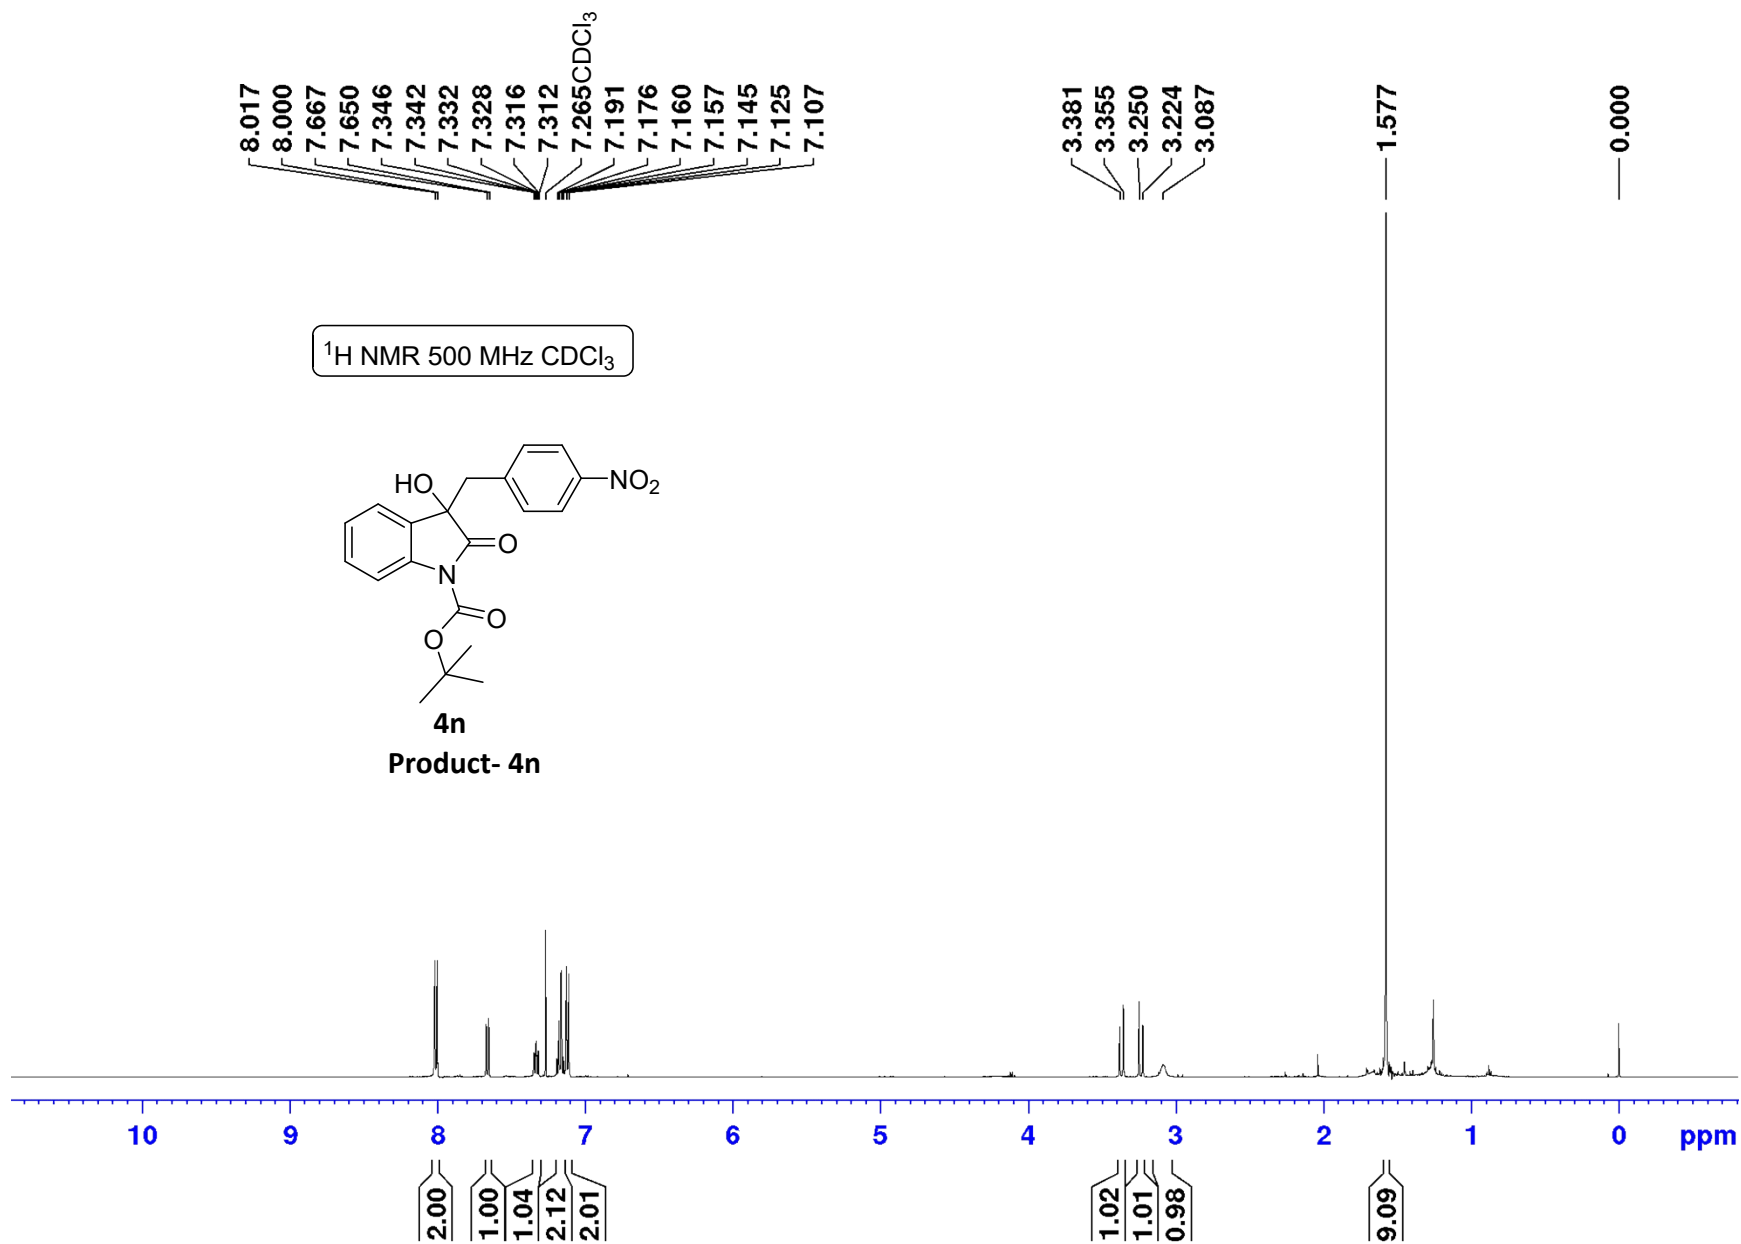

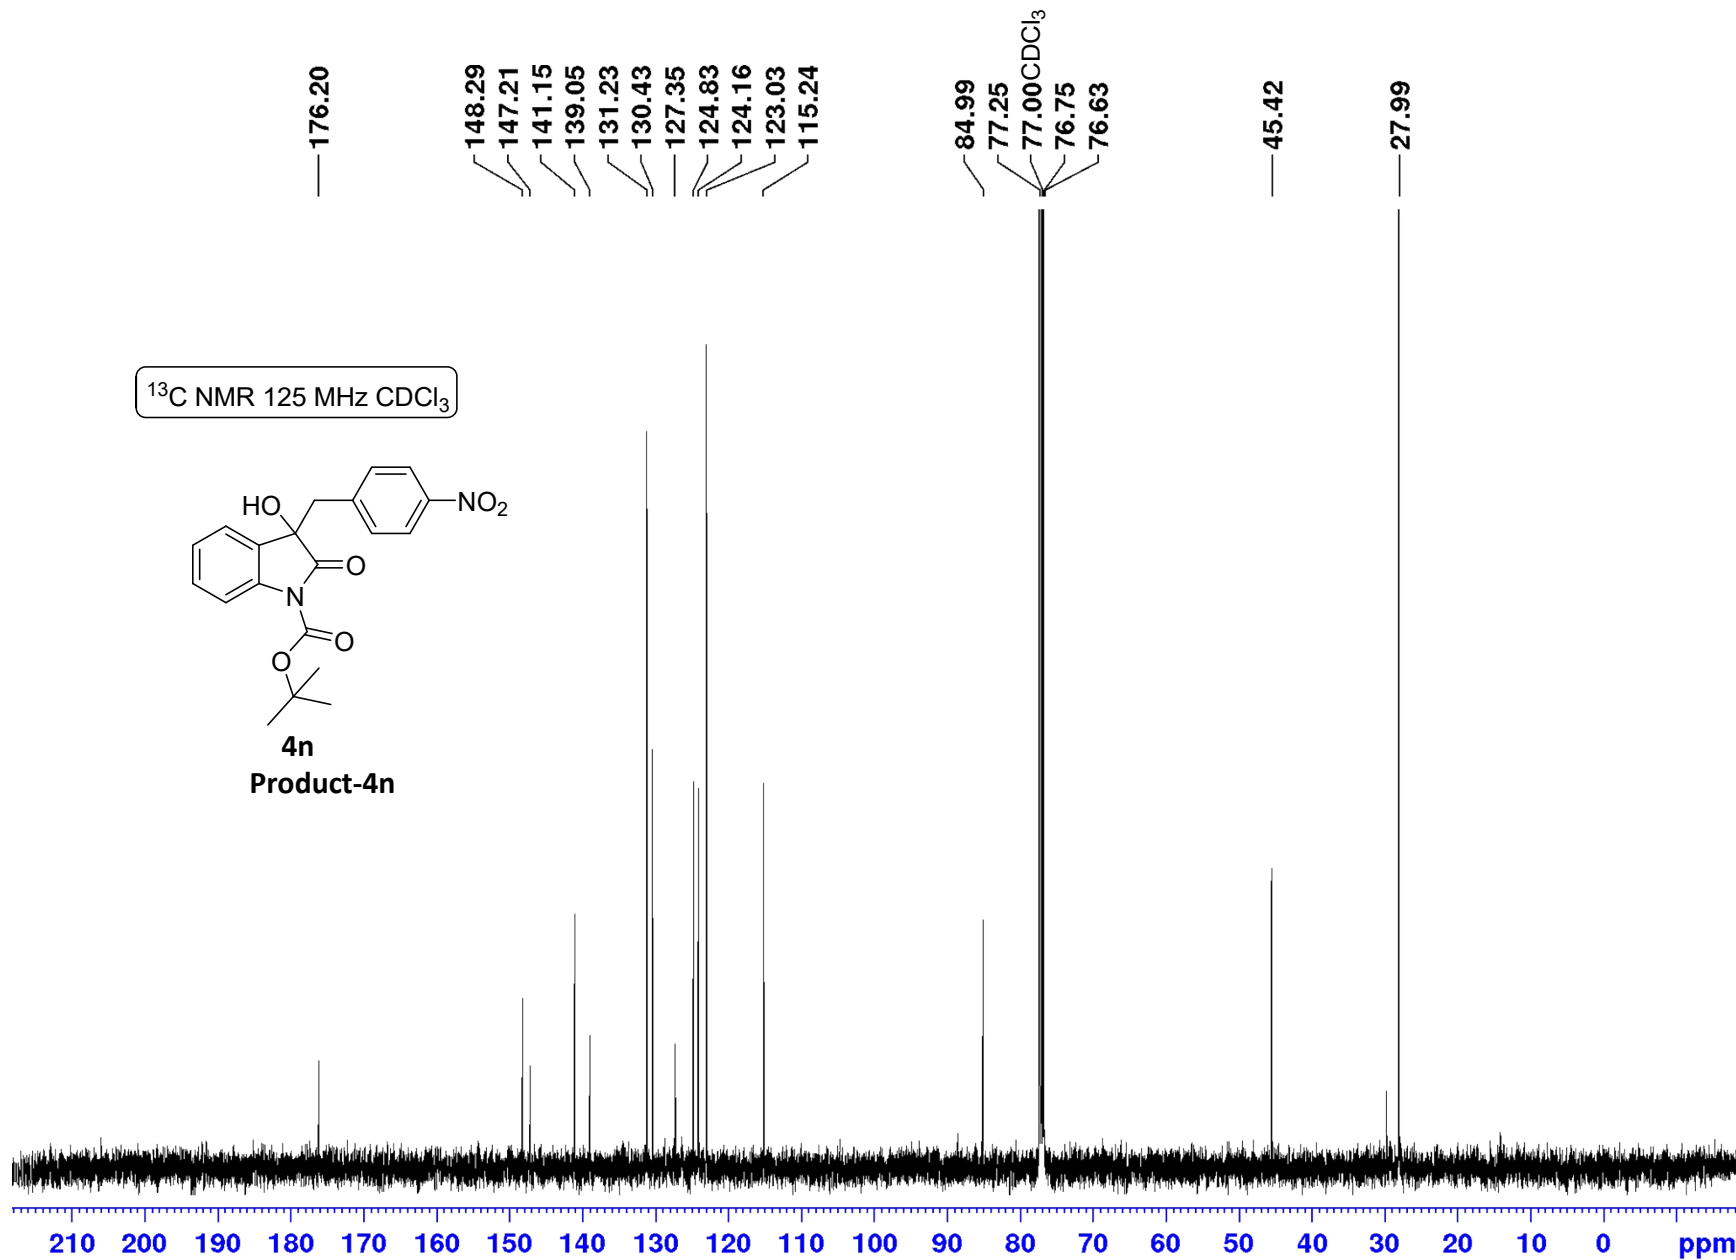

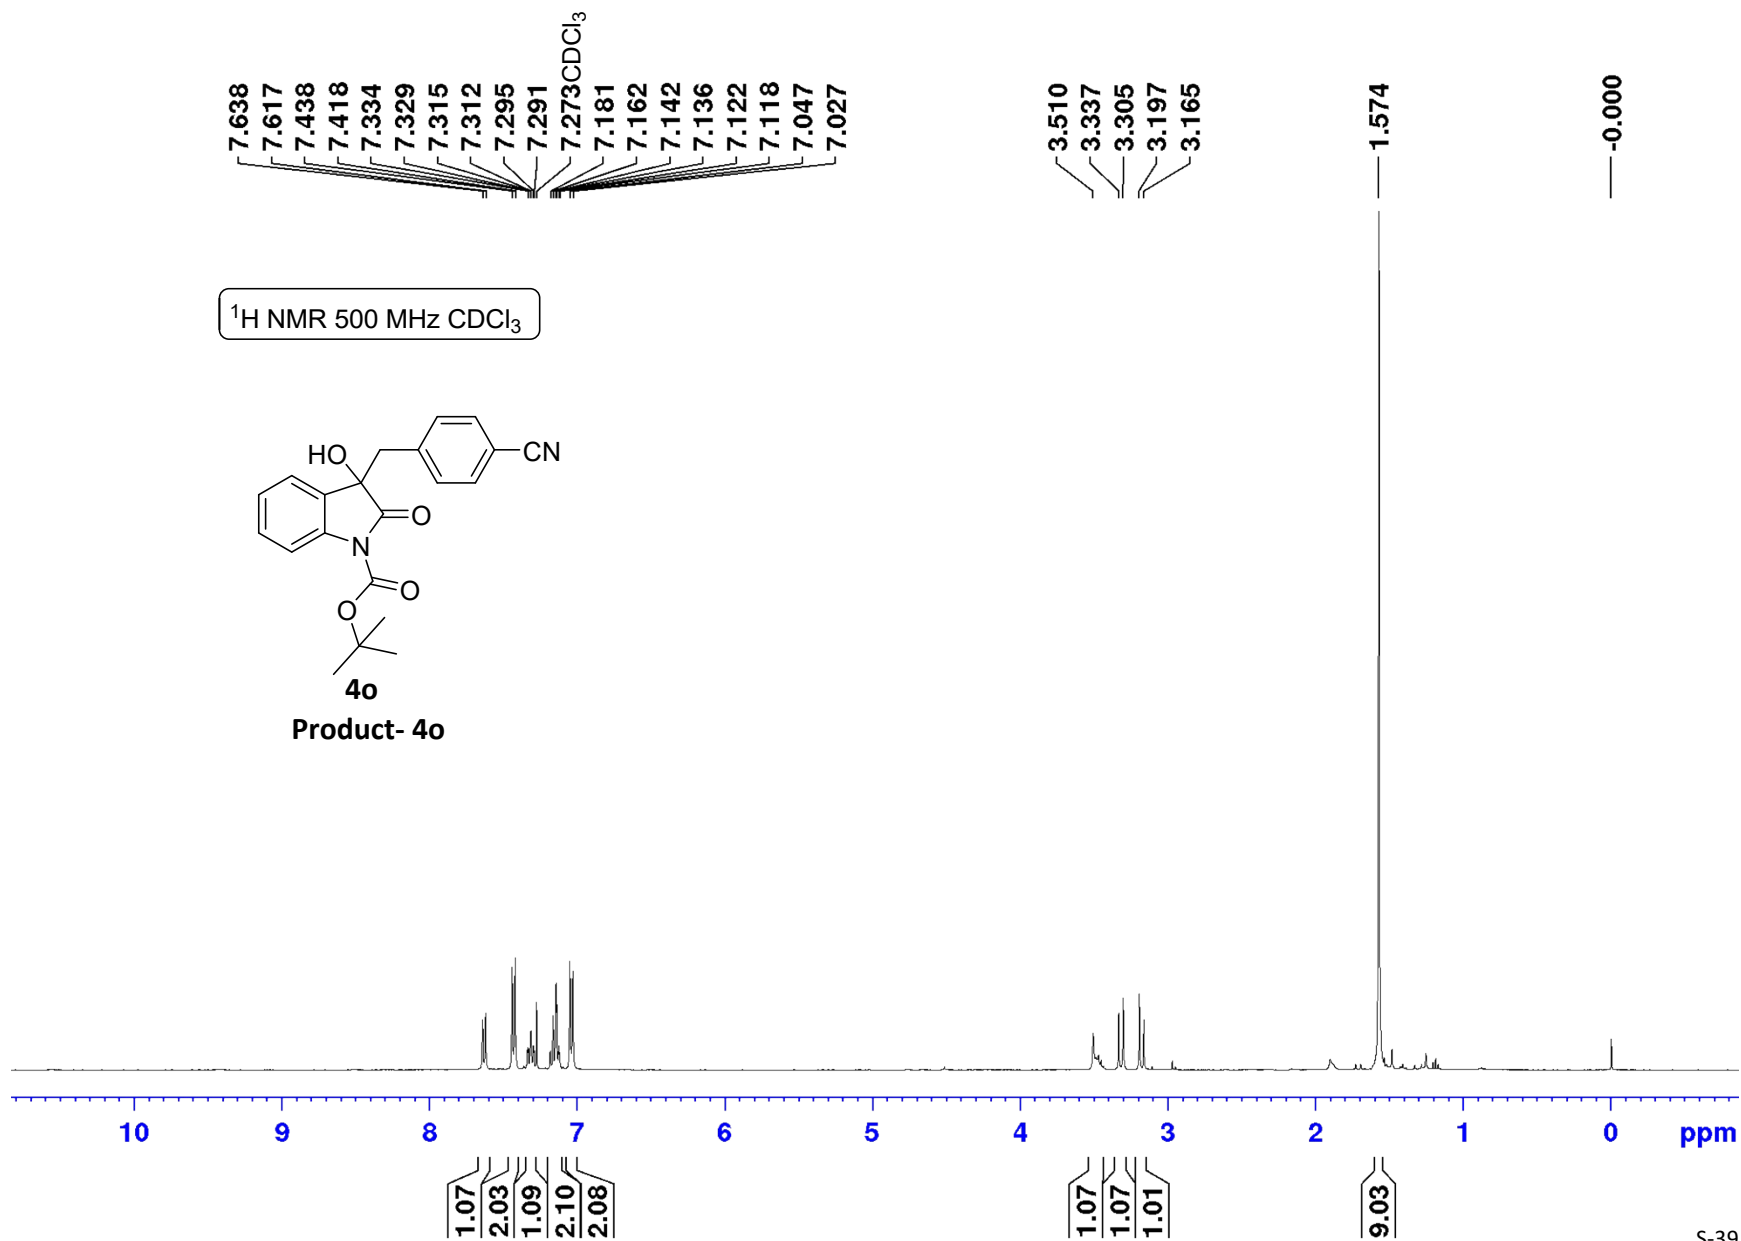

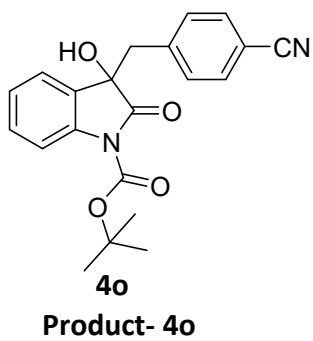

$^{13}\text{C}$  NMR 125 MHz  $\text{CDCl}_3$

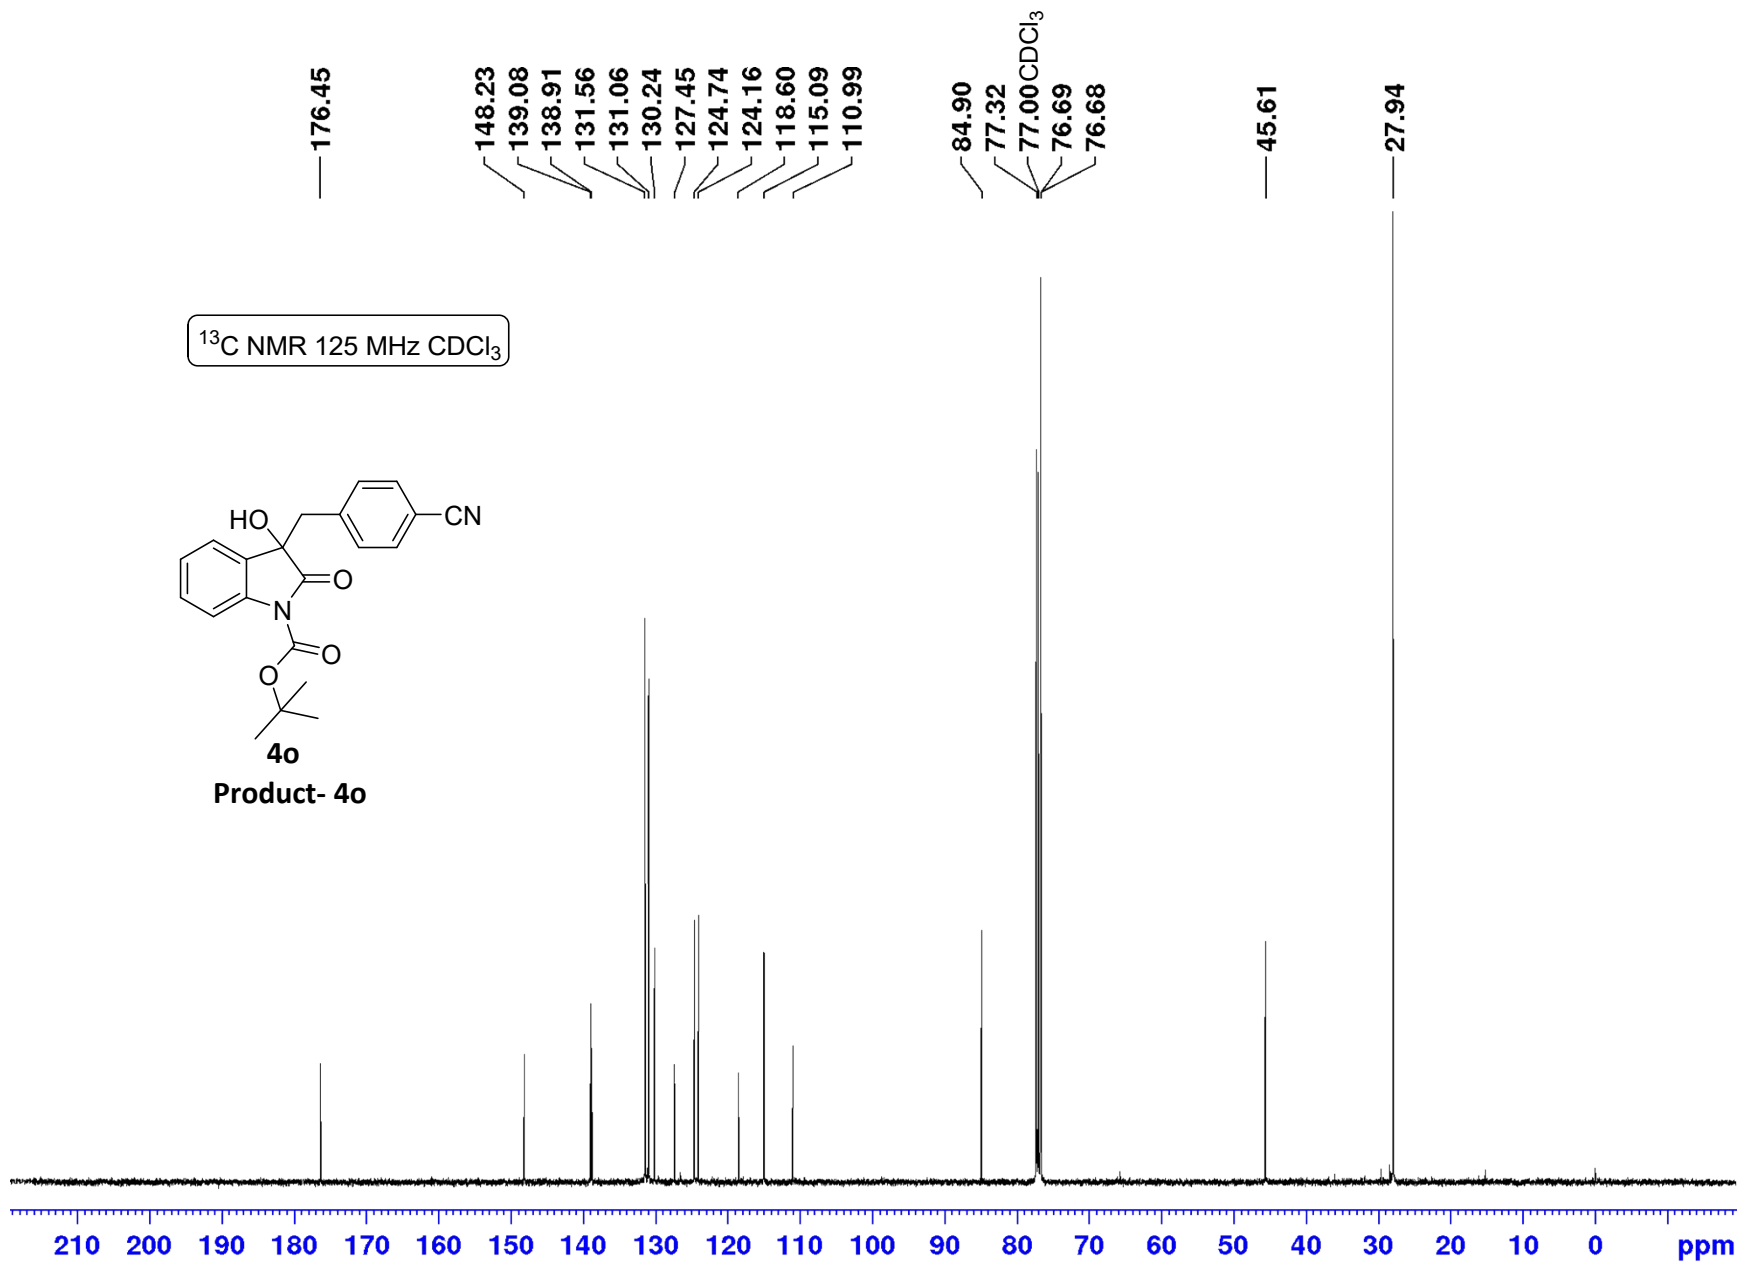



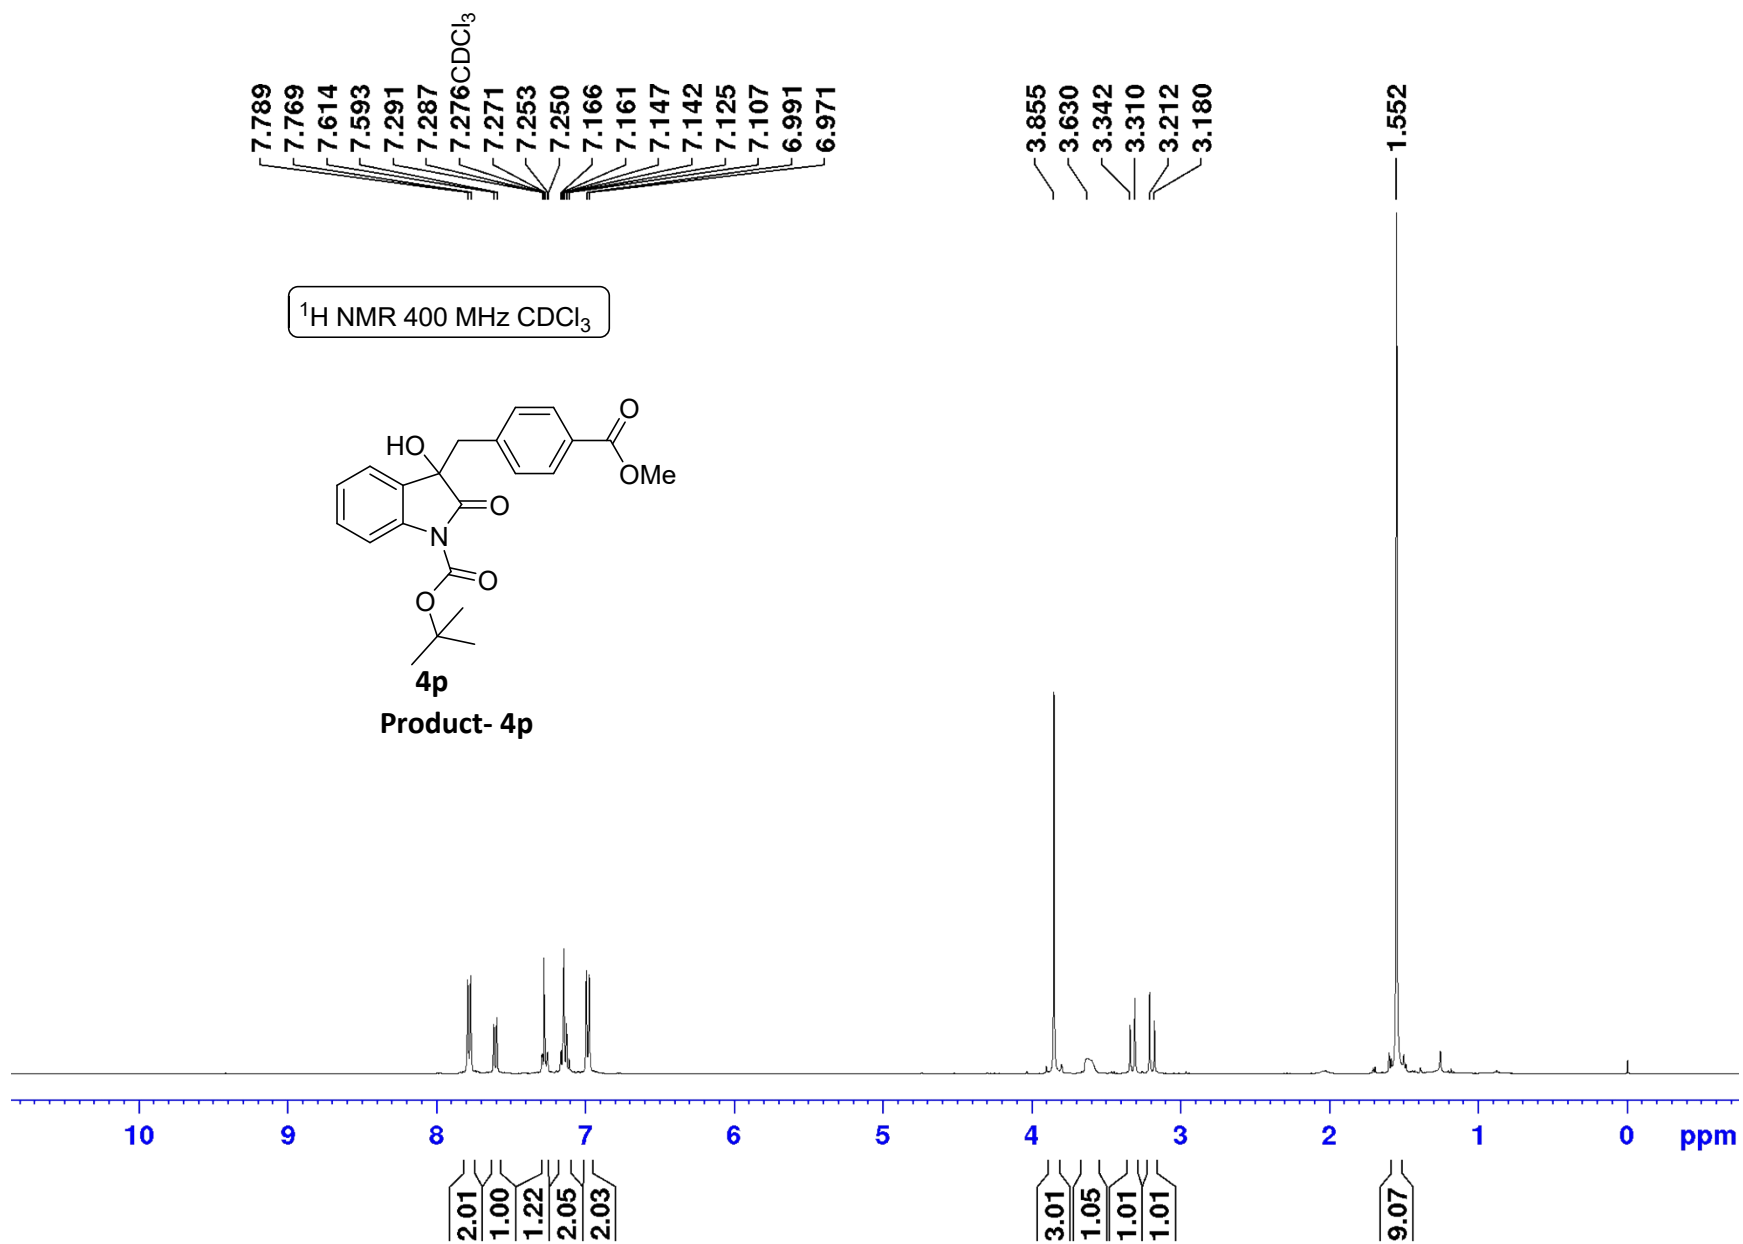

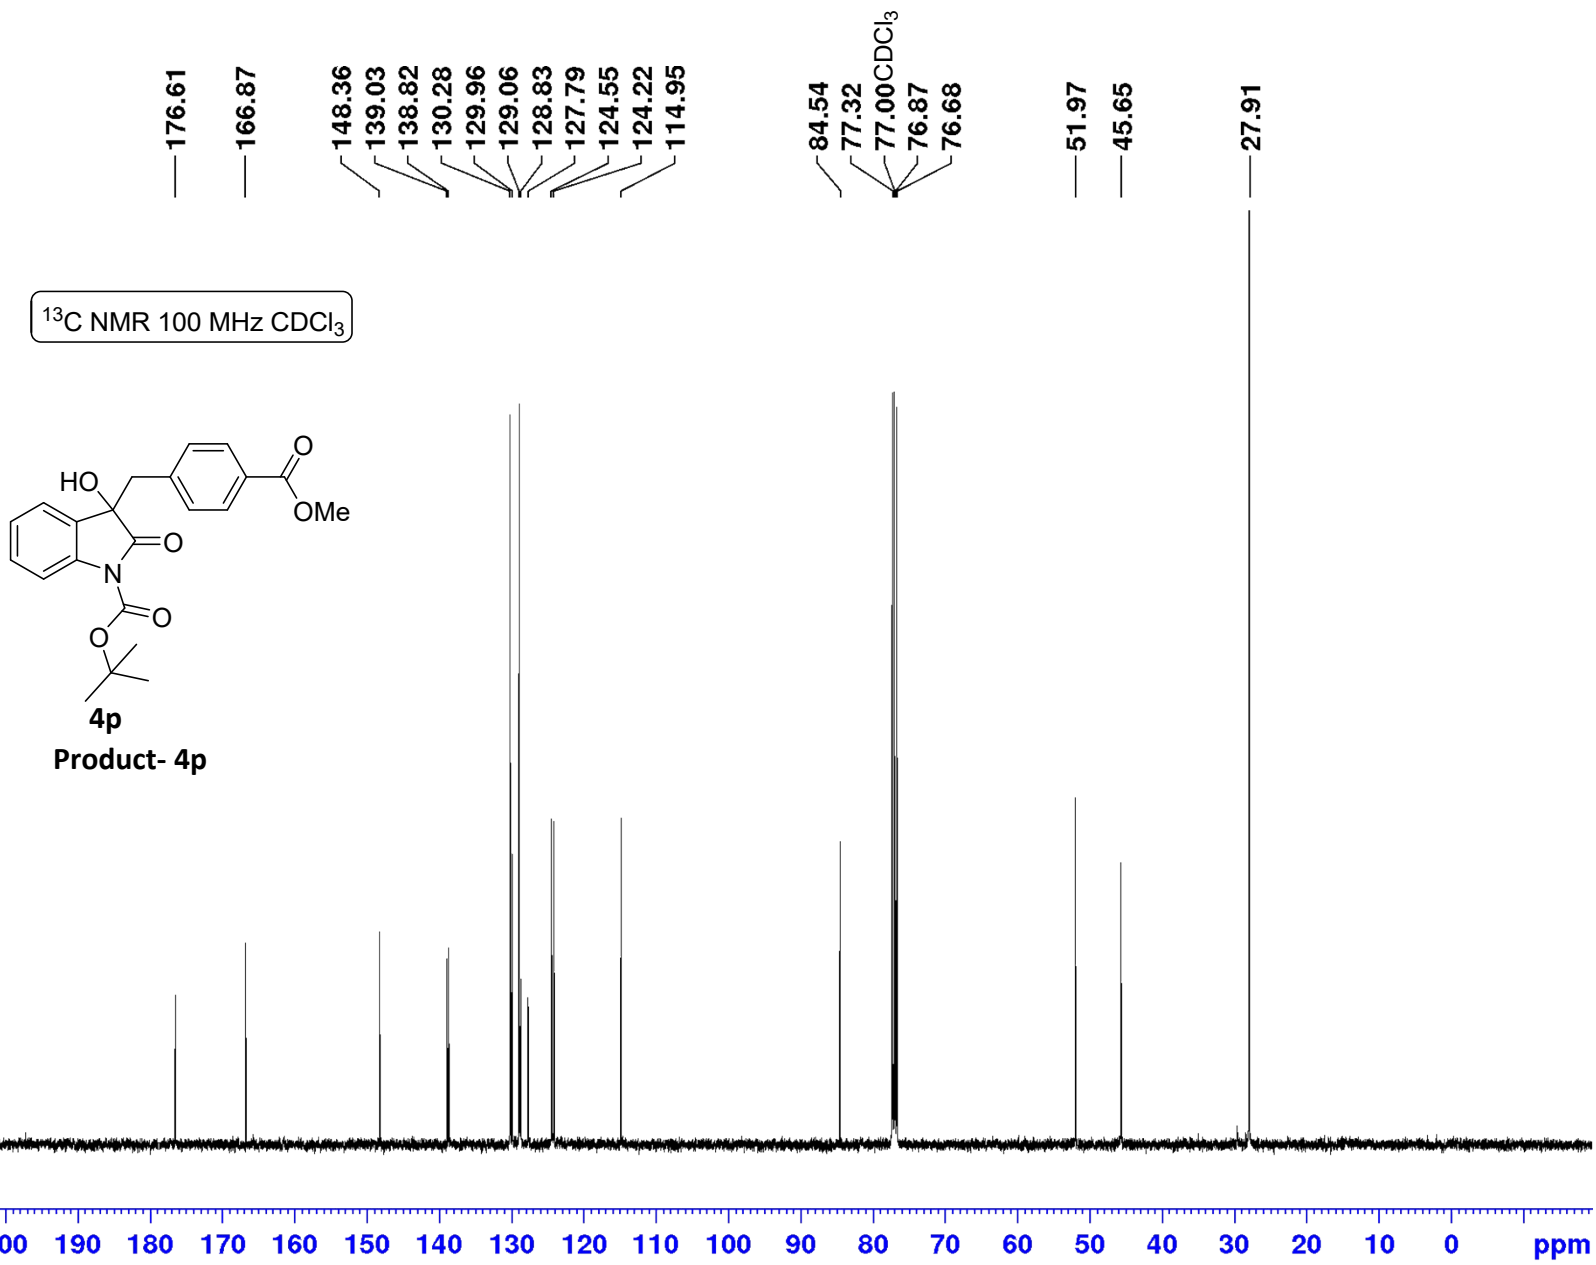

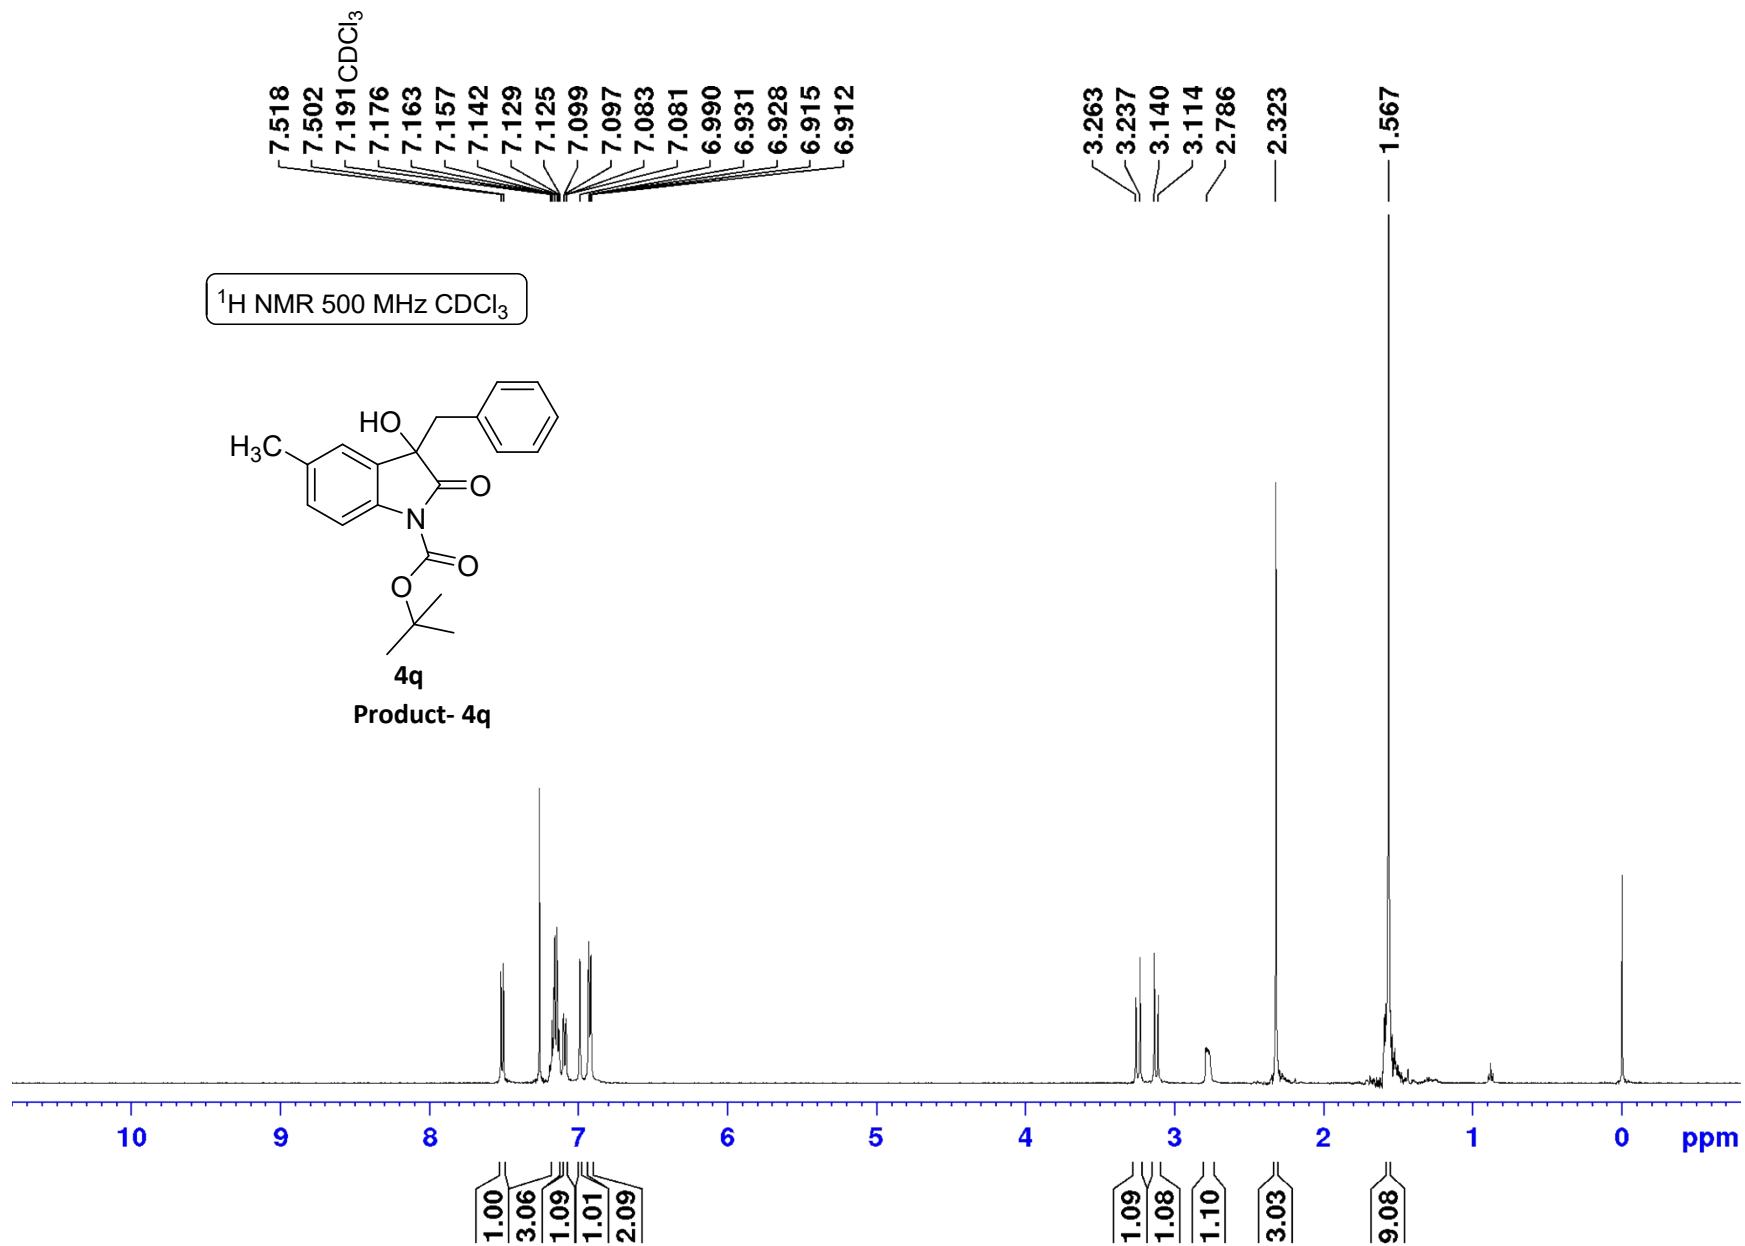

<sup>13</sup>C NMR 125 MHz CDCl<sub>3</sub>

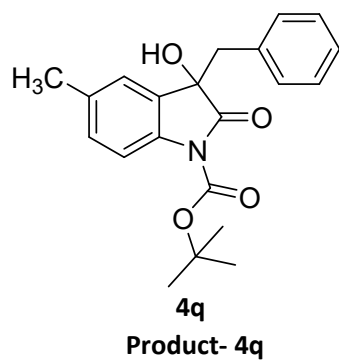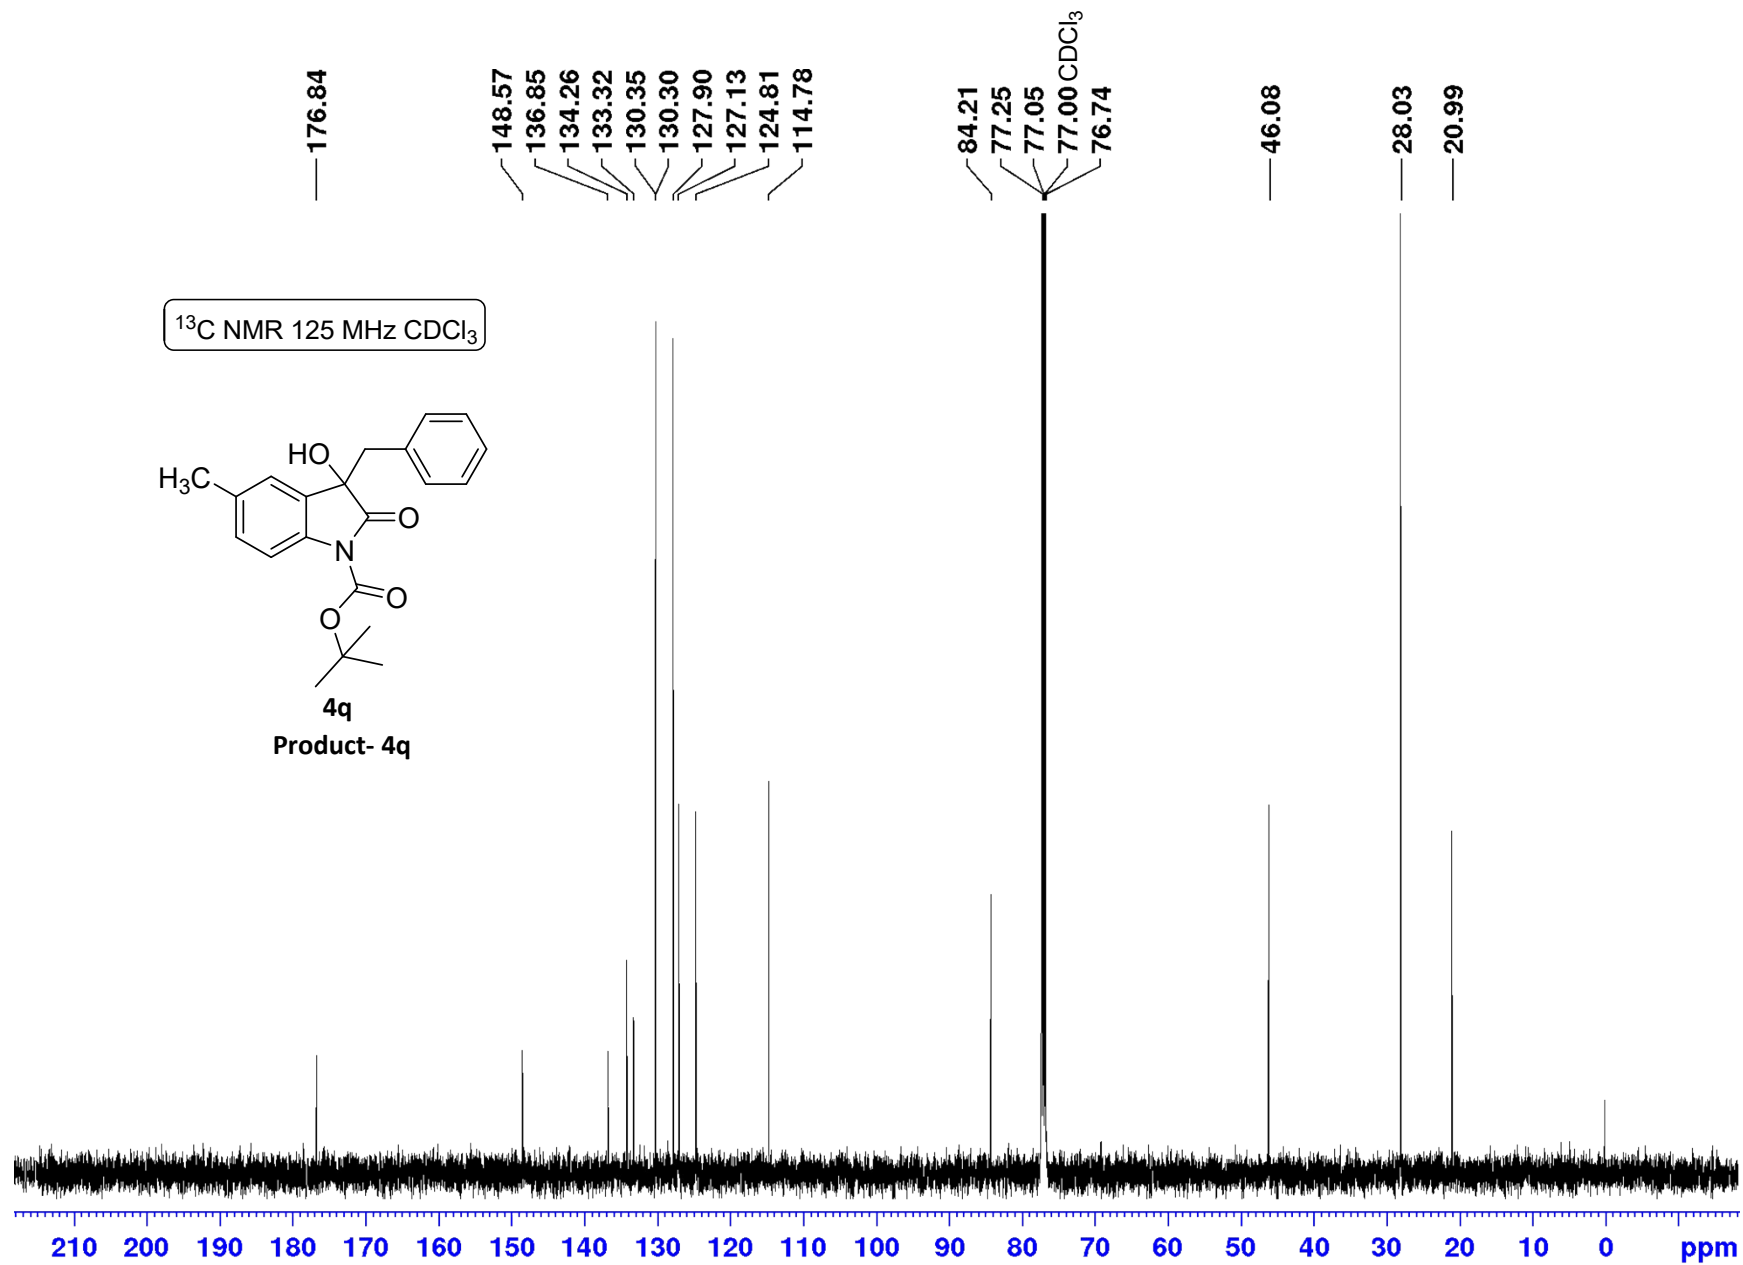

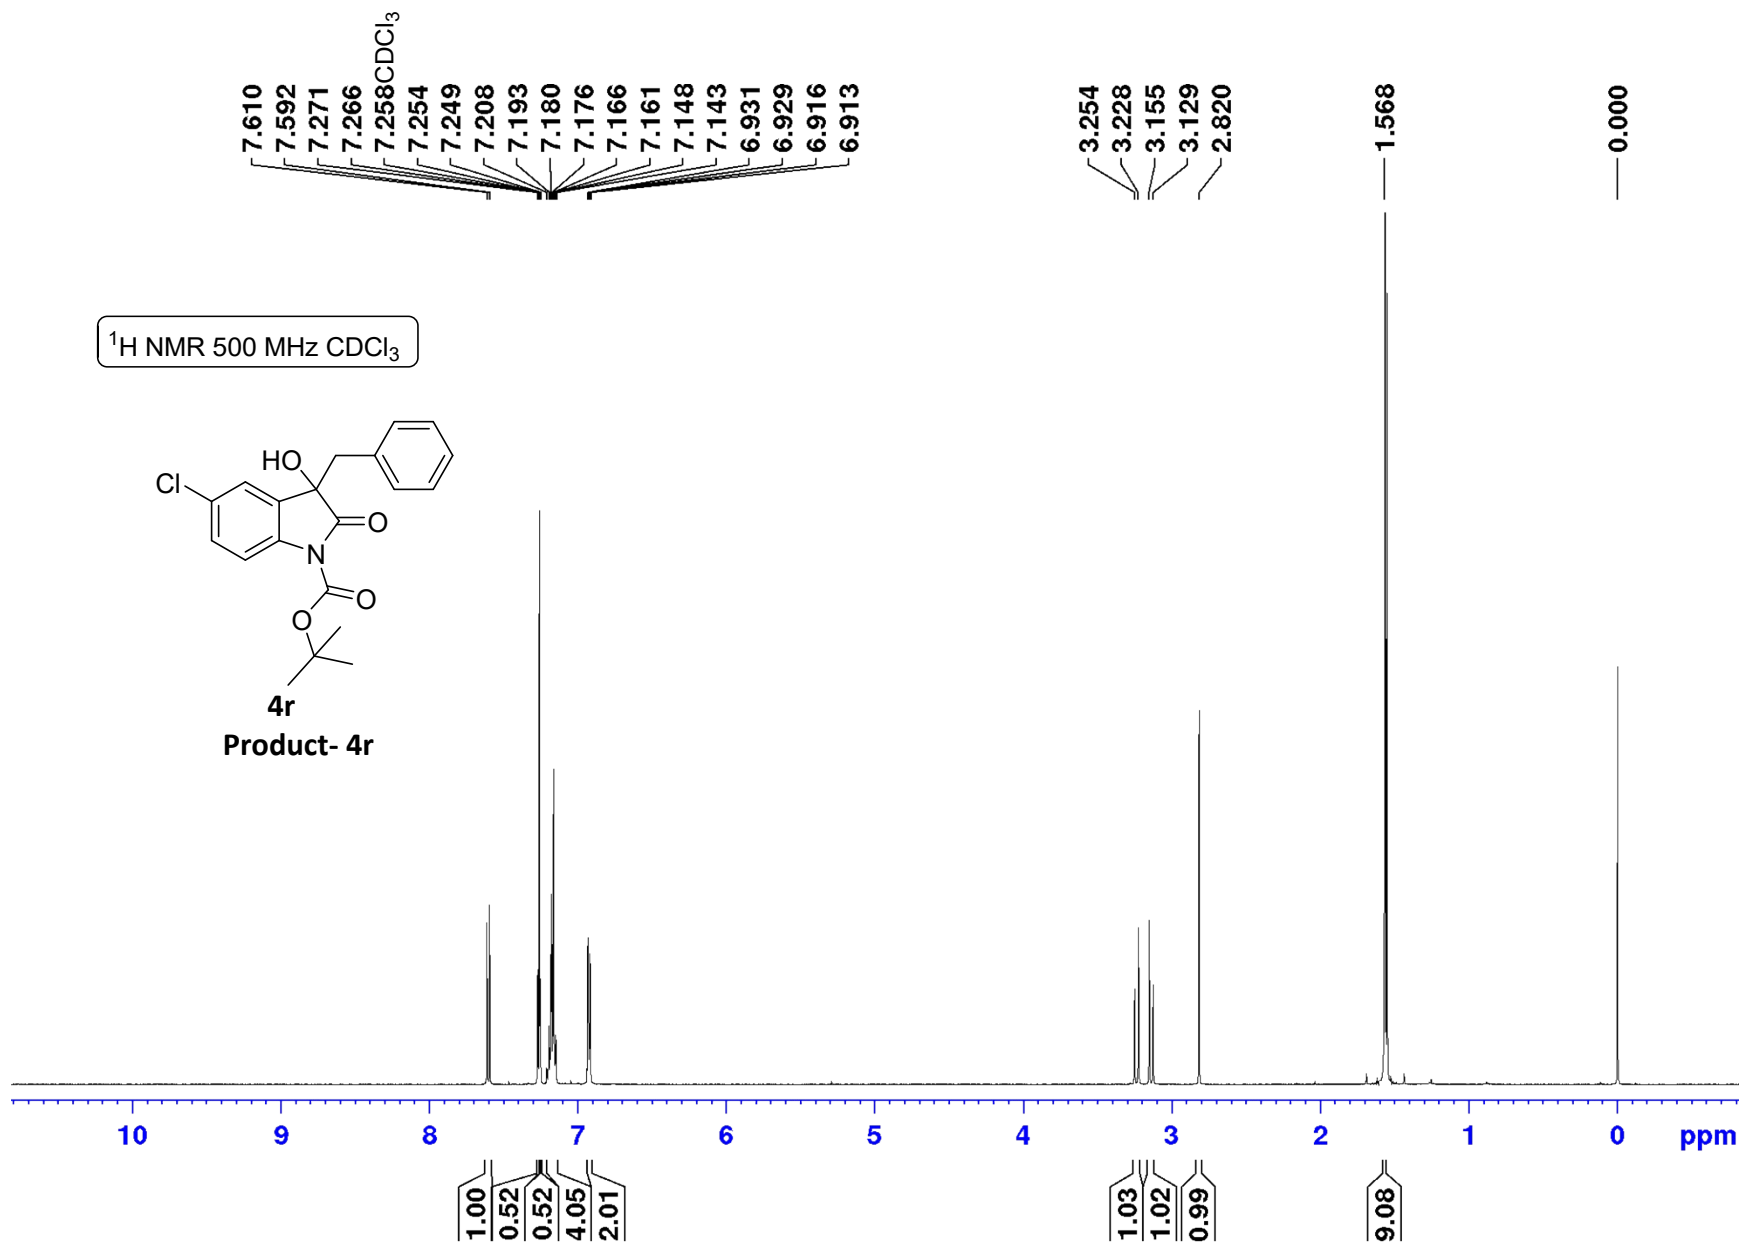

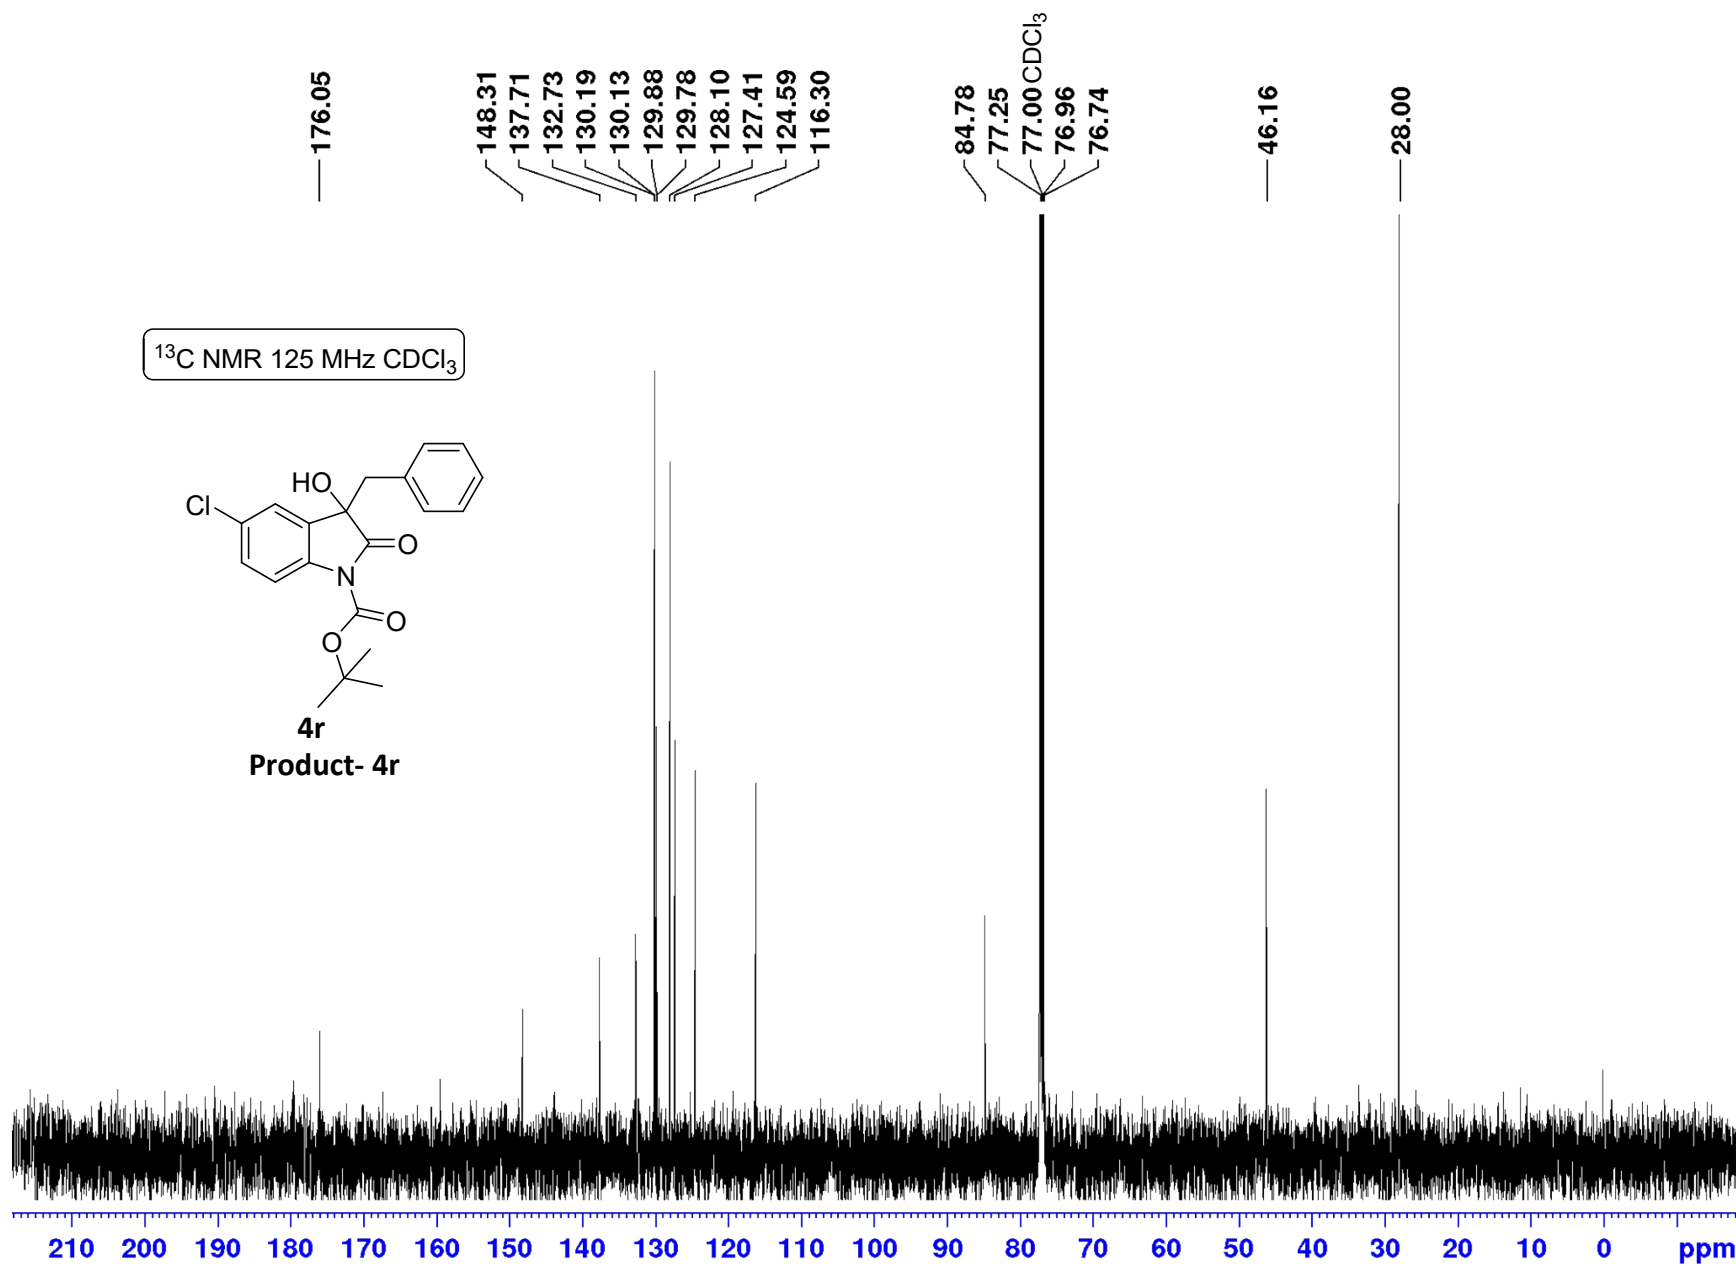

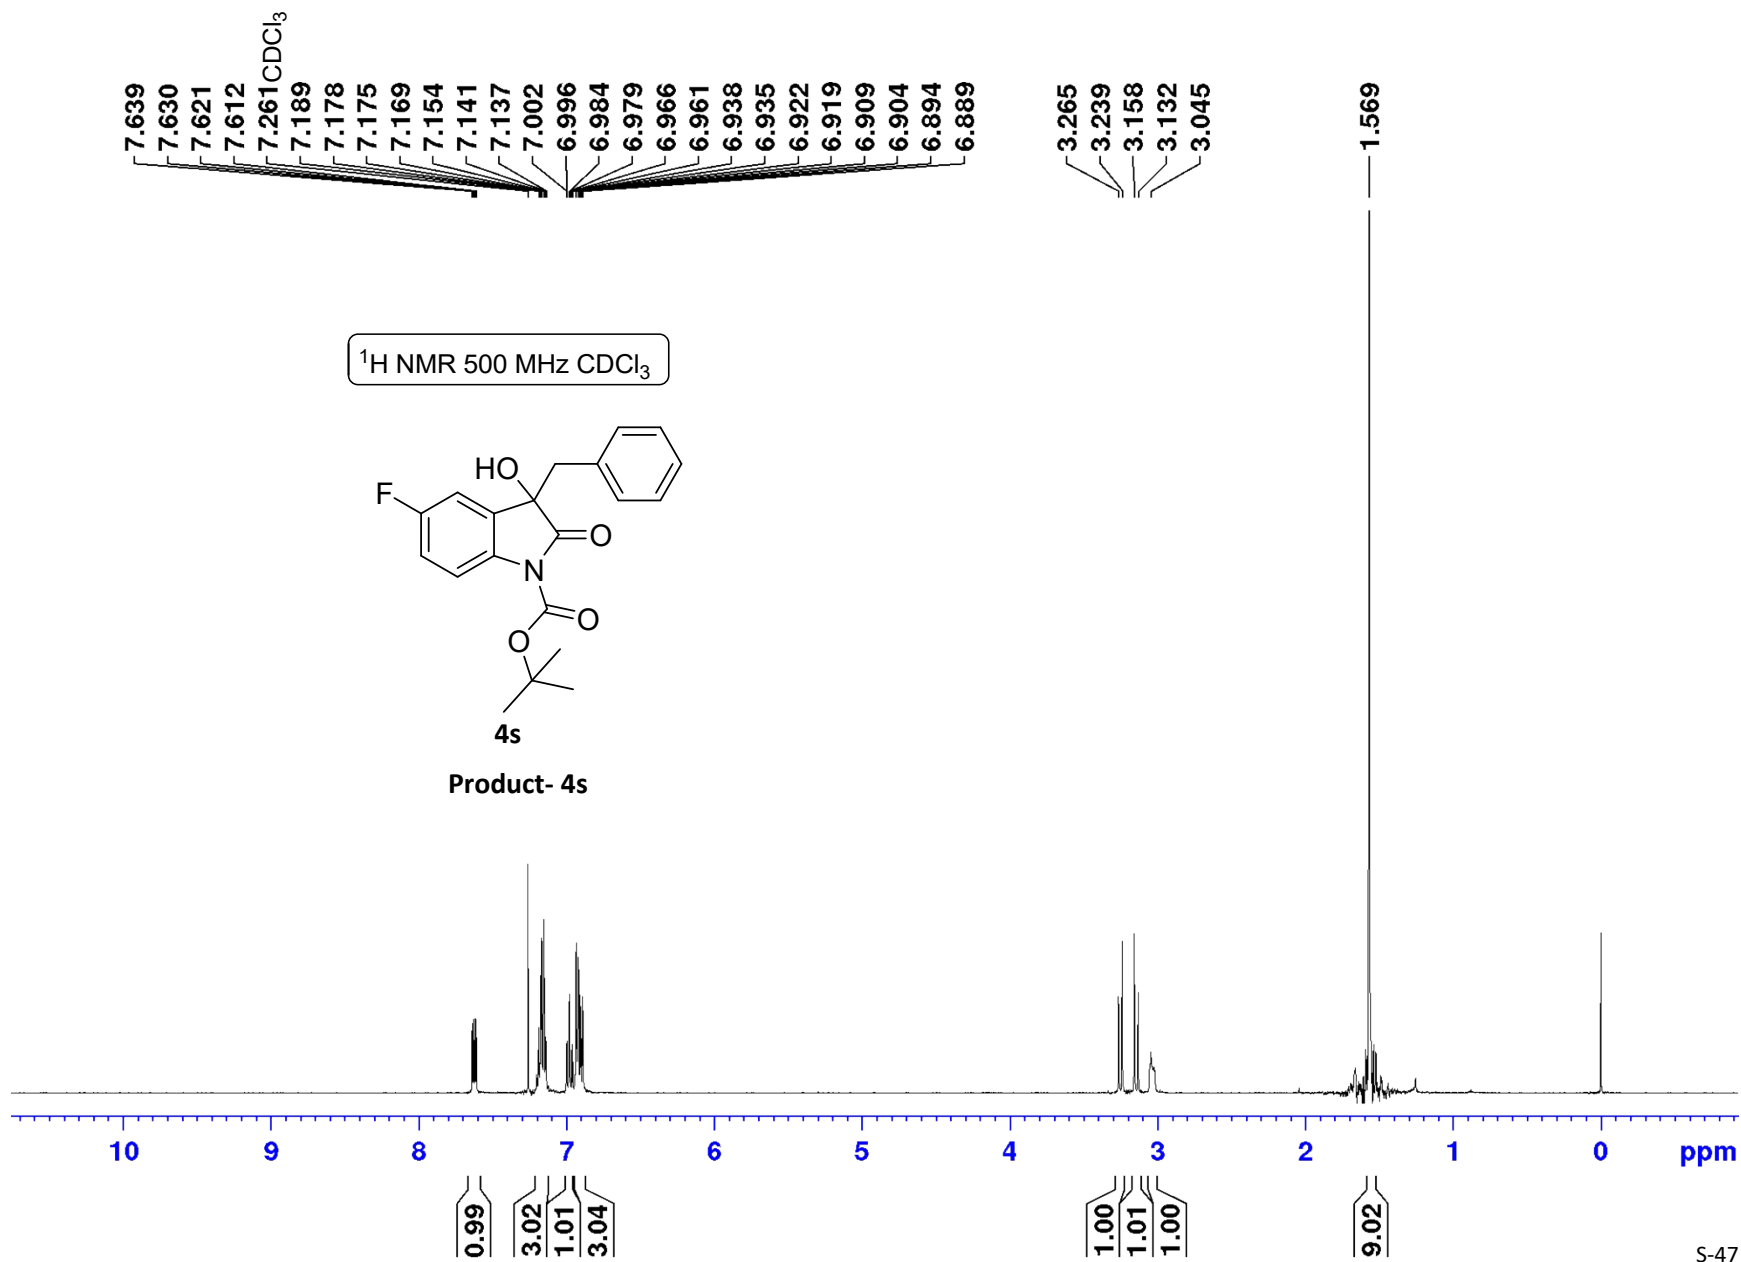

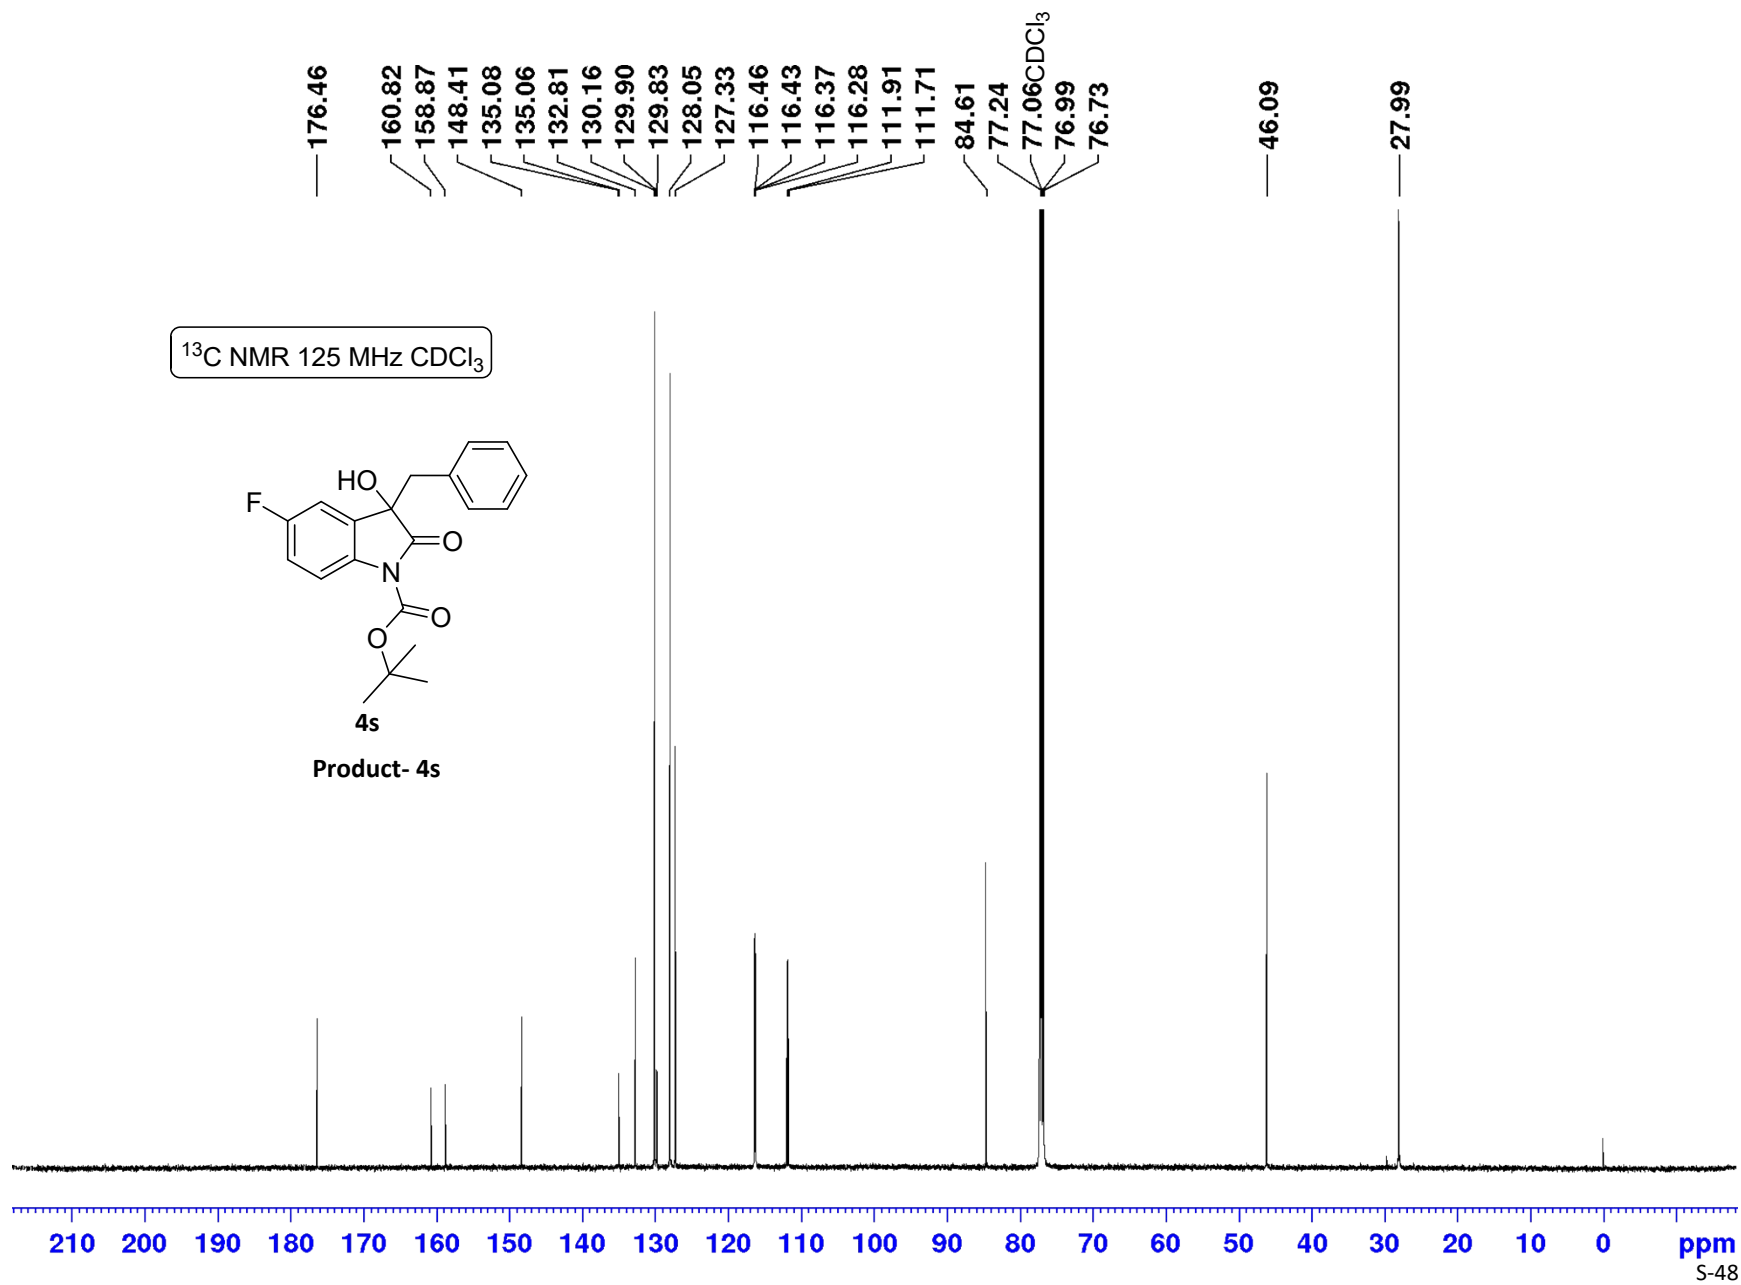



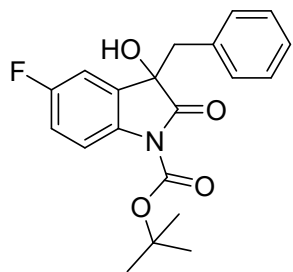

**4s**  
**Product- 4s**

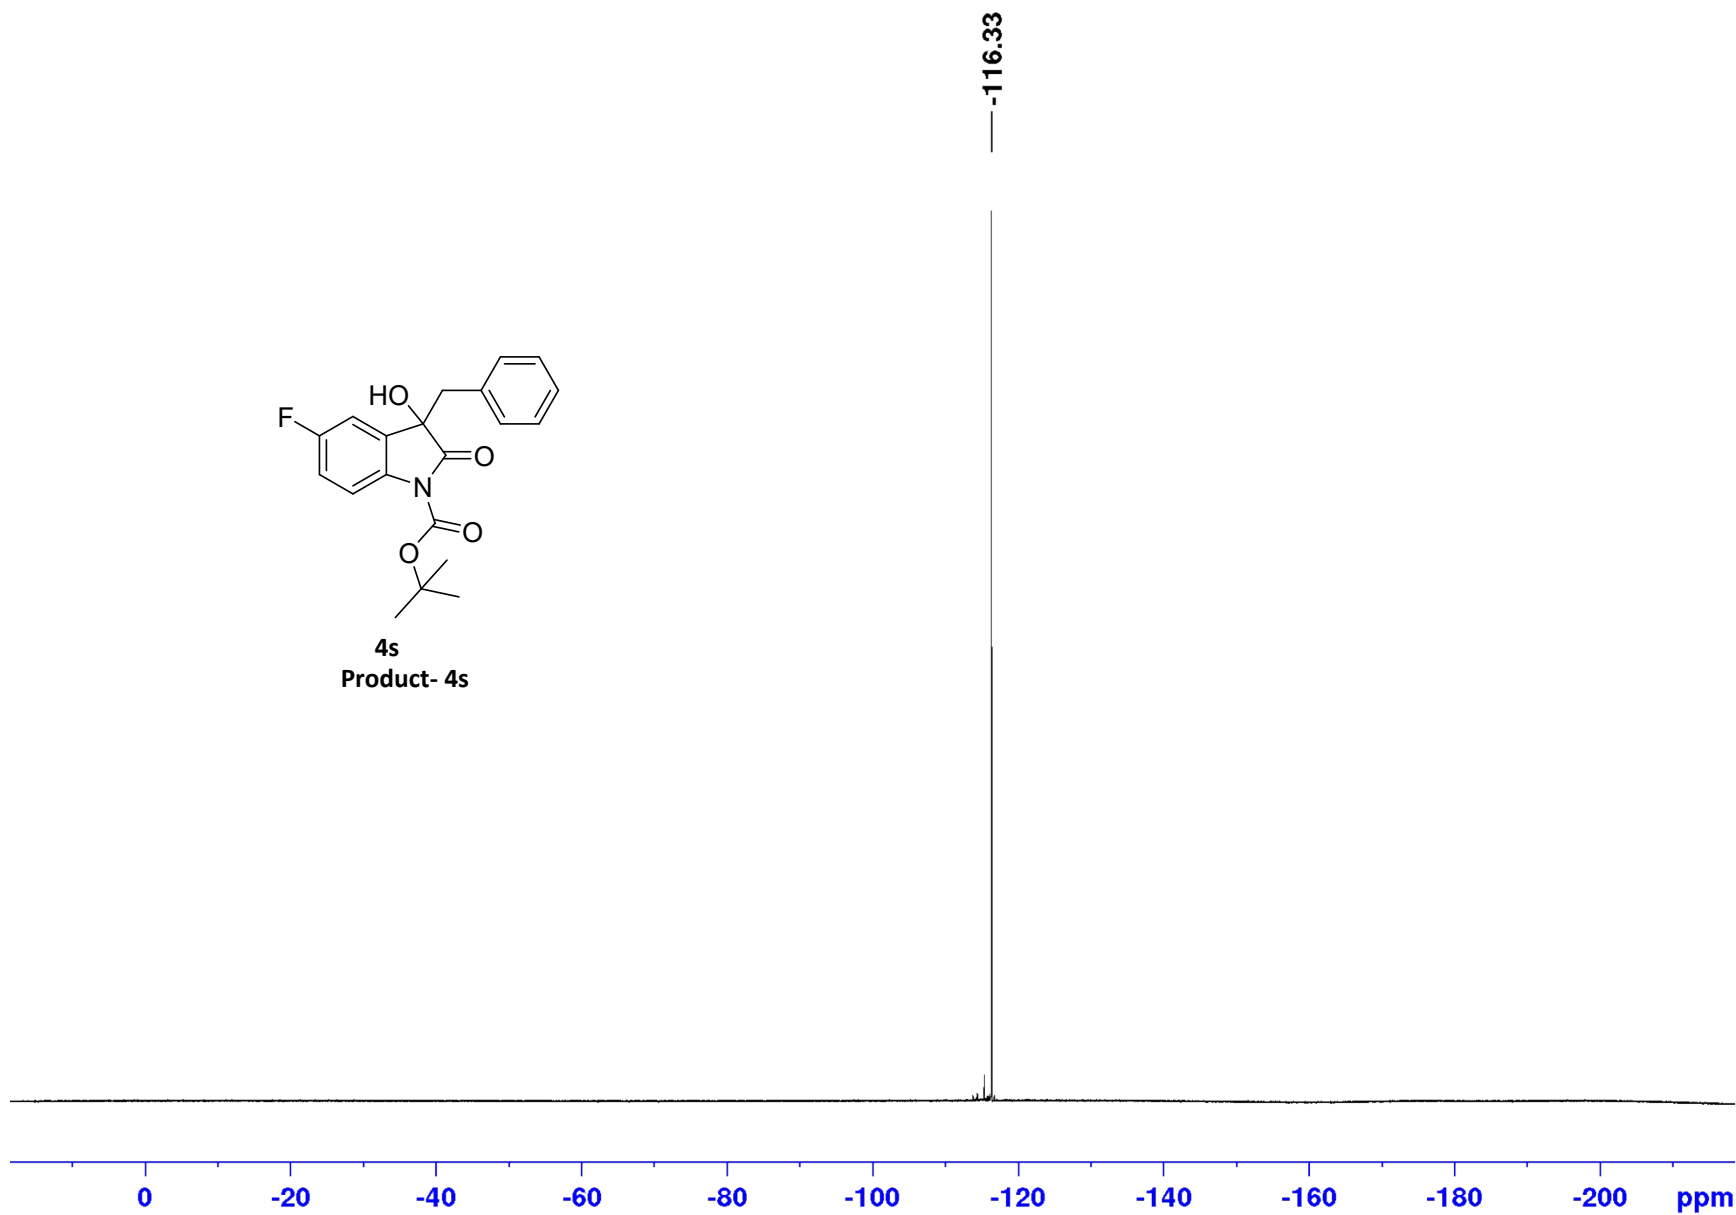

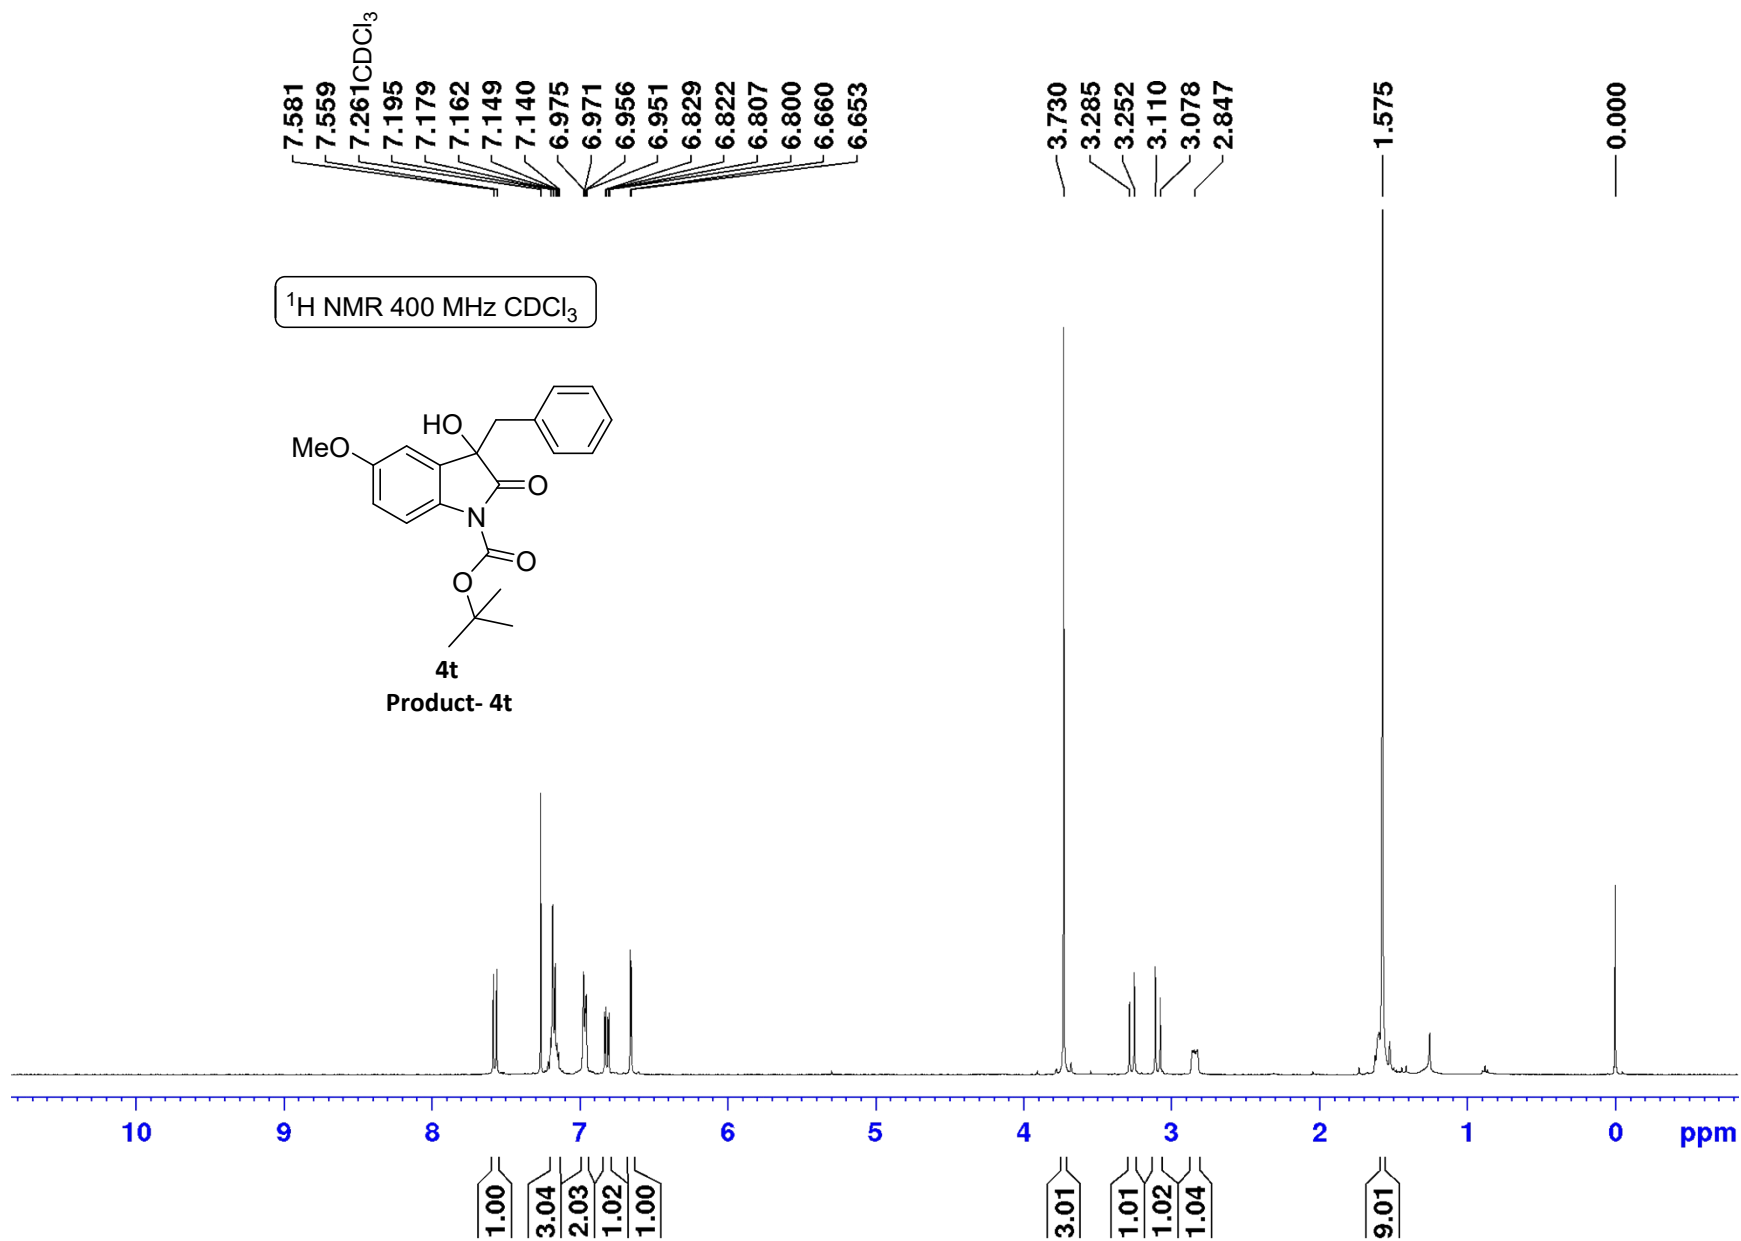

<sup>13</sup>C NMR 125 MHz CDCl<sub>3</sub>

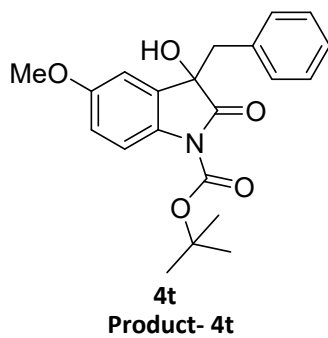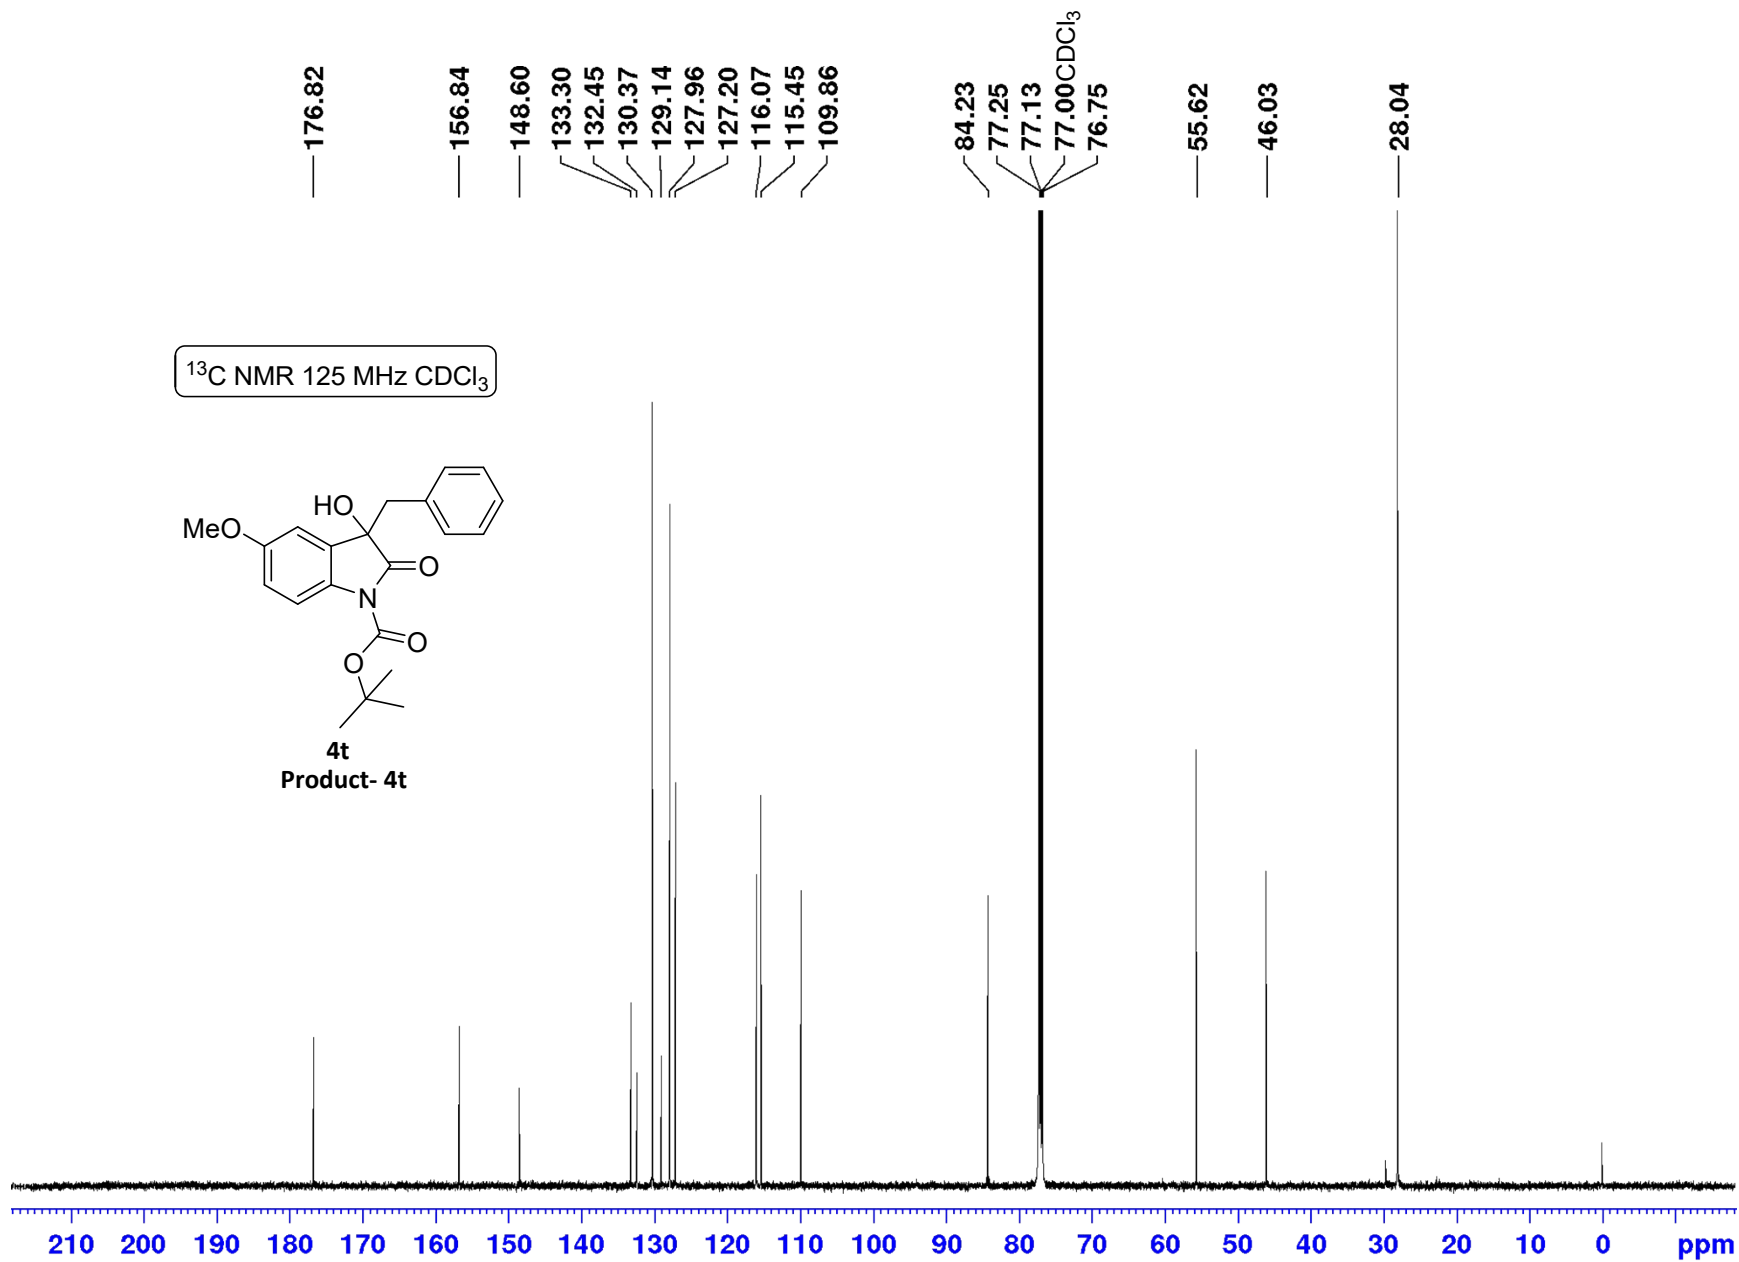

<sup>1</sup>H NMR 500 MHz CDCl<sub>3</sub>

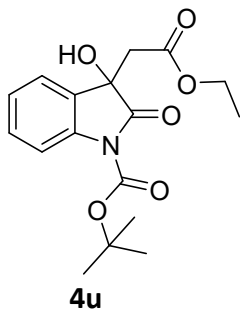

Product-4u

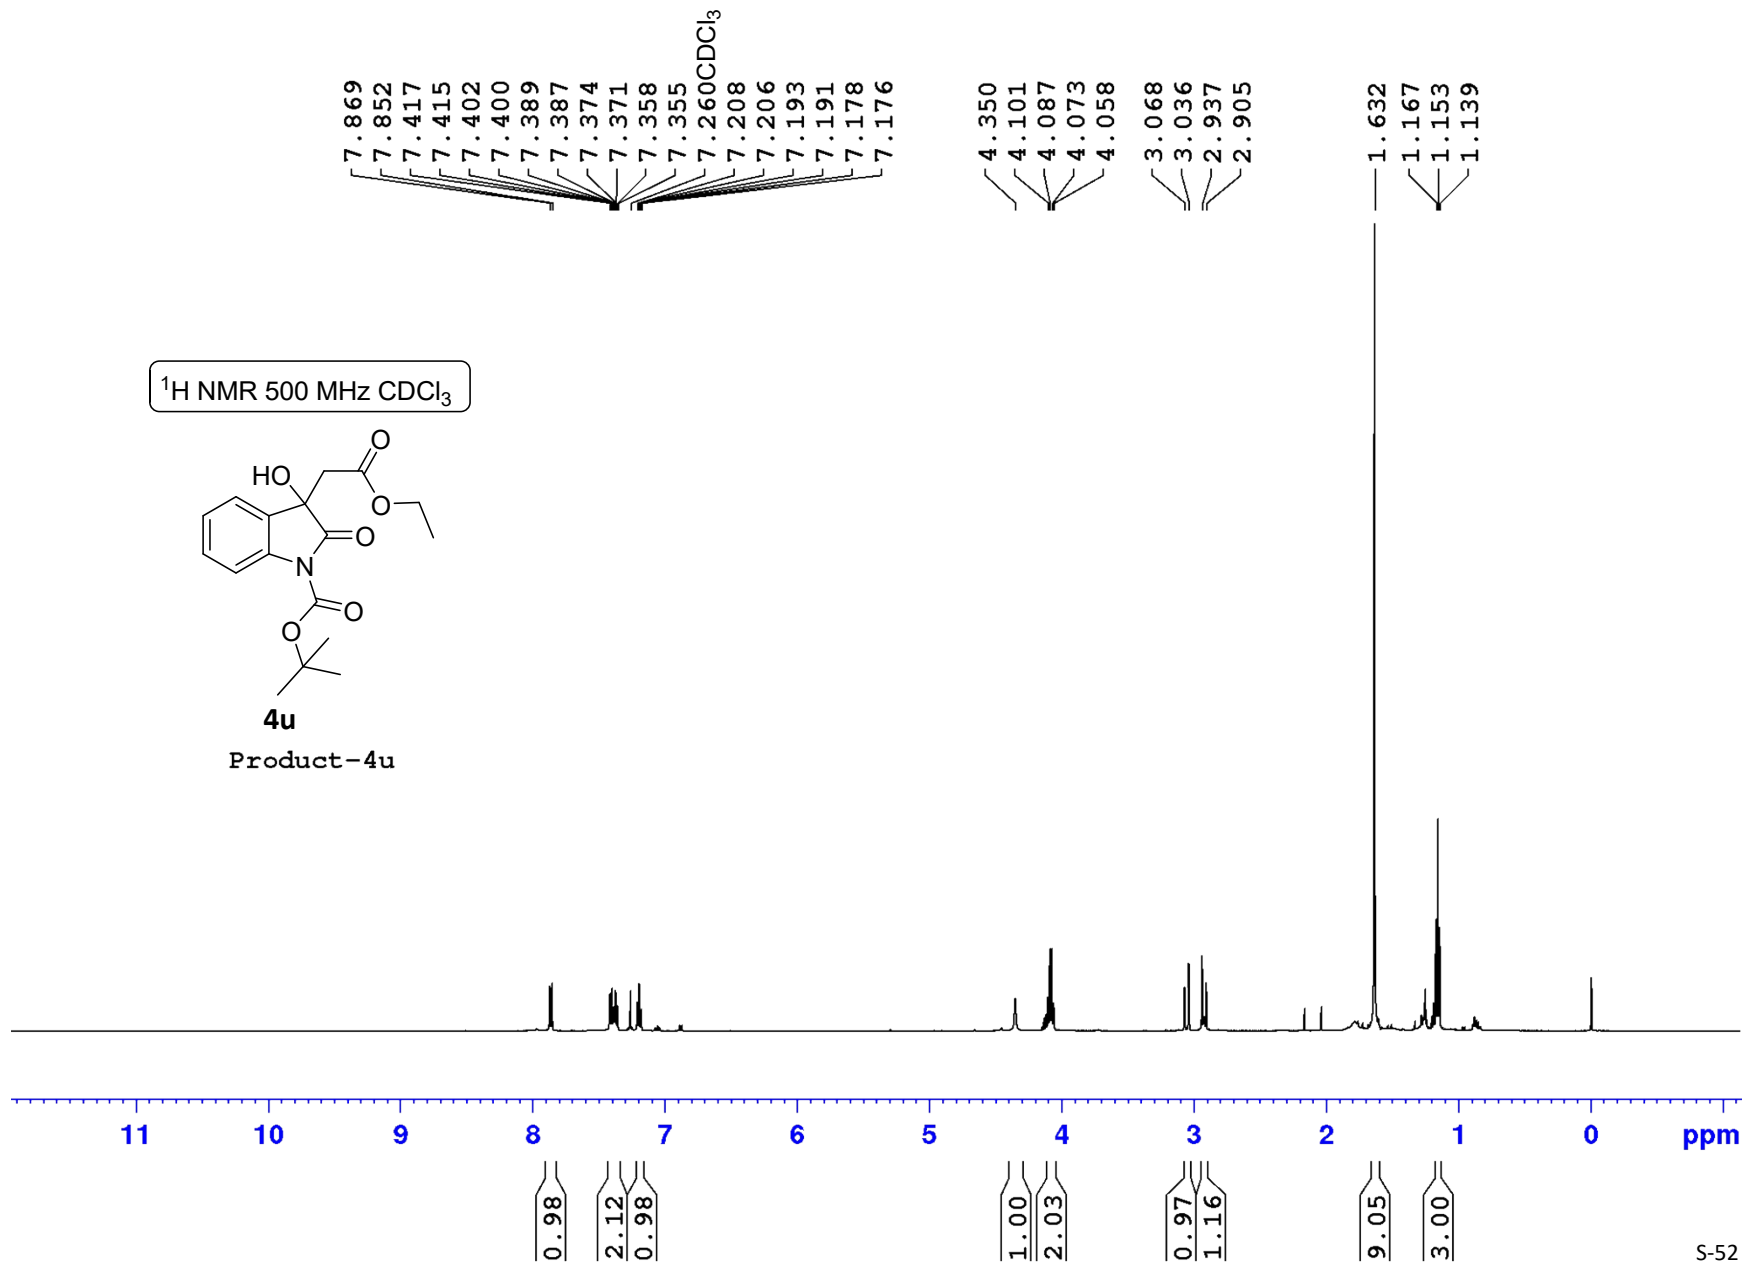

<sup>13</sup>C NMR 125 MHz CDCl<sub>3</sub>

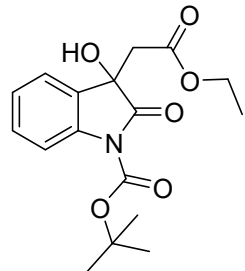

**4u**

Product-4u

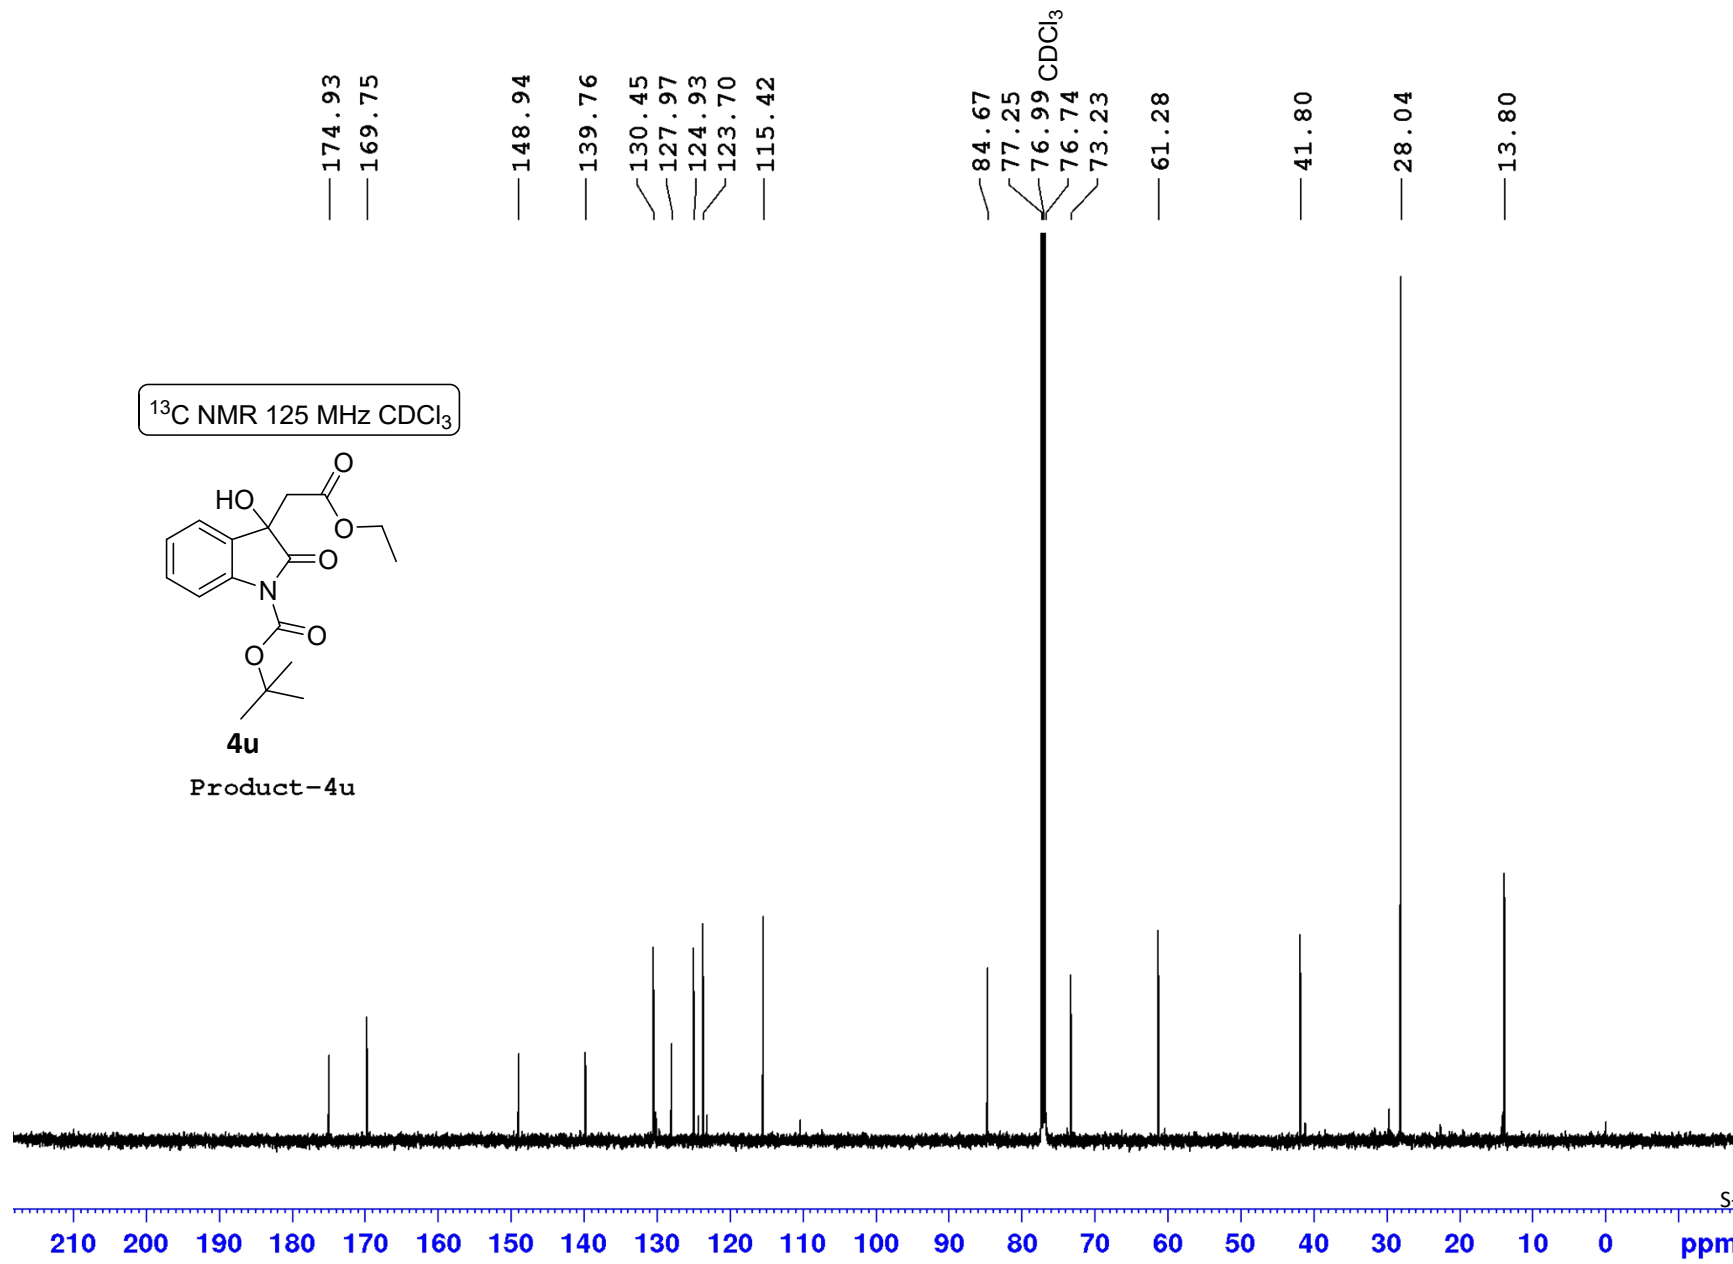

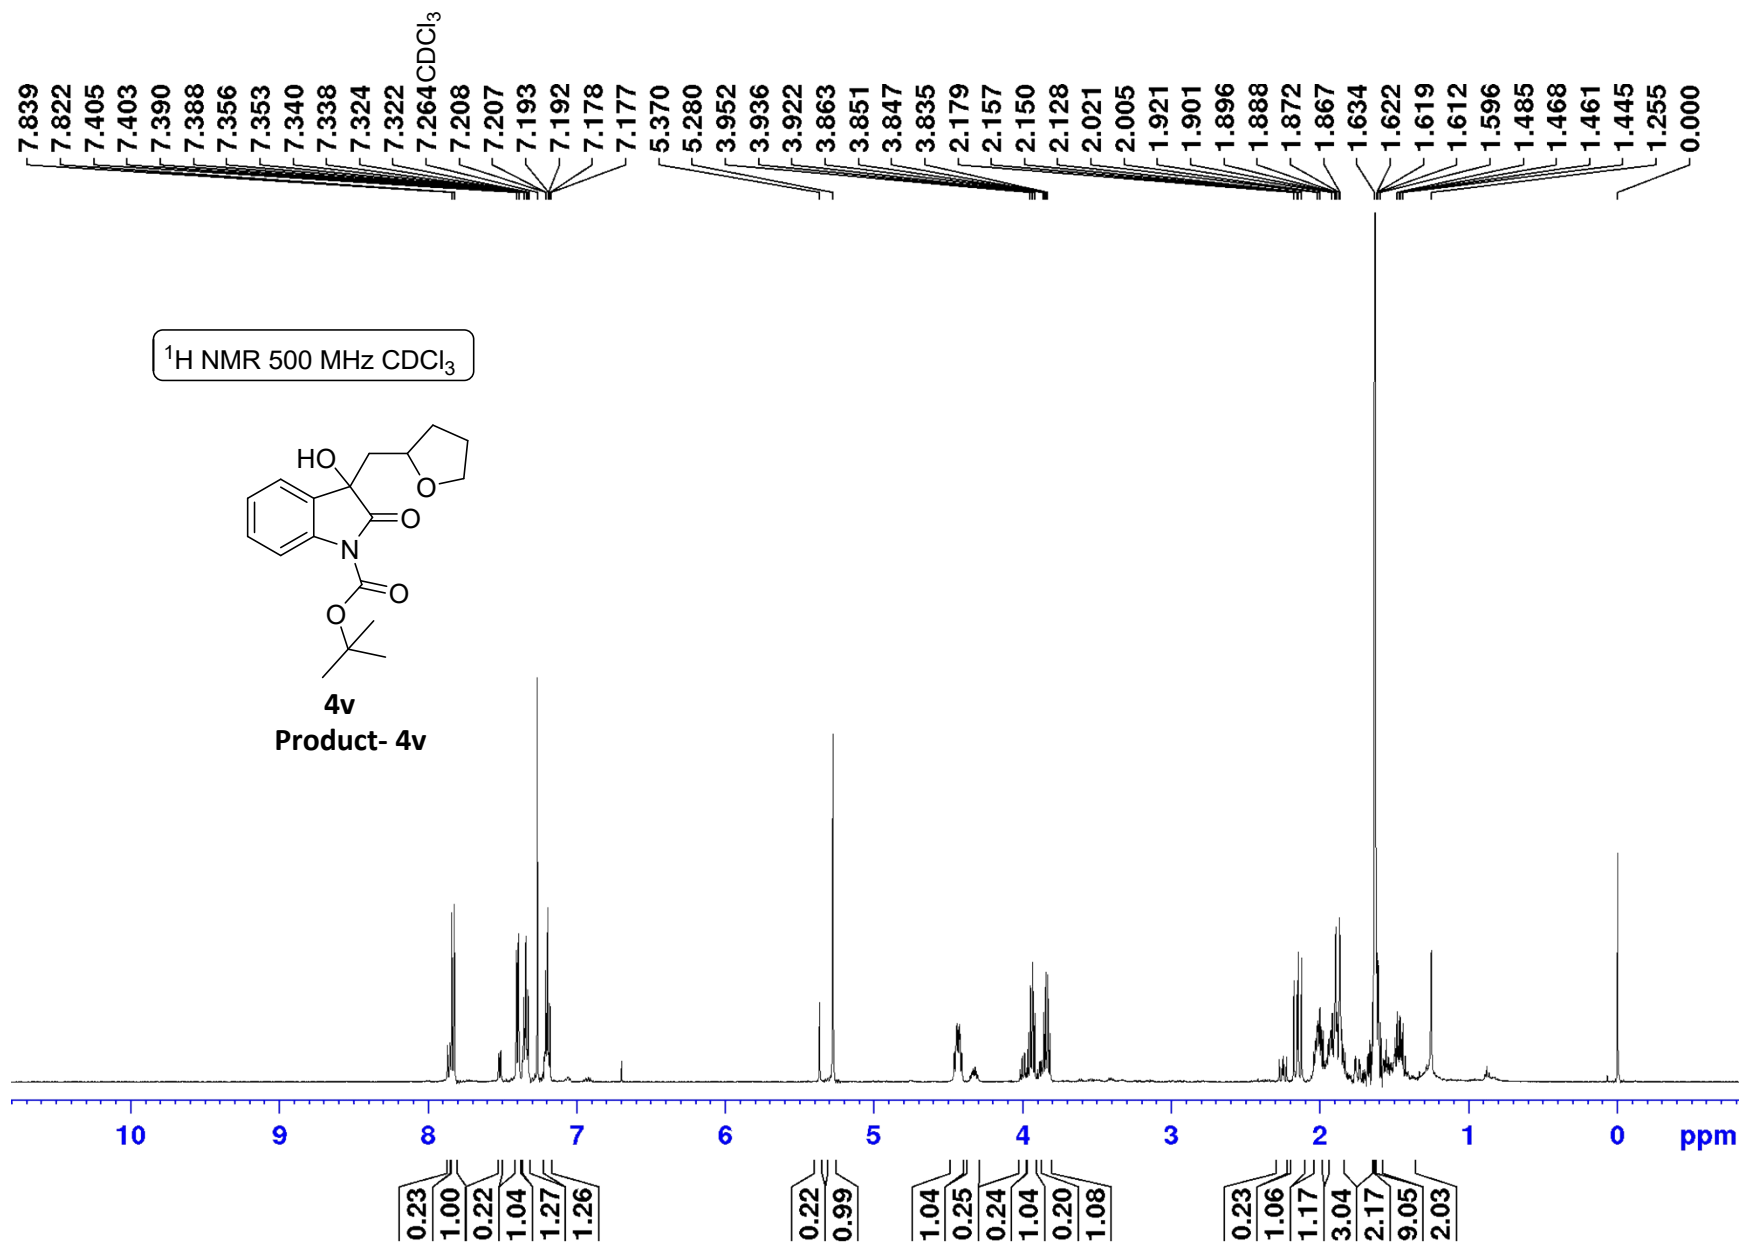

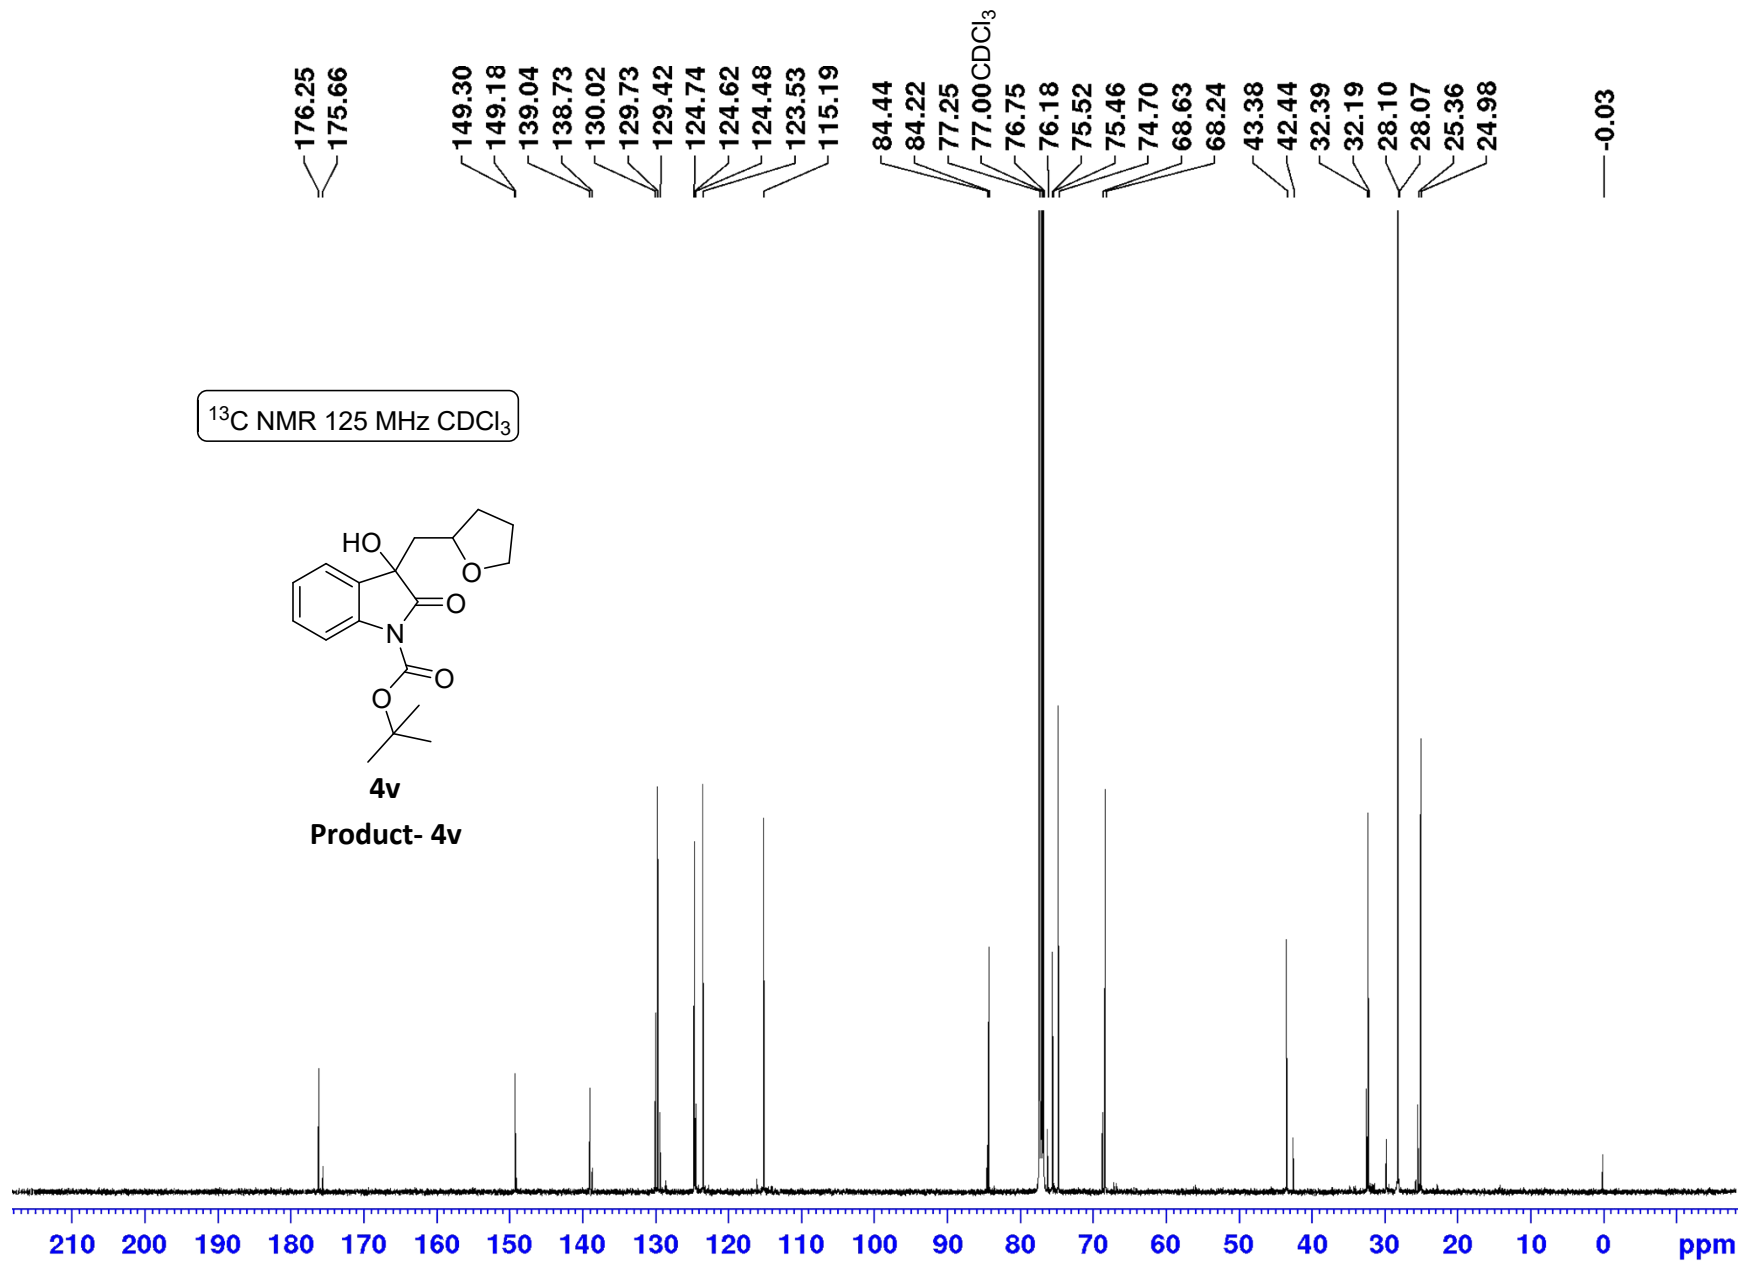

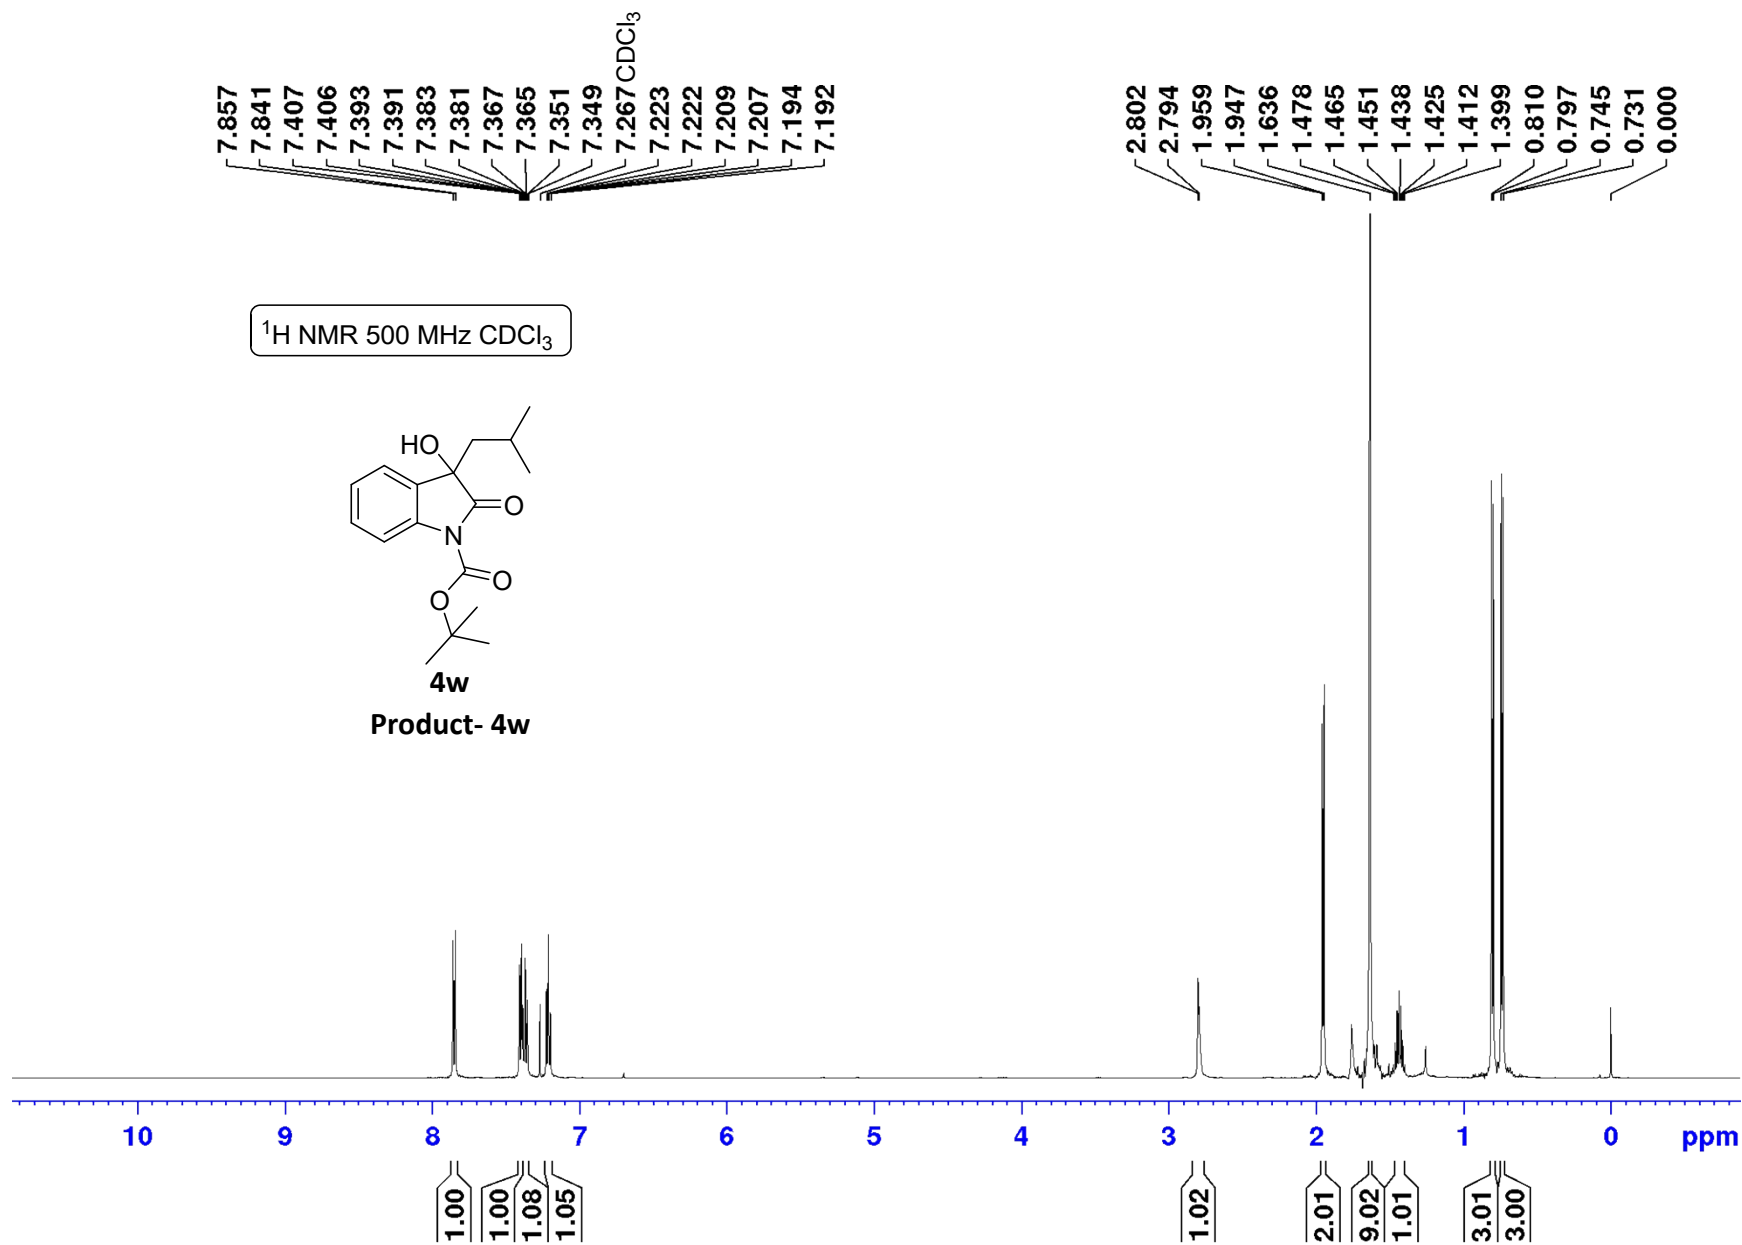



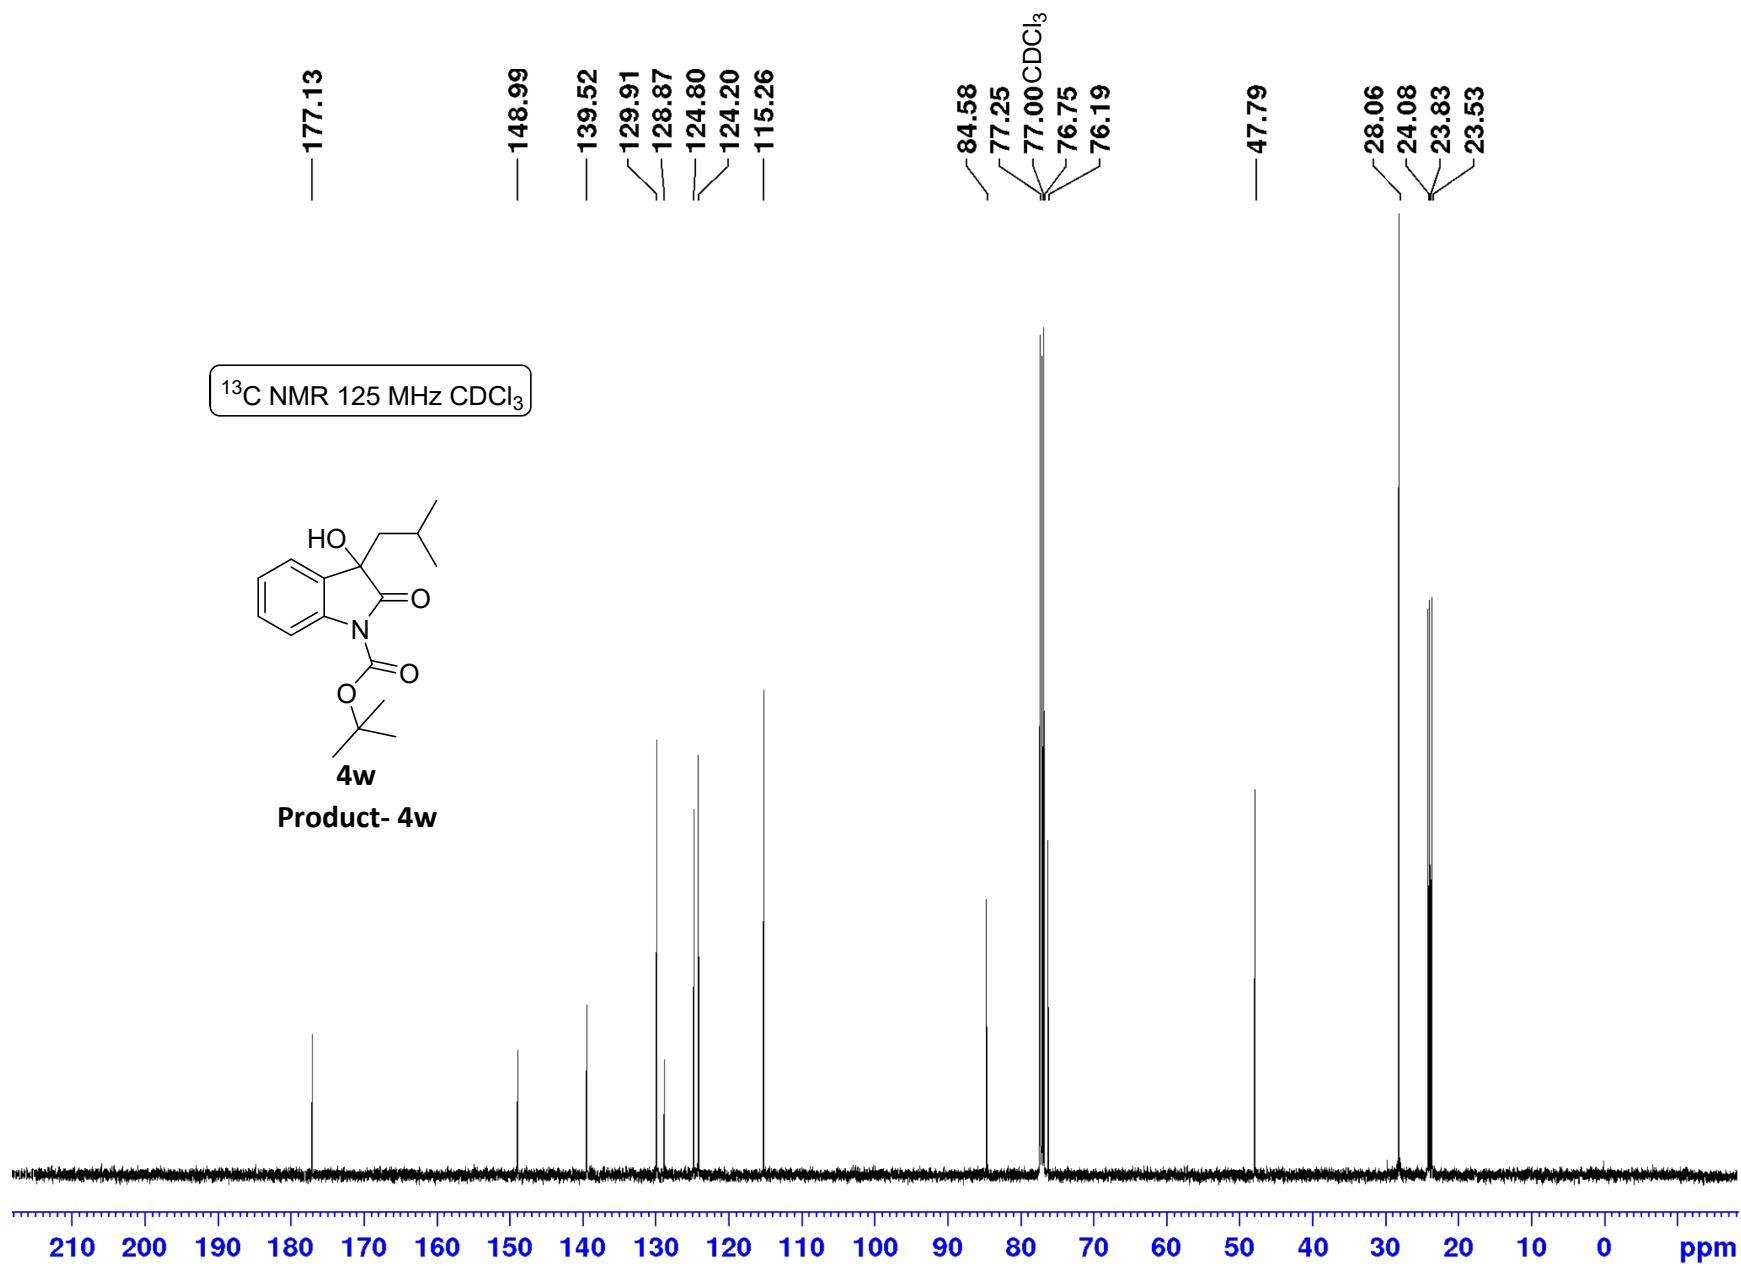

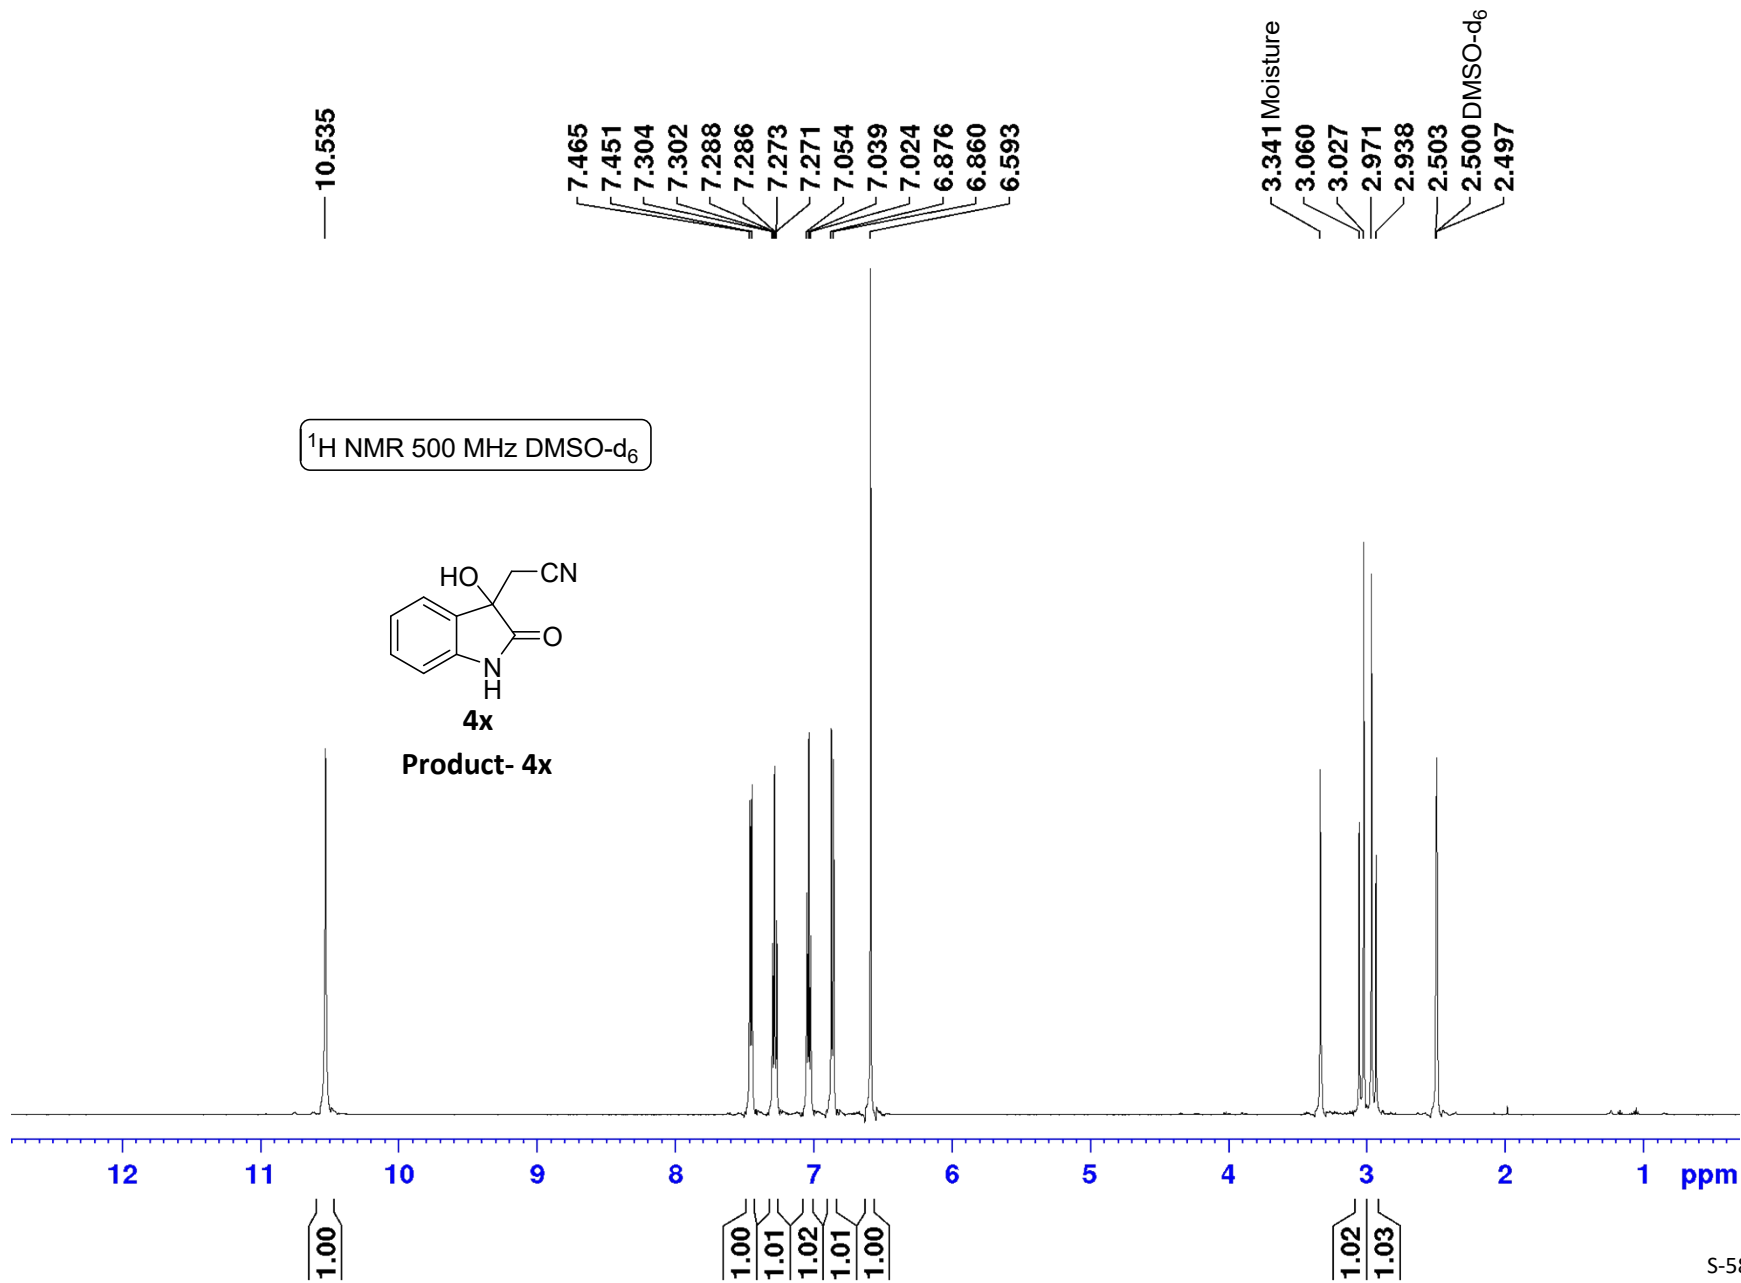

<sup>13</sup>C NMR 125 MHz DMSO-d<sub>6</sub>

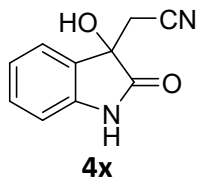

**Product- 4x**

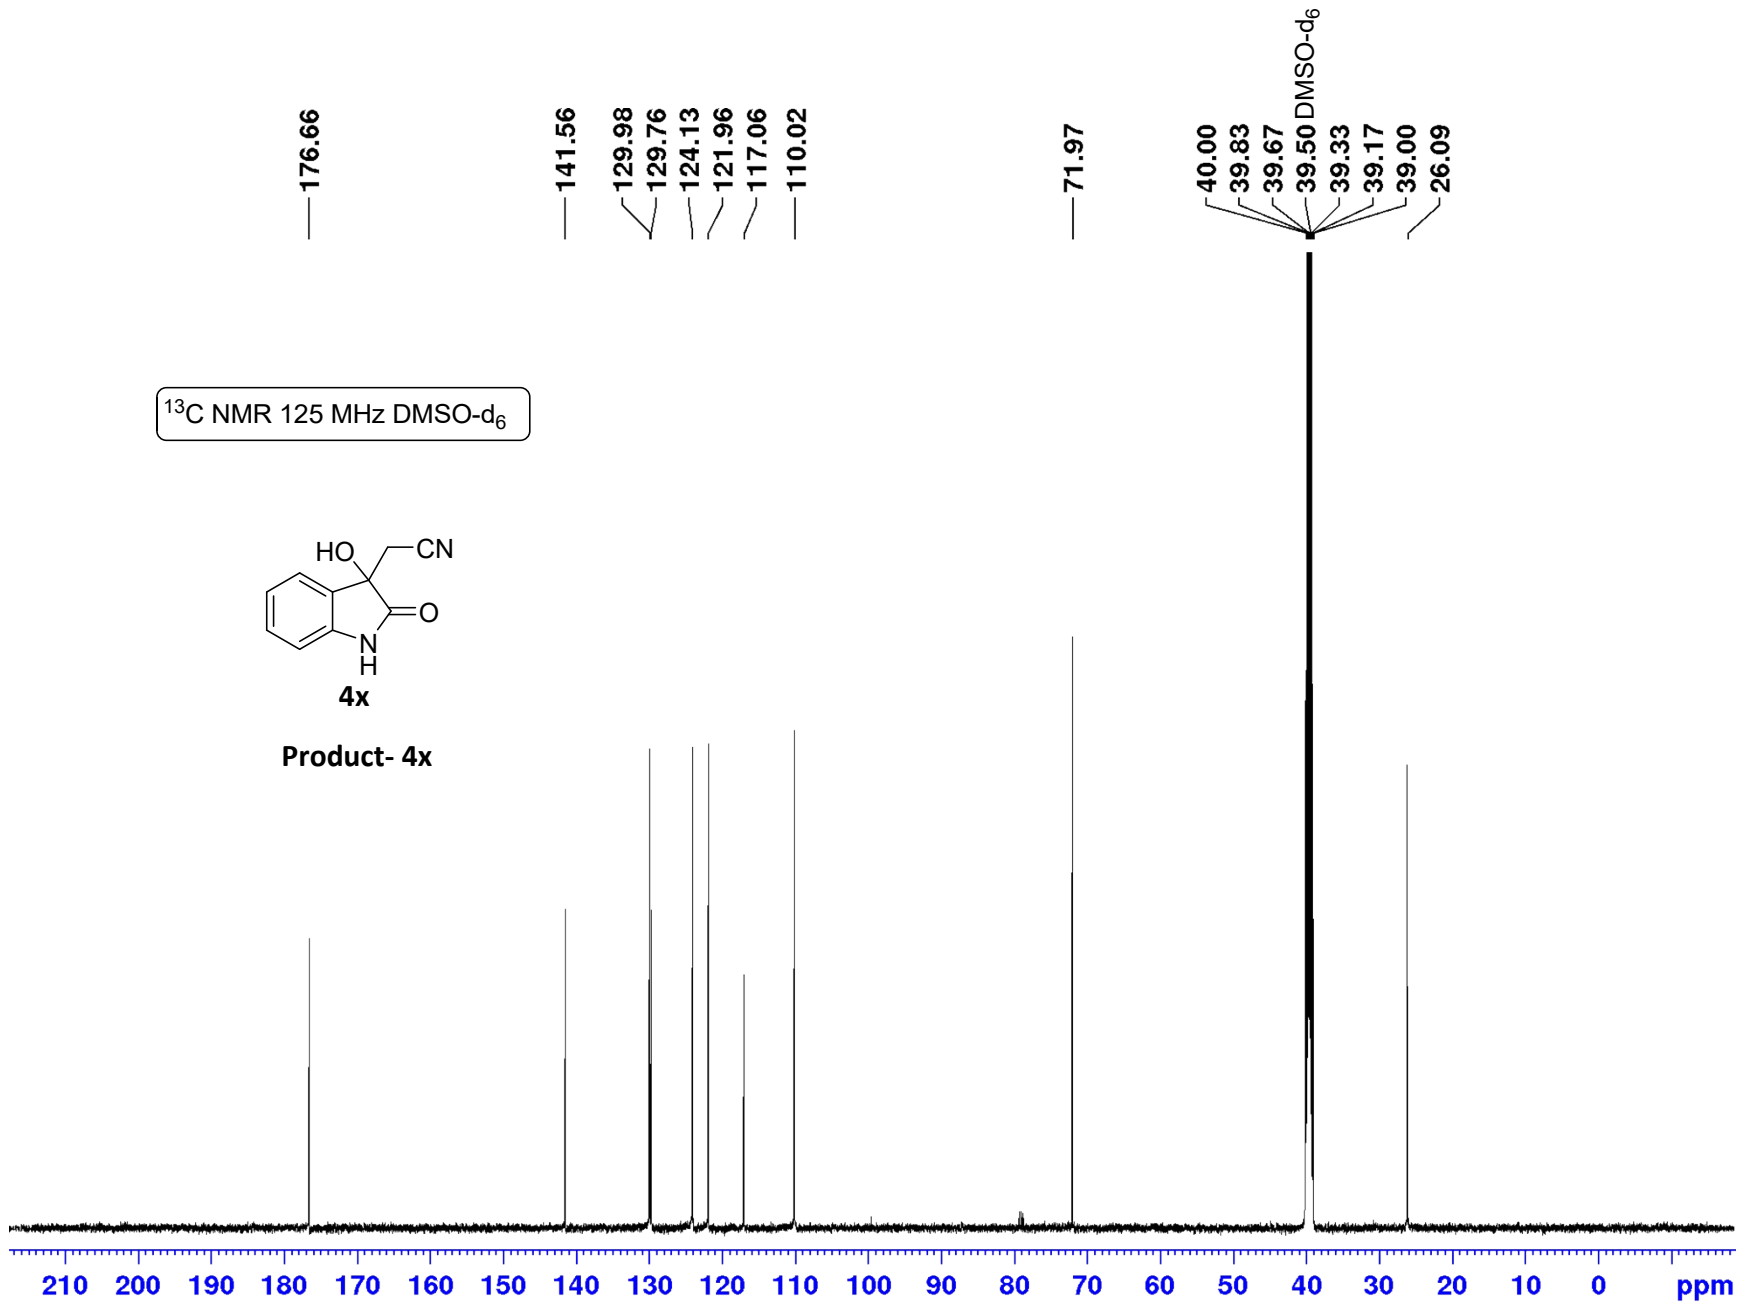

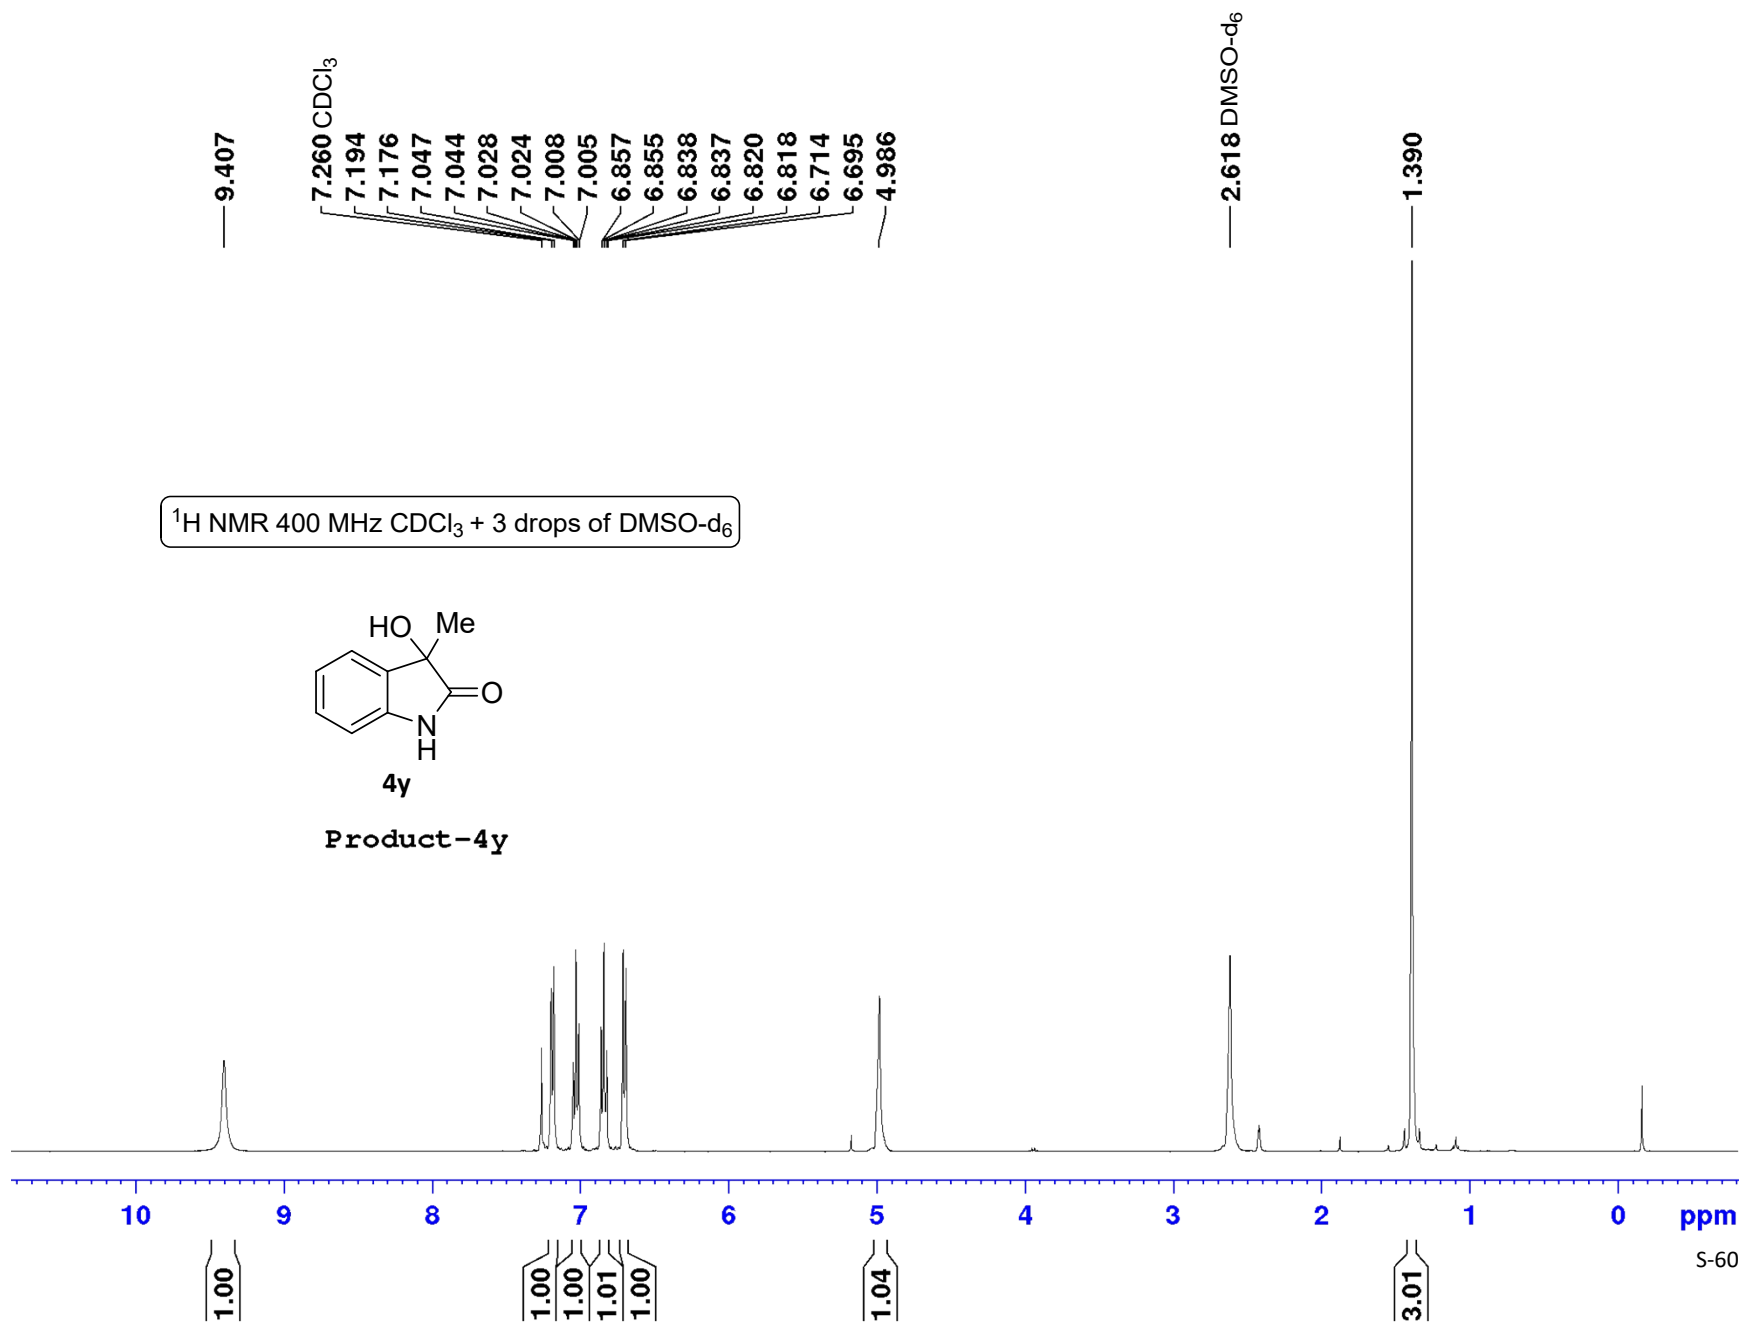

$^{13}\text{C}$  NMR 100 MHz  $\text{CDCl}_3$

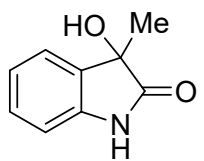

**4y**

**Product-4y**

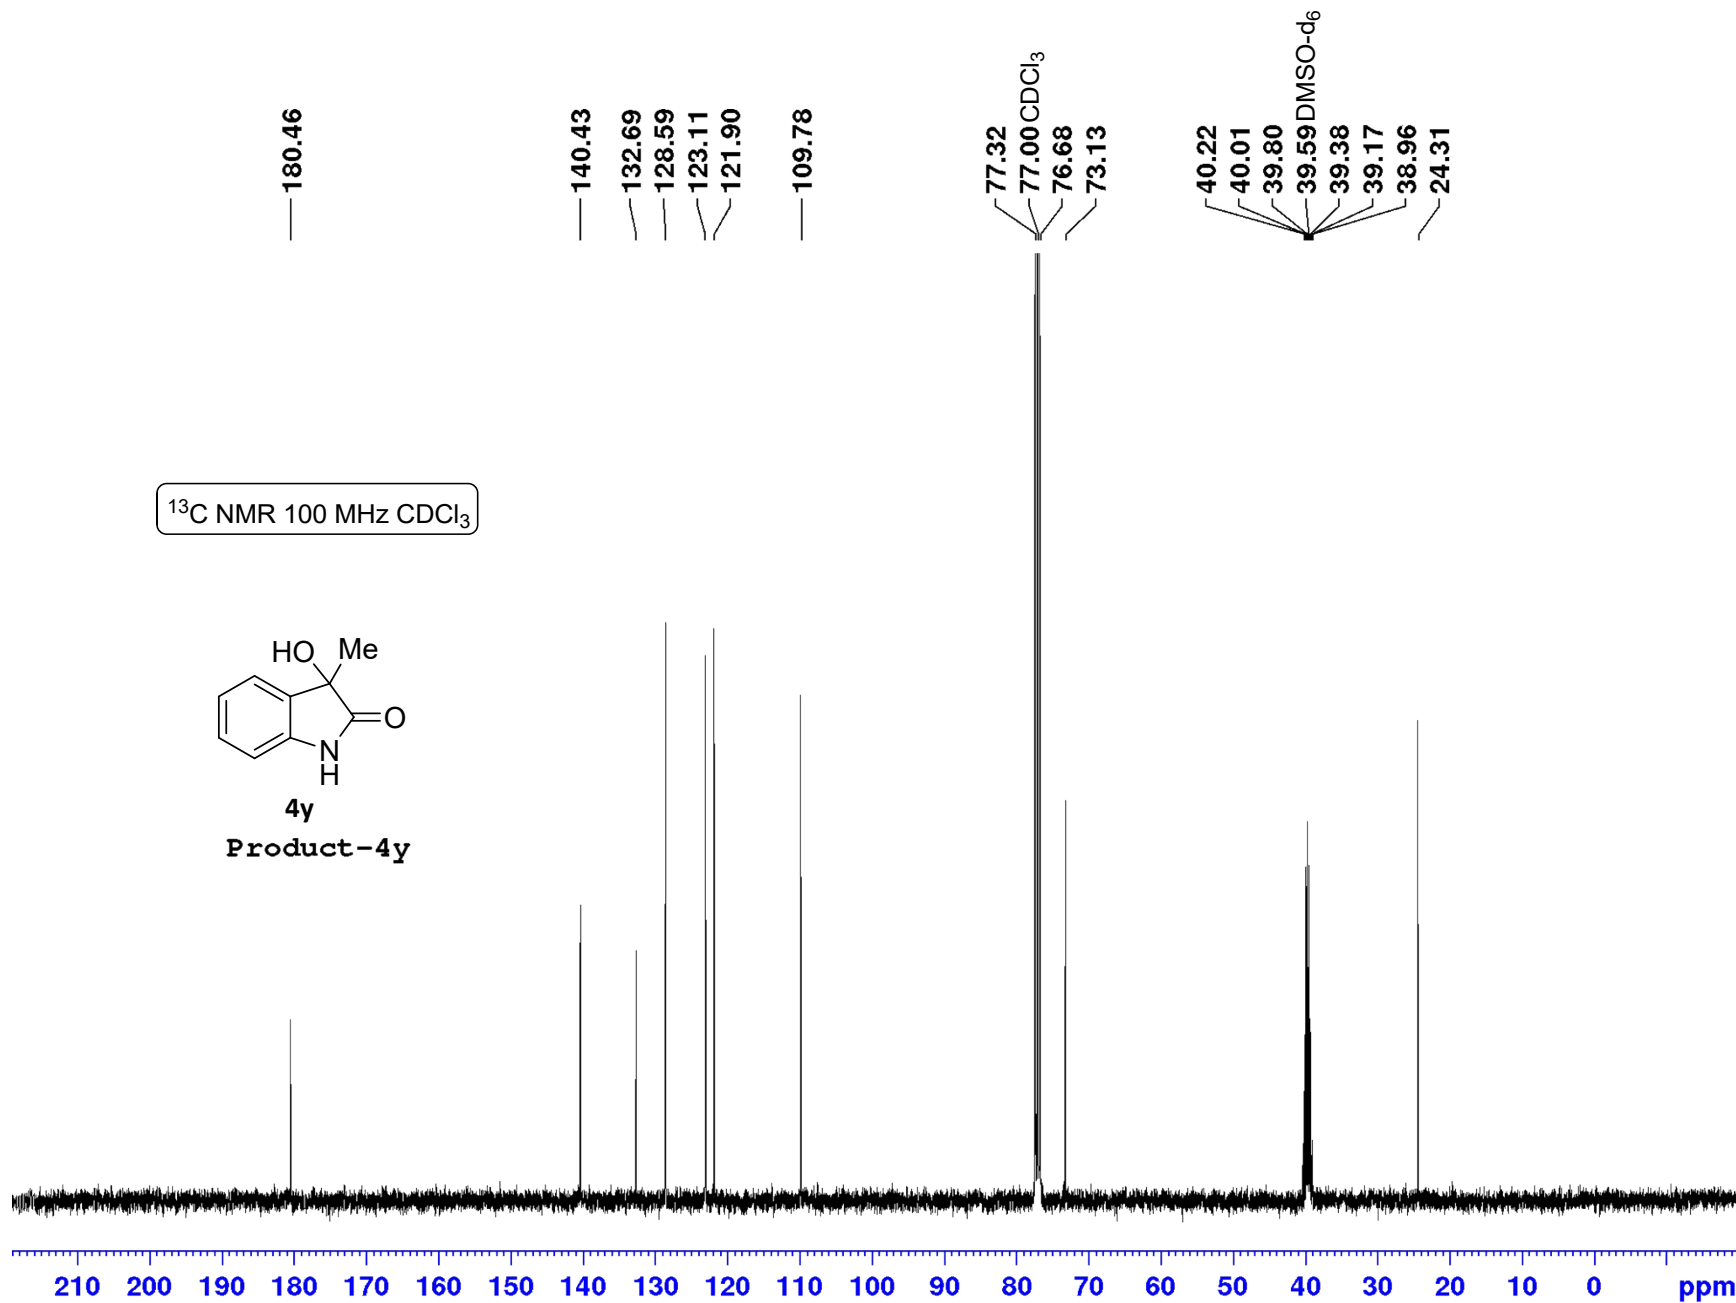

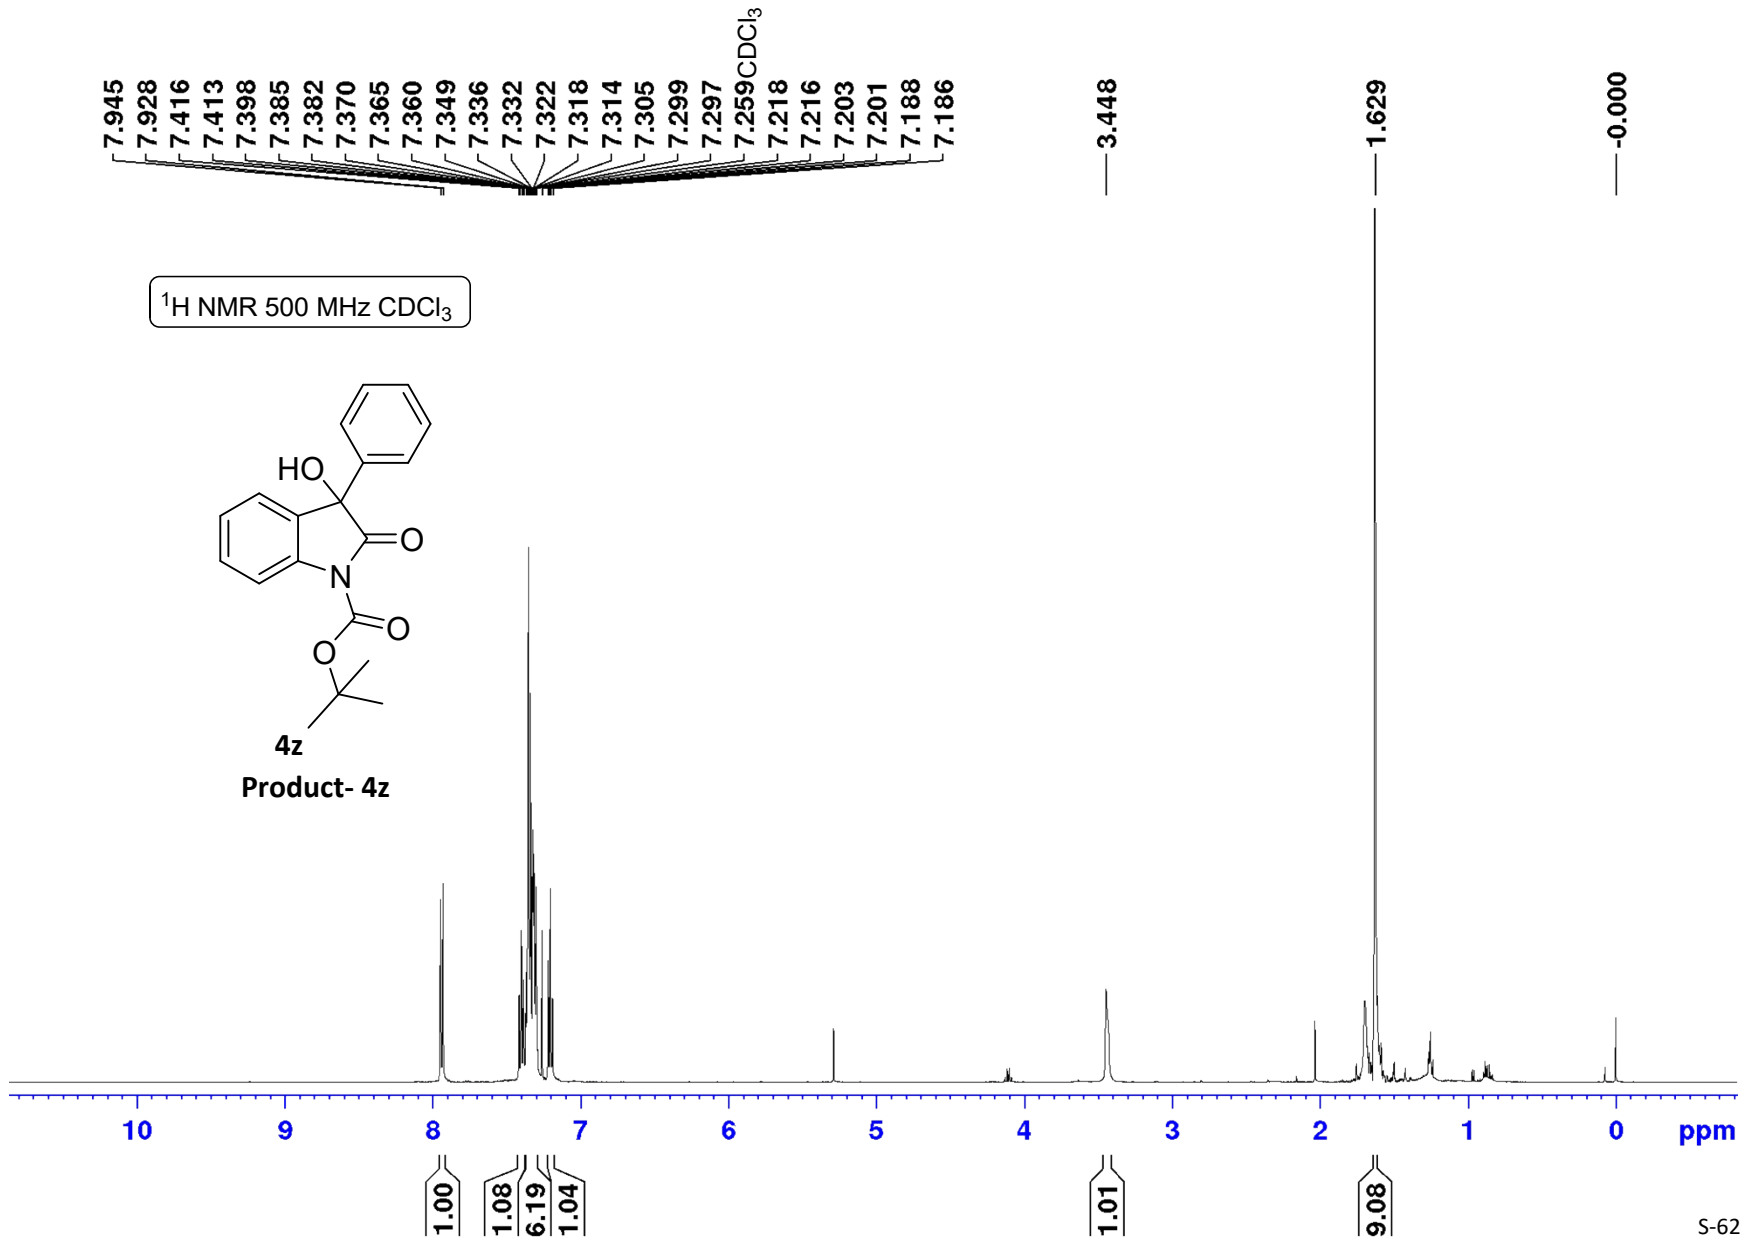

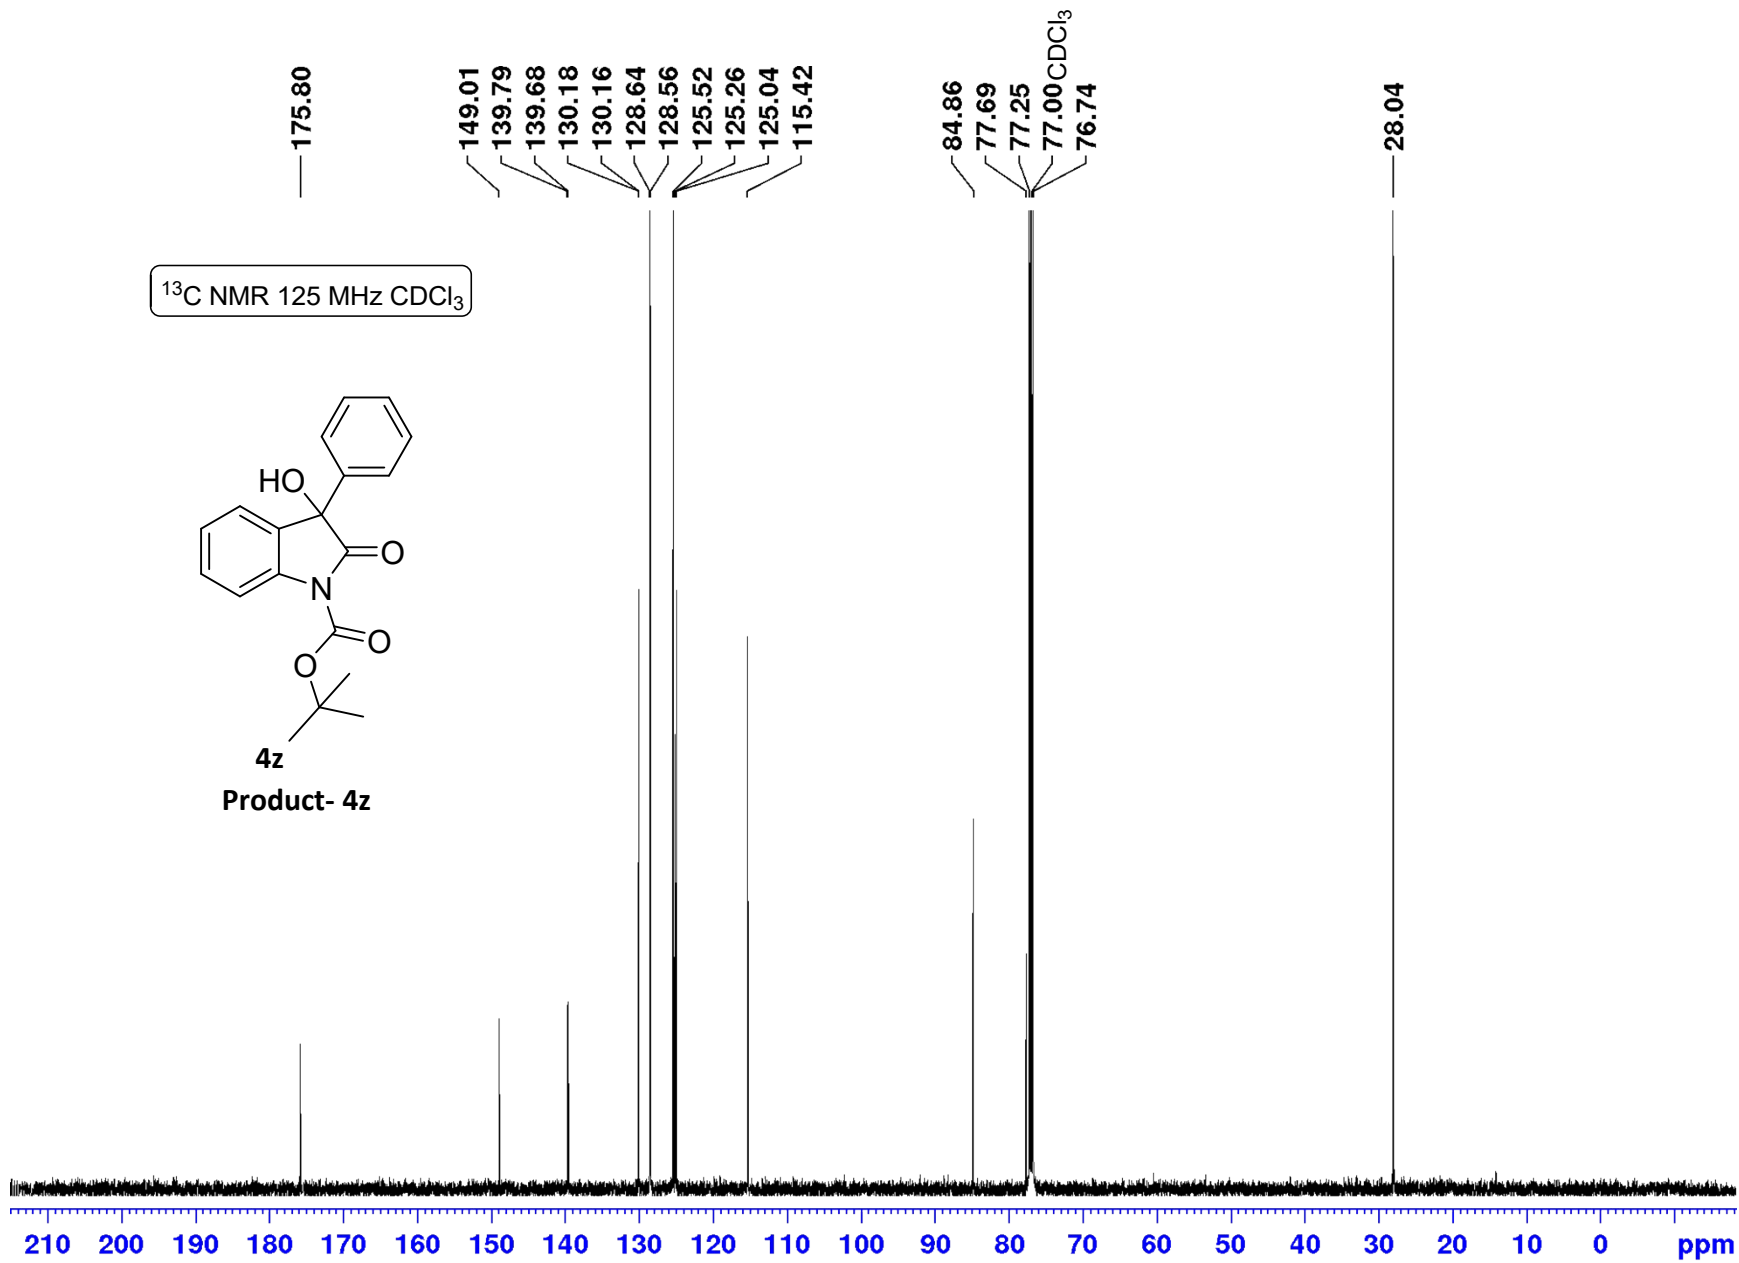

<sup>1</sup>H NMR 500 MHz CDCl<sub>3</sub>

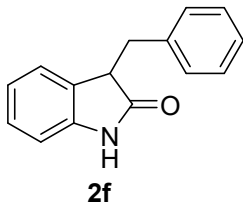

Product-2f

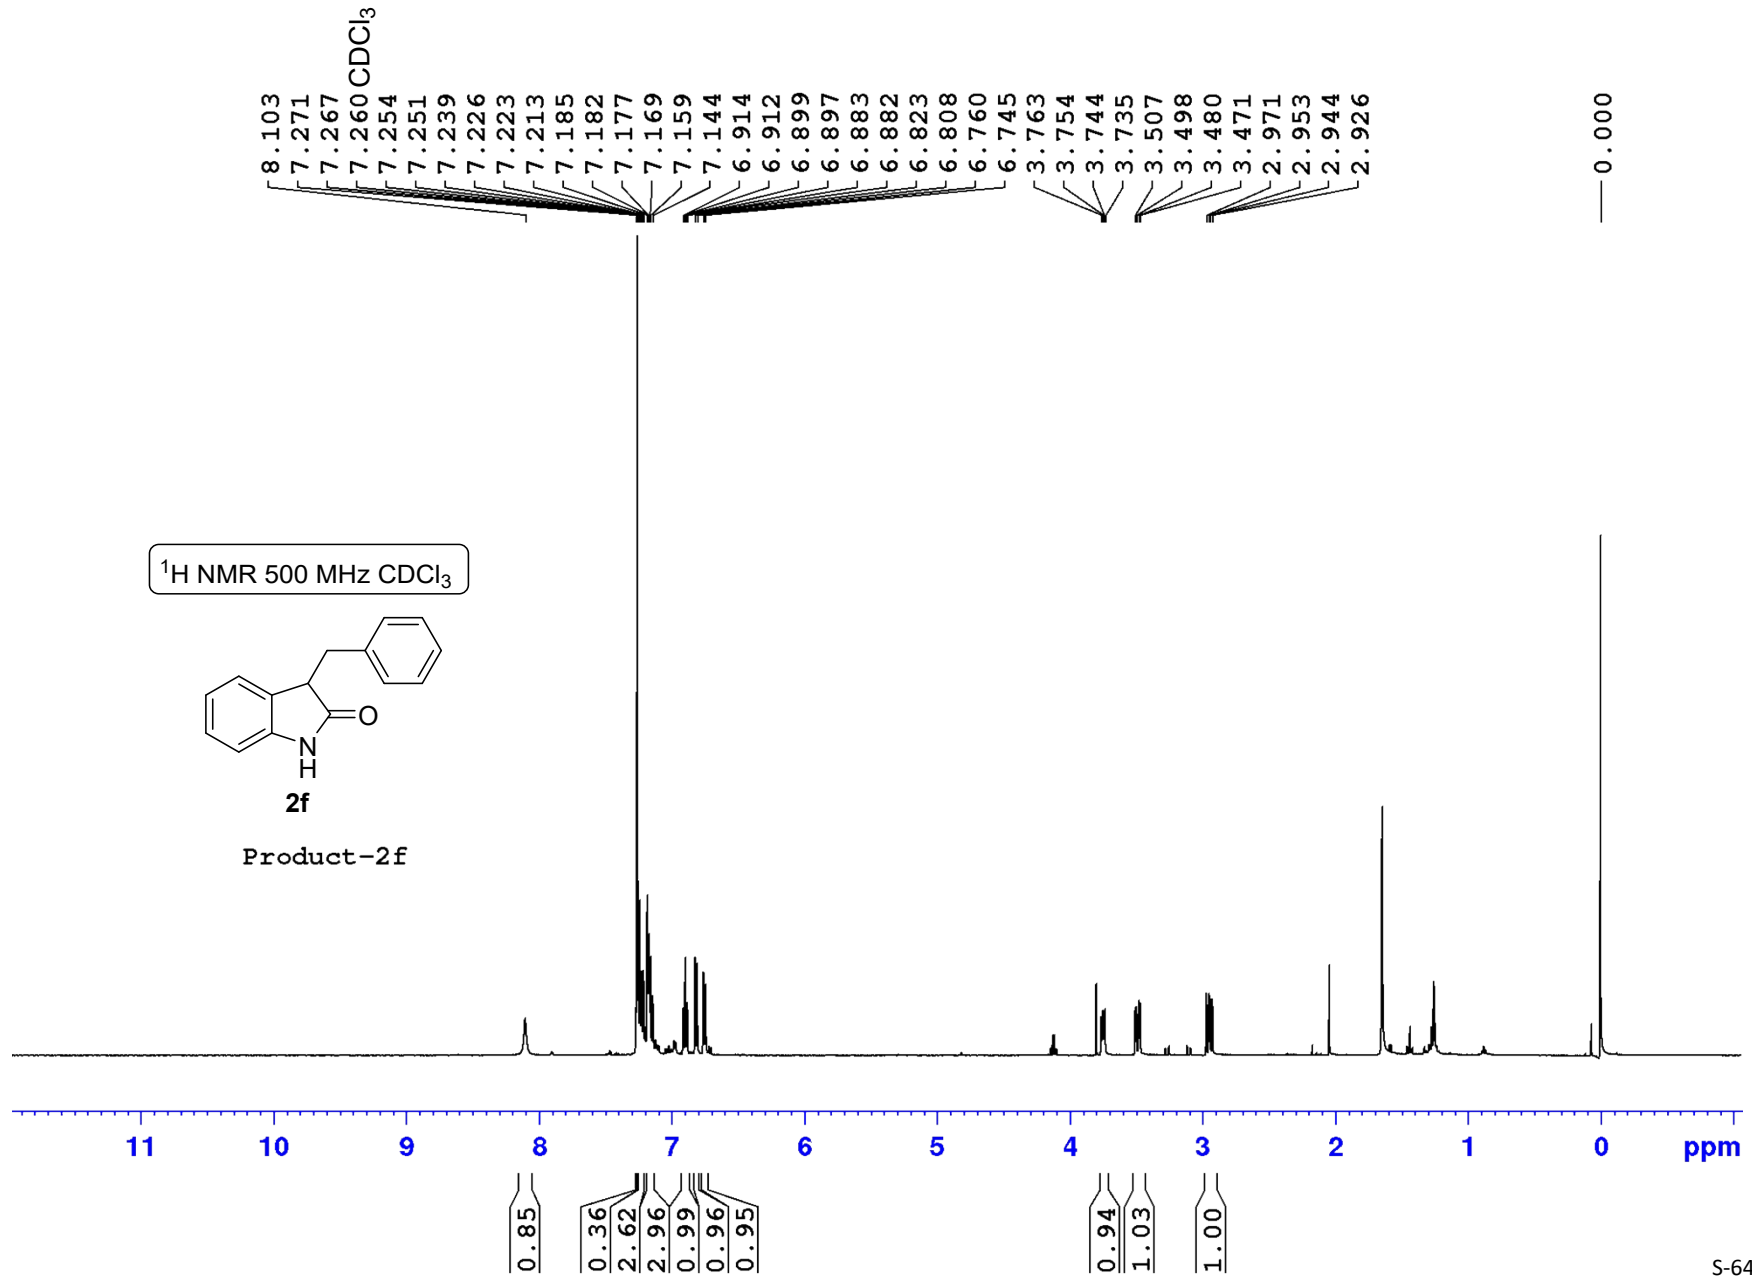



<sup>13</sup>C NMR 100 MHz CDCl<sub>3</sub>

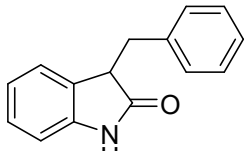

**2f**

Product-2f

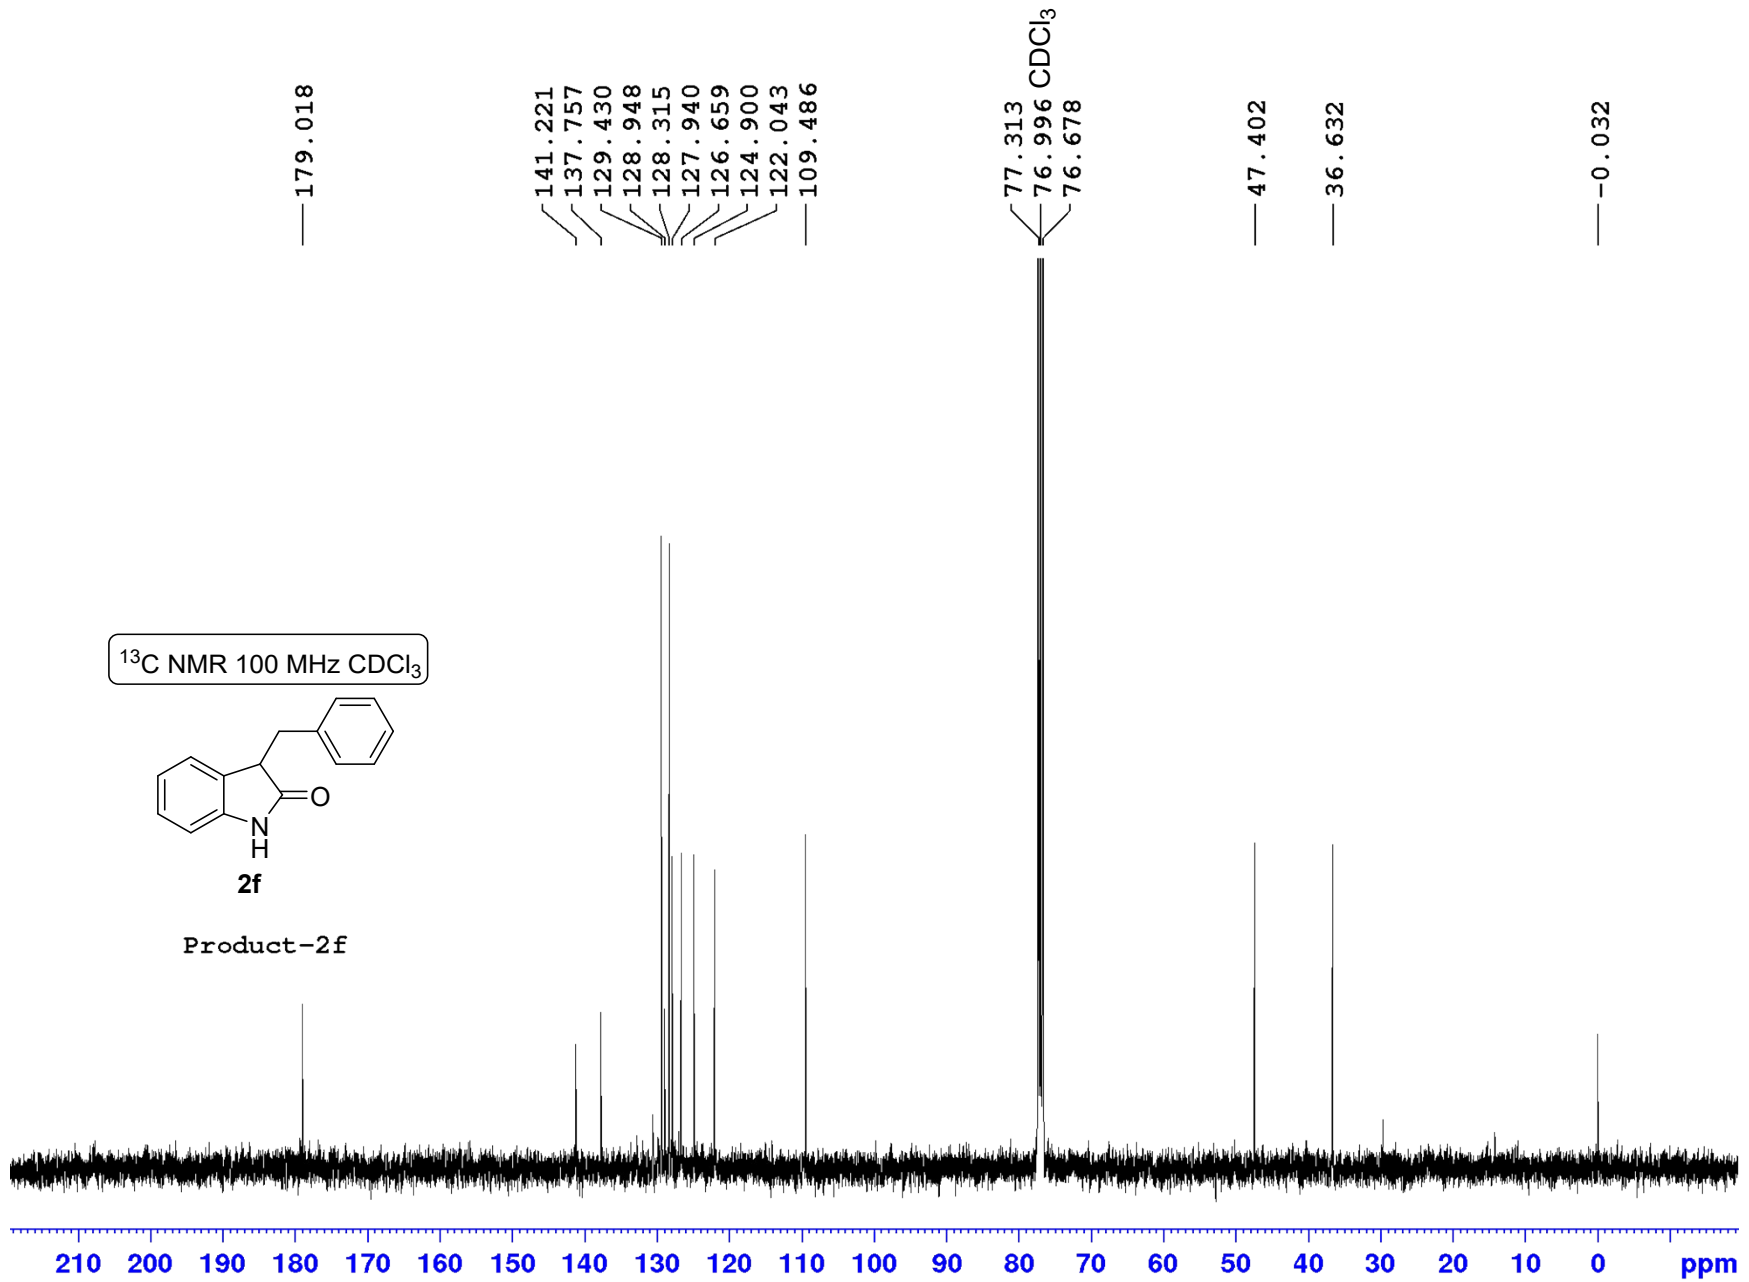

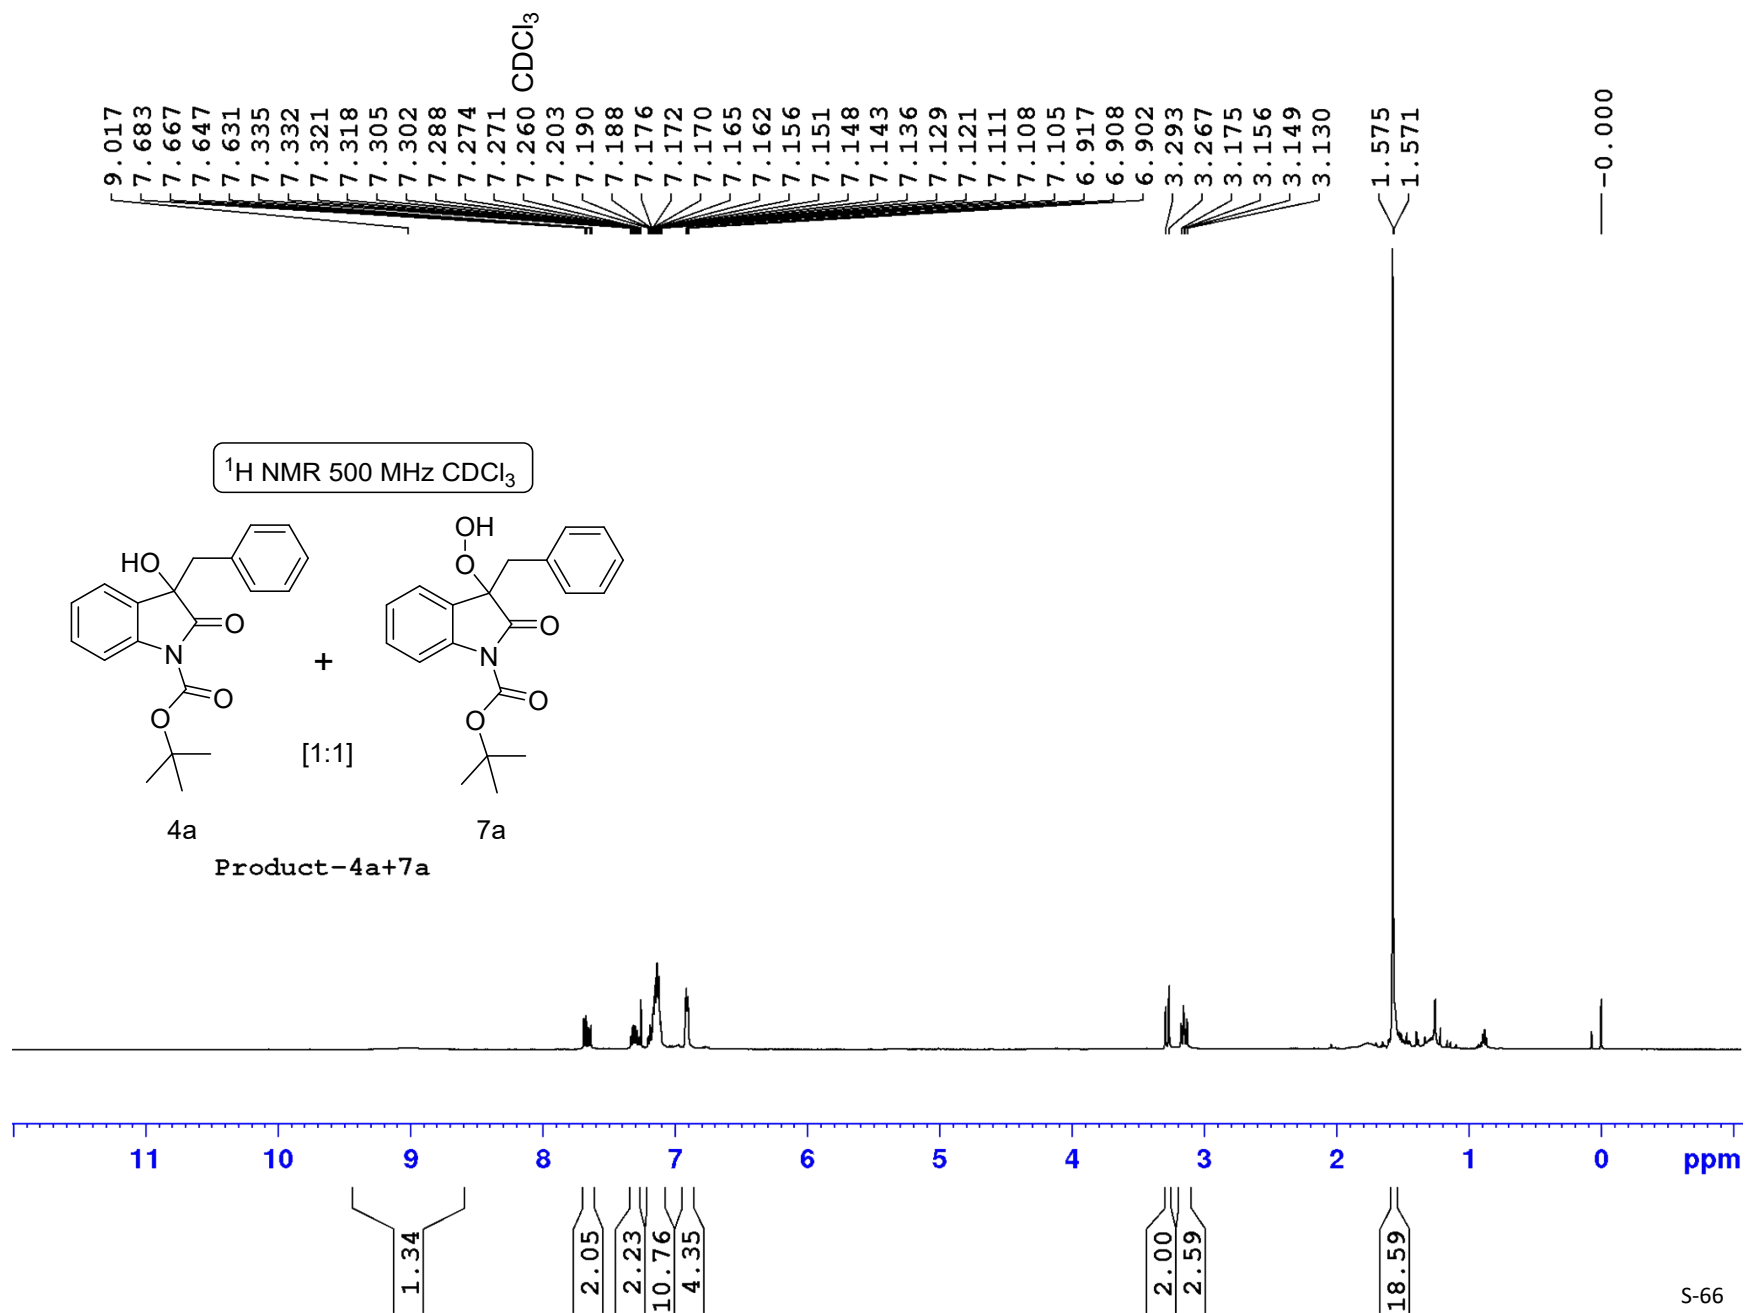

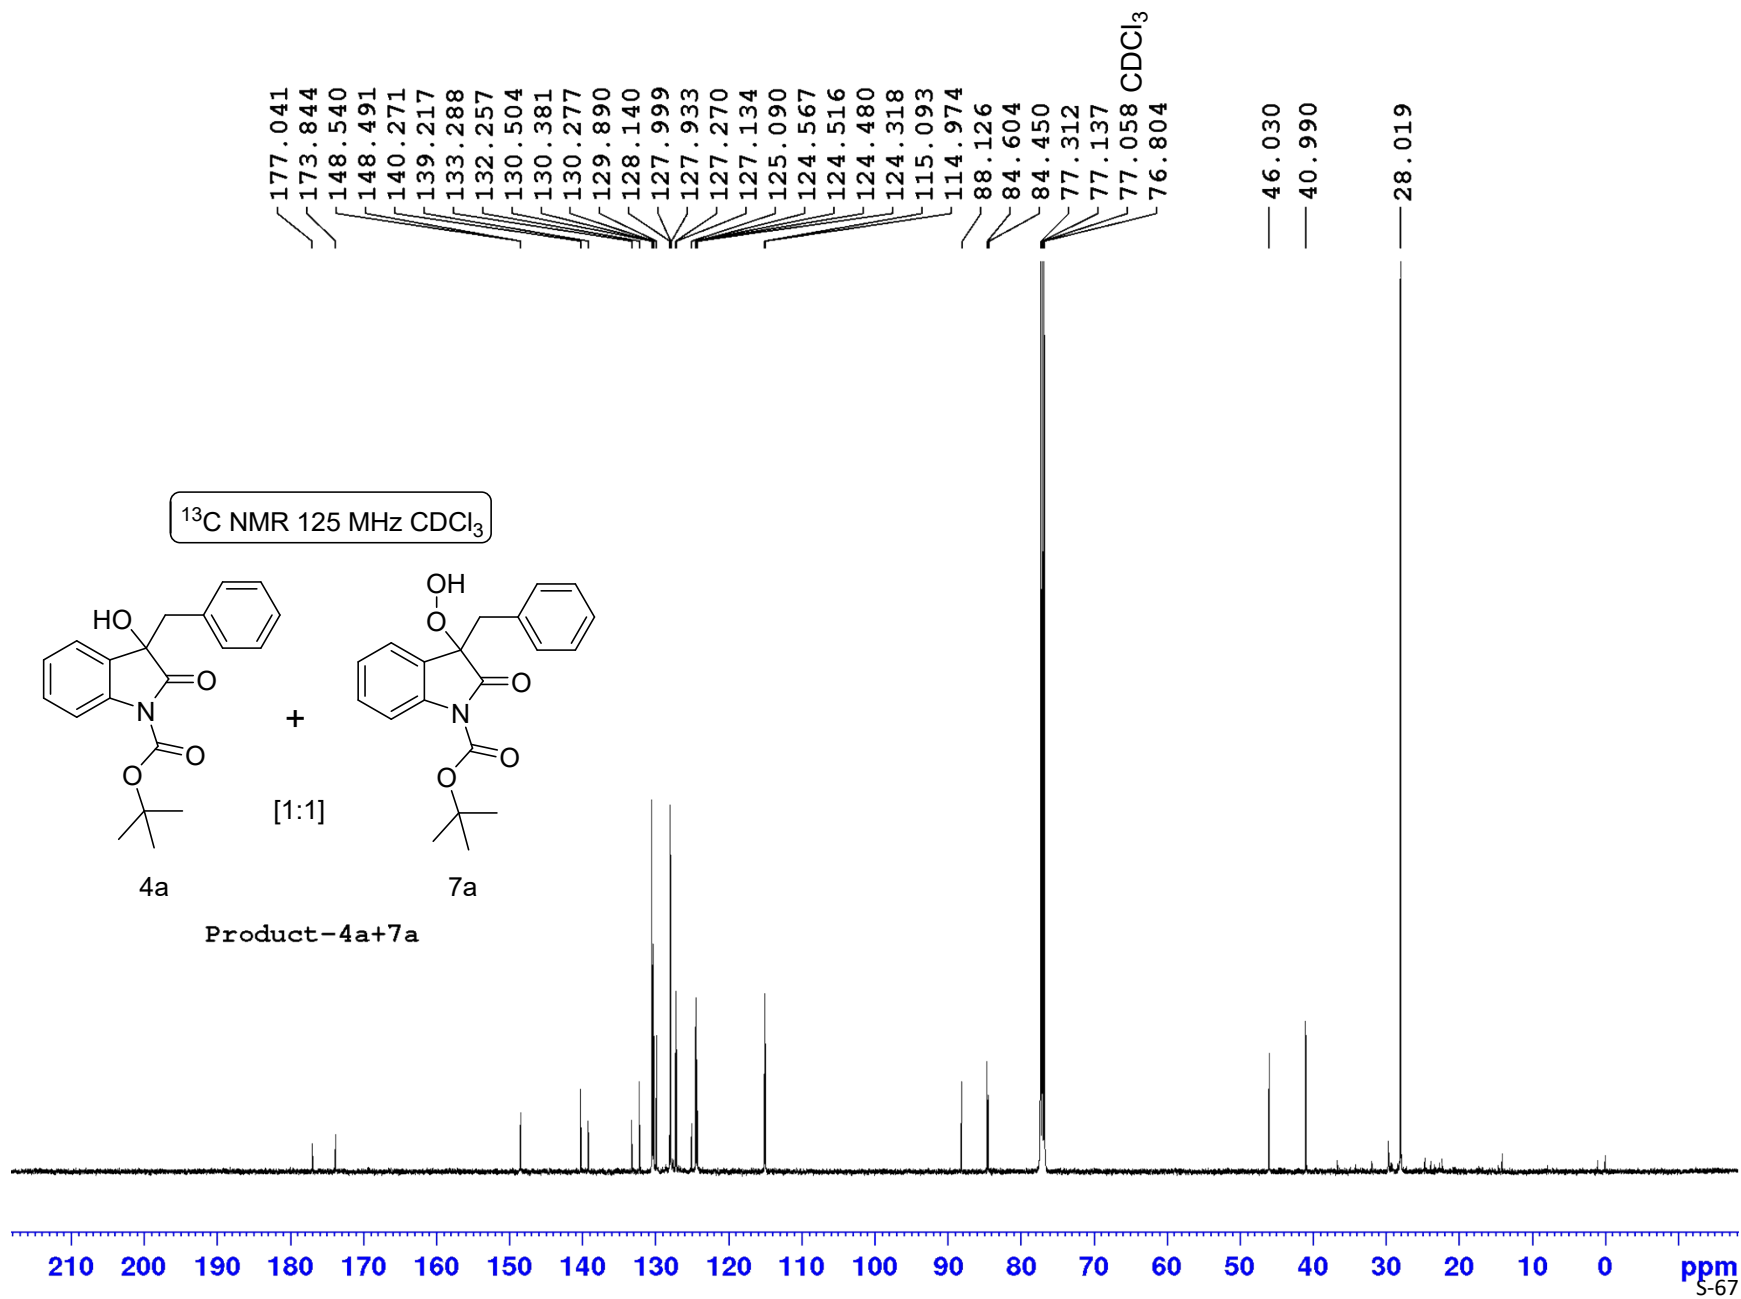

Supplement: d3ob01264f2.pdf [file d3ob01264f2.pdf]
